# Supplementary material for: Post-glacial phylogeography and evolution of a wide-ranging highly-exploited keystone forest tree, eastern white pine (Pinus strobus) in North America: single refugium, multiple routes
Source: PubMed Central journal article supplement (PMC4774161; doi:10.1186/s12862-016-0624-1), 2016-03-02
Supplement: 12862_2016_624_MOESM6_ESM.pdf [file 12862_2016_624_MOESM6_ESM.pdf]

John W. R. Zinck and Om P. Rajora

Table S3. Nuclear microsatellite genotype data

|         | RSP1 | RSP2 | RSP12 | RSP20 | RSP25 | RSP34b | RSP39 | RSP50 | RSP60 | RSP127 | RSP18 | RSP19 |     |     |     |     |     |     |     |     |     |     |     |     |
|---------|------|------|-------|-------|-------|--------|-------|-------|-------|--------|-------|-------|-----|-----|-----|-----|-----|-----|-----|-----|-----|-----|-----|-----|
| NFLG01  | 230  | 232  | 183   | 183   | 204   | 204    | 158   | 164   | 128   | 132    | 176   | 184   | 193 | 195 | 190 | 194 | 255 | 259 | 212 | 214 | 139 | 145 | 163 | 165 |
| NFLG02  | 228  | 228  | 175   | 189   | 204   | 204    | 158   | 170   | 126   | 128    | 174   | 176   | 193 | 193 | 202 | 204 | 255 | 261 | 212 | 214 | 139 | 145 | 163 | 165 |
| NFLG03  | 228  | 228  | 181   | 183   | 194   | 206    | 158   | 158   | 136   | 136    | 192   | 192   | 189 | 191 | 190 | 192 | 257 | 257 | 214 | 214 | 139 | 147 | 165 | 165 |
| NFLG04  | 230  | 230  | 183   | 185   | 206   | 208    | 152   | 152   | 128   | 130    | 168   | 170   | 193 | 193 | 186 | 194 | 255 | 271 | 214 | 214 | 139 | 147 | 165 | 167 |
| NFLG05  | 230  | 234  | 183   | 183   | 210   | 210    | 158   | 160   | 130   | 132    | 170   | 170   | 191 | 191 | 164 | 188 | 257 | 271 | 214 | 214 | 139 | 145 | 165 | 165 |
| NFLG06  | 238  | 238  | 183   | 185   | 210   | 224    | 164   | 164   | 130   | 130    | 168   | 168   | 189 | 191 | 188 | 190 | 255 | 273 | 212 | 214 | 137 | 147 | 163 | 165 |
| NFLG07  | 230  | 234  | 171   | 187   | 208   | 208    | 152   | 158   | 128   | 132    | 166   | 166   | 189 | 191 | 164 | 164 | 255 | 271 | 214 | 214 | 139 | 145 | 165 | 165 |
| NFLG08  | 230  | 234  | 183   | 191   | 190   | 210    | 148   | 158   | 128   | 130    | 166   | 168   | 191 | 203 | 184 | 192 | 251 | 263 | 214 | 216 | 139 | 145 | 165 | 167 |
| NFLG09  | 232  | 232  | 183   | 185   | 188   | 204    | 158   | 158   | 130   | 130    | 192   | 192   | 189 | 191 | 190 | 190 | 255 | 273 | 214 | 216 | 139 | 145 | 165 | 167 |
| NFLG10  | 232  | 234  | 183   | 183   | 206   | 206    | 158   | 172   | 128   | 132    | 156   | 166   | 191 | 191 | 164 | 194 | 255 | 271 | 212 | 216 | 139 | 145 | 167 | 167 |
| NFLG11  | 226  | 228  | 175   | 187   | 196   | 212    | 160   | 160   | 126   | 132    | 174   | 178   | 189 | 191 | 192 | 194 | 251 | 269 | 212 | 216 | 139 | 145 | 163 | 167 |
| NFLG12  | 228  | 228  | 183   | 185   | 208   | 208    | 158   | 158   | 126   | 128    | 170   | 172   | 189 | 193 | 190 | 190 | 253 | 253 | 214 | 214 | 139 | 145 | 165 | 165 |
| NFLG13  | 230  | 232  | 183   | 195   | 190   | 220    | 152   | 152   | 132   | 132    | 168   | 168   | 189 | 189 | 186 | 190 | 255 | 271 | 214 | 214 | 139 | 145 | 165 | 165 |
| NFLG14  | 228  | 228  | 187   | 187   | 208   | 208    | 172   | 172   | 128   | 130    | 174   | 176   | 195 | 195 | 198 | 200 | 255 | 261 | 214 | 214 | 139 | 145 | 165 | 165 |
| NFLG15  | 228  | 228  | 183   | 185   | 204   | 204    | 162   | 176   | 136   | 136    | 186   | 188   | 191 | 193 | 190 | 190 | 267 | 271 | 214 | 218 | 139 | 145 | 165 | 169 |
| NFLG16  | 228  | 228  | 185   | 191   | 192   | 192    | 176   | 176   | 124   | 134    | 186   | 188   | 191 | 191 | 196 | 196 | 251 | 251 | 214 | 216 | 139 | 145 | 165 | 167 |
| NFLG17  | 228  | 228  | 185   | 185   | 208   | 208    | 168   | 168   | 128   | 132    | 174   | 176   | 191 | 191 | 202 | 202 | 255 | 255 | 216 | 216 | 139 | 145 | 167 | 167 |
| NFLG18  | 228  | 228  | 171   | 183   | 182   | 184    | 158   | 162   | 130   | 130    | 188   | 188   | 179 | 193 | 188 | 198 | 253 | 257 | 212 | 214 | 139 | 145 | 163 | 165 |
| NFLG19  | 230  | 234  | 183   | 195   | 204   | 208    | 152   | 168   | 130   | 130    | 176   | 184   | 193 | 195 | 190 | 190 | 255 | 259 | 212 | 216 | 139 | 145 | 163 | 167 |
| NFLG20  | 228  | 234  | 183   | 197   | 212   | 214    | 160   | 176   | 130   | 132    | 156   | 168   | 191 | 191 | 188 | 192 | 257 | 271 | 214 | 216 | 139 | 145 | 165 | 167 |
| NFLG21  | 230  | 238  | 185   | 185   | 210   | 216    | 154   | 162   | 134   | 136    | 144   | 162   | 181 | 181 | 164 | 188 | 255 | 271 | 214 | 216 | 139 | 145 | 165 | 167 |
| NFLG22  | 228  | 228  | 183   | 187   | 190   | 206    | 160   | 176   | 132   | 136    | 190   | 190   | 193 | 193 | 192 | 200 | 253 | 271 | 212 | 216 | 139 | 145 | 163 | 167 |
| NFLG23  | 230  | 232  | 183   | 191   | 206   | 210    | 158   | 160   | 130   | 132    | 168   | 168   | 189 | 189 | 188 | 190 | 257 | 269 | 170 | 214 | 139 | 145 | 165 | 165 |
| NFLG24  | 232  | 234  | 183   | 183   | 208   | 208    | 160   | 174   | 128   | 130    | 168   | 168   | 191 | 191 | 184 | 190 | 257 | 271 | 212 | 216 | 139 | 145 | 167 | 167 |
| NFLG25  | 228  | 228  | 183   | 183   | 194   | 208    | 158   | 158   | 130   | 134    | 186   | 188   | 177 | 185 | 188 | 190 | 255 | 255 | 214 | 214 | 139 | 145 | 165 | 165 |
| NFLG26  | 230  | 234  | 187   | 197   | 210   | 210    | 154   | 158   | 132   | 134    | 166   | 166   | 189 | 199 | 190 | 190 | 255 | 271 | 214 | 216 | 137 | 145 | 165 | 167 |
| NFLG27  | 228  | 228  | 183   | 185   | 194   | 208    | 160   | 176   | 134   | 134    | 188   | 188   | 189 | 193 | 190 | 200 | 269 | 271 | 212 | 216 | 139 | 145 | 163 | 167 |
| NFLG28  | 228  | 228  | 181   | 185   | 202   | 202    | 174   | 174   | 128   | 130    | 170   | 176   | 191 | 193 | 190 | 198 | 255 | 257 | 214 | 214 | 139 | 145 | 165 | 165 |
| NFLG29  | 228  | 228  | 185   | 185   | 206   | 206    | 172   | 172   | 122   | 122    | 174   | 176   | 195 | 195 | 198 | 200 | 255 | 261 | 198 | 214 | 139 | 145 | 149 | 165 |
| NFLG30  | 232  | 238  | 181   | 181   | 208   | 210    | 160   | 176   | 124   | 128    | 166   | 184   | 191 | 193 | 190 | 192 | 255 | 271 | 214 | 218 | 139 | 145 | 165 | 169 |
| NFLG31  | 222  | 222  | 169   | 185   | 206   | 206    | 158   | 174   | 122   | 124    | 170   | 176   | 185 | 193 | 188 | 200 | 253 | 253 | 214 | 214 | 139 | 145 | 165 | 165 |
| NFLG32  | 228  | 234  | 185   | 197   | 188   | 188    | 160   | 174   | 130   | 130    | 156   | 166   | 187 | 189 | 186 | 194 | 255 | 271 | 214 | 214 | 137 | 145 | 165 | 165 |
| NFLG33  | 228  | 228  | 183   | 183   | 202   | 206    | 174   | 174   | 132   | 136    | 190   | 190   | 191 | 199 | 188 | 194 | 257 | 269 | 212 | 218 | 141 | 145 | 163 | 169 |
| NFLG34  | 228  | 228  | 187   | 189   | 196   | 210    | 160   | 176   | 118   | 120    | 172   | 174   | 189 | 193 | 190 | 200 | 255 | 271 | 212 | 216 | 137 | 145 | 163 | 167 |
| NFLG35  | 228  | 228  | 179   | 185   | 200   | 210    | 148   | 158   | 132   | 132    | 166   | 166   | 189 | 189 | 190 | 190 | 255 | 271 | 214 | 214 | 139 | 145 | 165 | 165 |
| NFLG36  | 230  | 232  | 183   | 195   | 186   | 188    | 146   | 158   | 130   | 130    | 166   | 186   | 185 | 193 | 190 | 190 | 257 | 271 | 212 | 214 | 139 | 145 | 163 | 165 |
| NFLG37  | 222  | 222  | 189   | 191   | 208   | 210    | 176   | 176   | 132   | 134    | 174   | 176   | 187 | 191 | 188 | 200 | 253 | 257 | 214 | 214 | 139 | 145 | 165 | 165 |
| NFLG38  | 228  | 228  | 187   | 187   | 206   | 206    | 162   | 172   | 136   | 138    | 174   | 176   | 193 | 193 | 198 | 200 | 255 | 261 | 198 | 214 | 141 | 147 | 149 | 165 |
| NFLG39  | 228  | 228  | 181   | 183   | 204   | 208    | 158   | 164   | 126   | 128    | 176   | 178   | 191 | 193 | 188 | 190 | 253 | 253 | 214 | 214 | 141 | 147 | 149 | 165 |
| NFLG40  | 230  | 234  | 183   | 197   | 210   | 210    | 158   | 174   | 130   | 130    | 166   | 166   | 185 | 185 | 190 | 190 | 257 | 271 | 214 | 214 | 137 | 145 | 165 | 165 |
| NFLG41  | 228  | 234  | 183   | 185   | 208   | 208    | 158   | 172   | 124   | 126    | 176   | 178   | 195 | 195 | 194 | 194 | 253 | 253 | 216 | 216 | 139 | 145 | 167 | 167 |
| NFLG42  | 228  | 228  | 183   | 185   | 198   | 202    | 158   | 160   | 140   | 140    | 188   | 188   | 189 | 193 | 188 | 200 | 253 | 253 | 214 | 216 | 139 | 147 | 165 | 167 |
| NFLG43  | 228  | 228  | 187   | 189   | 194   | 194    | 176   | 176   | 130   | 132    | 170   | 174   | 191 | 191 | 196 | 196 | 251 | 251 | 214 | 216 | 139 | 145 | 165 | 167 |
| NFLG44  | 228  | 228  | 183   | 183   | 204   | 204    | 158   | 158   | 132   | 132    | 192   | 192   | 189 | 191 | 188 | 188 | 255 | 257 | 214 | 216 | 139 | 145 | 165 | 167 |
| NFLG45  | 222  | 228  | 183   | 183   | 194   | 194    | 150   | 150   | 134   | 134    | 188   | 188   | 187 | 191 | 198 | 198 | 253 | 277 | 212 | 218 | 139 | 145 | 163 | 169 |
| NFLG46  | 230  | 232  | 183   | 183   | 210   | 228    | 158   | 168   | 130   | 132    | 168   | 168   | 193 | 193 | 186 | 190 | 255 | 271 | 214 | 214 | 139 | 145 | 165 | 165 |
| NFLG47  | 226  | 228  | 181   | 185   | 194   | 210    | 160   | 160   | 134   | 134    | 190   | 192   | 189 | 191 | 192 | 194 | 257 | 269 | 212 | 216 | 141 | 145 | 163 | 167 |
| NFLG48  | 230  | 234  | 181   | 195   | 206   | 208    | 160   | 176   | 130   | 134    | 184   | 184   | 191 | 193 | 164 | 190 | 255 | 271 | 216 | 216 | 139 | 145 | 167 | 167 |
| NFLG49  | 228  | 234  | 181   | 183   | 208   | 210    | 144   | 158   | 130   | 132    | 174   | 176   | 191 | 193 | 190 | 192 | 253 | 255 | 214 | 216 | 141 | 145 | 165 | 167 |
| NFLG50  | 230  | 234  | 183   | 183   | 204   | 210    | 164   | 164   | 130   | 130    | 144   | 166   | 177 | 191 | 164 | 188 | 255 | 271 | 212 | 216 | 139 | 145 | 163 | 167 |
| NBPMH01 | 230  | 232  | 183   | 183   | 204   | 204    | 158   | 164   | 128   | 132    | 176   | 184   | 193 | 195 | 190 | 194 | 255 | 259 | 212 | 214 | 139 | 147 | 163 | 165 |
| NBPMH02 | 230  | 234  | 183   | 195   | 204   | 208    | 152   | 168   | 130   | 130    | 176   | 184   | 193 | 195 | 190 | 190 | 255 | 259 | 212 | 216 | 139 | 145 | 163 | 167 |
| NBPMH03 | 230  | 232  | 183   | 195   | 186   | 188    | 146   | 158   | 130   | 130    | 166   | 186   | 185 | 193 | 190 | 190 | 257 | 271 | 212 | 214 | 139 | 145 | 163 | 165 |
| NBPMH04 | 230  | 234  | 183   | 185   | 208   | 208    | 158   | 172   | 124   | 126    | 176   | 178   | 195 | 195 | 194 | 194 | 253 | 253 | 216 | 216 | 139 | 145 | 167 | 167 |
| NBPMH05 | 230  | 230  | 185   | 197   | 208   | 208    | 158   | 176   | 128   | 132    | 164   | 168   | 189 | 193 | 192 | 196 | 255 | 275 | 170 | 210 | 139 | 145 | 167 | 167 |
| NBPMH06 | 230  | 230  | 183   | 183   | 204   | 214    | 160   | 174   | 132   | 132    | 168   | 168   | 191 | 191 | 192 | 196 | 255 | 273 | 214 | 216 | 139 | 145 | 165 | 167 |
| NBPMH07 | 230  | 230  | 183   | 185   | 208   | 210    | 150   | 150   | 130   | 130    | 166   | 170   | 179 | 191 | 190 | 192 | 255 | 271 | 198 | 214 | 139 | 145 | 149 | 165 |
| NBPMH08 | 230  | 232  | 183   | 185   | 208   | 210    | 152   | 152   | 132   | 132    | 146   | 164   | 189 | 191 | 190 | 192 | 241 | 253 | 214 | 214 | 139 | 147 | 165 | 165 |
| NBPMH09 | 230  | 230  | 183   | 183   |       |        |       |       |       |        |       |       |     |     |     |     |     |     |     |     |     |     |     |     |

|        |     |     |     |     |     |     |     |     |     |     |     |     |     |     |     |     |     |     |     |     |     |     |     |     |
|--------|-----|-----|-----|-----|-----|-----|-----|-----|-----|-----|-----|-----|-----|-----|-----|-----|-----|-----|-----|-----|-----|-----|-----|-----|
| NBCI15 | 230 | 230 | 169 | 183 | 206 | 208 | 158 | 172 | 128 | 130 | 164 | 168 | 183 | 193 | 188 | 194 | 259 | 259 | 212 | 212 | 139 | 147 | 167 | 167 |
| NBCI16 | 228 | 228 | 183 | 183 | 206 | 206 | 156 | 172 | 130 | 130 | 156 | 166 | 183 | 193 | 230 | 252 | 255 | 259 | 212 | 214 | 139 | 147 | 167 | 169 |
| NBCI17 | 228 | 228 | 183 | 183 | 214 | 214 | 156 | 158 | 130 | 132 | 156 | 166 | 191 | 191 | 230 | 252 | 255 | 261 | 212 | 214 | 139 | 147 | 167 | 169 |
| NBCI18 | 228 | 228 | 183 | 183 | 208 | 210 | 158 | 170 | 126 | 130 | 164 | 168 | 191 | 201 | 190 | 194 | 259 | 273 | 212 | 212 | 139 | 145 | 167 | 167 |
| NBCI19 | 228 | 228 | 183 | 183 | 190 | 218 | 156 | 156 | 134 | 134 | 164 | 166 | 179 | 193 | 180 | 188 | 255 | 257 | 216 | 216 | 139 | 145 | 171 | 171 |
| NBCI20 | 228 | 228 | 181 | 191 | 206 | 206 | 156 | 156 | 128 | 132 | 156 | 166 | 191 | 191 | 188 | 190 | 255 | 255 | 212 | 214 | 139 | 145 | 167 | 169 |
| NBCI21 | 228 | 228 | 169 | 183 | 208 | 208 | 156 | 156 | 128 | 128 | 144 | 166 | 191 | 193 | 190 | 190 | 255 | 255 | 212 | 214 | 137 | 145 | 167 | 169 |
| NBCI22 | 194 | 194 | 183 | 183 | 206 | 206 | 156 | 156 | 132 | 132 | 144 | 166 | 191 | 191 | 190 | 190 | 259 | 259 | 210 | 214 | 139 | 145 | 165 | 169 |
| NBCI23 | 228 | 232 | 183 | 183 | 206 | 206 | 158 | 174 | 128 | 128 | 164 | 166 | 193 | 193 | 196 | 204 | 259 | 265 | 212 | 212 | 139 | 145 | 167 | 167 |
| NBCI24 | 228 | 228 | 181 | 181 | 190 | 190 | 160 | 170 | 130 | 132 | 156 | 164 | 193 | 193 | 188 | 188 | 259 | 259 | 212 | 212 | 139 | 145 | 167 | 167 |
| NBCI25 | 228 | 228 | 181 | 185 | 180 | 190 | 158 | 172 | 130 | 130 | 156 | 164 | 193 | 201 | 200 | 200 | 255 | 255 | 212 | 212 | 139 | 145 | 167 | 167 |
| NBCI26 | 228 | 228 | 183 | 185 | 172 | 202 | 156 | 162 | 130 | 130 | 166 | 170 | 191 | 201 | 200 | 200 | 257 | 259 | 216 | 216 | 139 | 145 | 171 | 171 |
| NBCI27 | 230 | 244 | 177 | 183 | 190 | 210 | 152 | 160 | 128 | 128 | 168 | 170 | 181 | 193 | 190 | 194 | 257 | 259 | 212 | 212 | 139 | 145 | 167 | 167 |
| NBCI28 | 230 | 232 | 183 | 191 | 186 | 210 | 160 | 172 | 128 | 130 | 168 | 168 | 191 | 193 | 188 | 190 | 255 | 255 | 212 | 212 | 139 | 145 | 167 | 167 |
| NBCI29 | 230 | 230 | 183 | 183 | 172 | 172 | 158 | 160 | 128 | 130 | 166 | 168 | 191 | 193 | 190 | 190 | 255 | 255 | 216 | 216 | 137 | 145 | 171 | 171 |
| NBCI30 | 230 | 230 | 183 | 185 | 192 | 192 | 172 | 172 | 130 | 130 | 166 | 168 | 189 | 193 | 182 | 188 | 255 | 255 | 212 | 212 | 139 | 145 | 167 | 167 |
| NBCI31 | 230 | 230 | 183 | 183 | 208 | 210 | 158 | 170 | 130 | 130 | 166 | 168 | 189 | 191 | 192 | 192 | 255 | 255 | 210 | 212 | 139 | 145 | 165 | 167 |
| NBCI32 | 228 | 228 | 183 | 209 | 192 | 208 | 154 | 158 | 132 | 132 | 166 | 168 | 189 | 191 | 188 | 188 | 255 | 255 | 212 | 214 | 139 | 145 | 167 | 169 |
| NBCI33 | 228 | 228 | 183 | 183 | 186 | 208 | 156 | 156 | 132 | 132 | 166 | 166 | 201 | 201 | 190 | 192 | 255 | 255 | 212 | 214 | 139 | 147 | 167 | 169 |
| NBCI34 | 224 | 232 | 185 | 185 | 184 | 204 | 158 | 158 | 130 | 132 | 166 | 166 | 189 | 189 | 194 | 200 | 253 | 257 | 212 | 214 | 139 | 145 | 167 | 169 |
| NBCI35 | 226 | 236 | 185 | 191 | 212 | 216 | 150 | 158 | 122 | 128 | 166 | 168 | 185 | 189 | 194 | 200 | 255 | 259 | 0   | 0   | 139 | 145 | 0   | 0   |
| NBCI36 | 226 | 236 | 183 | 183 | 192 | 204 | 172 | 174 | 130 | 132 | 166 | 168 | 191 | 201 | 188 | 204 | 257 | 261 | 212 | 214 | 135 | 145 | 167 | 169 |
| NBCI37 | 226 | 232 | 183 | 183 | 192 | 204 | 156 | 156 | 132 | 132 | 156 | 166 | 191 | 191 | 194 | 206 | 255 | 259 | 212 | 212 | 139 | 145 | 167 | 167 |
| NBCI38 | 228 | 228 | 183 | 191 | 180 | 192 | 172 | 184 | 132 | 136 | 166 | 166 | 189 | 189 | 178 | 188 | 255 | 255 | 204 | 204 | 139 | 145 | 159 | 159 |
| NBCI39 | 228 | 232 | 183 | 185 | 208 | 212 | 158 | 172 | 130 | 130 | 166 | 166 | 189 | 191 | 190 | 190 | 255 | 255 | 212 | 212 | 139 | 145 | 167 | 167 |
| NBCI40 | 232 | 232 | 185 | 185 | 208 | 210 | 156 | 168 | 128 | 136 | 166 | 166 | 189 | 189 | 190 | 200 | 255 | 255 | 212 | 212 | 139 | 145 | 167 | 167 |
| NBCI41 | 232 | 232 | 183 | 183 | 210 | 216 | 170 | 172 | 130 | 132 | 156 | 166 | 189 | 189 | 194 | 200 | 255 | 255 | 212 | 214 | 139 | 145 | 167 | 169 |
| NBCI42 | 232 | 232 | 183 | 185 | 206 | 206 | 150 | 164 | 130 | 130 | 164 | 166 | 187 | 189 | 188 | 200 | 261 | 261 | 212 | 216 | 139 | 145 | 167 | 171 |
| NBCI43 | 230 | 230 | 169 | 185 | 196 | 208 | 150 | 158 | 130 | 132 | 164 | 166 | 177 | 191 | 192 | 202 | 261 | 261 | 212 | 212 | 139 | 145 | 167 | 167 |
| NBCI44 | 238 | 238 | 181 | 183 | 192 | 214 | 158 | 158 | 132 | 132 | 156 | 166 | 187 | 189 | 196 | 198 | 261 | 261 | 212 | 212 | 139 | 145 | 167 | 167 |
| NBCI45 | 232 | 232 | 183 | 185 | 192 | 212 | 158 | 160 | 128 | 128 | 156 | 166 | 191 | 197 | 194 | 200 | 257 | 261 | 214 | 214 | 139 | 145 | 169 | 169 |
| NBCI46 | 230 | 232 | 183 | 183 | 192 | 212 | 158 | 160 | 128 | 130 | 156 | 164 | 189 | 191 | 200 | 200 | 259 | 277 | 212 | 216 | 139 | 145 | 167 | 171 |
| NBCI47 | 232 | 232 | 183 | 183 | 208 | 212 | 158 | 166 | 130 | 132 | 166 | 166 | 191 | 191 | 188 | 200 | 257 | 257 | 212 | 216 | 135 | 145 | 167 | 171 |
| NBCI48 | 234 | 234 | 183 | 183 | 188 | 212 | 158 | 158 | 130 | 130 | 166 | 166 | 189 | 191 | 194 | 198 | 257 | 257 | 212 | 212 | 139 | 145 | 167 | 167 |
| NBCI49 | 230 | 230 | 181 | 181 | 212 | 212 | 158 | 158 | 132 | 132 | 166 | 166 | 189 | 191 | 190 | 190 | 257 | 257 | 212 | 212 | 139 | 145 | 167 | 167 |
| NBCI50 | 224 | 230 | 183 | 185 | 210 | 210 | 156 | 156 | 134 | 138 | 156 | 166 | 175 | 189 | 188 | 190 | 255 | 259 | 212 | 212 | 139 | 145 | 167 | 167 |
| NBCR01 | 230 | 234 | 185 | 187 | 212 | 214 | 144 | 160 | 124 | 128 | 168 | 168 | 191 | 193 | 192 | 196 | 251 | 251 | 214 | 214 | 139 | 147 | 165 | 165 |
| NBCR02 | 230 | 230 | 185 | 187 | 198 | 212 | 148 | 162 | 126 | 128 | 168 | 168 | 193 | 193 | 190 | 190 | 251 | 251 | 216 | 216 | 139 | 145 | 167 | 167 |
| NBCR03 | 230 | 232 | 175 | 187 | 206 | 210 | 148 | 162 | 124 | 130 | 168 | 170 | 189 | 191 | 188 | 202 | 251 | 255 | 170 | 214 | 139 | 145 | 165 | 165 |
| NBCR04 | 232 | 232 | 185 | 187 | 210 | 212 | 150 | 162 | 124 | 130 | 146 | 170 | 193 | 201 | 160 | 200 | 251 | 251 | 198 | 214 | 139 | 145 | 149 | 165 |
| NBCR05 | 232 | 232 | 175 | 189 | 208 | 210 | 148 | 160 | 122 | 126 | 162 | 166 | 191 | 191 | 188 | 198 | 251 | 251 | 198 | 214 | 139 | 147 | 149 | 165 |
| NBCR06 | 232 | 232 | 175 | 187 | 210 | 210 | 158 | 168 | 126 | 130 | 142 | 166 | 191 | 191 | 192 | 194 | 251 | 251 | 212 | 216 | 137 | 147 | 163 | 167 |
| NBCR07 | 232 | 234 | 175 | 185 | 210 | 214 | 158 | 160 | 126 | 130 | 144 | 166 | 191 | 191 | 188 | 190 | 251 | 251 | 198 | 212 | 139 | 145 | 149 | 163 |
| NBCR08 | 234 | 234 | 175 | 187 | 210 | 214 | 144 | 158 | 122 | 122 | 144 | 168 | 191 | 191 | 194 | 196 | 251 | 253 | 198 | 198 | 139 | 145 | 149 | 165 |
| NBCR09 | 246 | 246 | 189 | 189 | 208 | 212 | 156 | 162 | 132 | 136 | 166 | 166 | 191 | 191 | 204 | 206 | 251 | 251 | 214 | 214 | 139 | 147 | 165 | 165 |
| NBCR10 | 214 | 214 | 175 | 187 | 202 | 208 | 160 | 174 | 130 | 130 | 166 | 168 | 189 | 191 | 198 | 200 | 257 | 257 | 212 | 216 | 141 | 145 | 165 | 165 |
| NBCR11 | 226 | 236 | 173 | 189 | 194 | 208 | 140 | 158 | 118 | 122 | 166 | 168 | 191 | 191 | 202 | 202 | 253 | 257 | 212 | 212 | 139 | 145 | 163 | 163 |
| NBCR12 | 236 | 236 | 175 | 189 | 206 | 210 | 158 | 158 | 122 | 126 | 166 | 166 | 191 | 193 | 200 | 206 | 257 | 257 | 216 | 218 | 139 | 145 | 167 | 169 |
| NBCR13 | 238 | 238 | 187 | 189 | 204 | 208 | 158 | 176 | 122 | 126 | 162 | 166 | 191 | 191 | 190 | 194 | 253 | 253 | 212 | 214 | 139 | 145 | 163 | 165 |
| NBCR14 | 238 | 238 | 187 | 191 | 206 | 212 | 158 | 174 | 118 | 120 | 164 | 166 | 191 | 193 | 188 | 196 | 251 | 253 | 214 | 214 | 139 | 147 | 165 | 165 |
| NBCR15 | 238 | 238 | 175 | 187 | 192 | 200 | 168 | 168 | 106 | 120 | 164 | 170 | 189 | 195 | 160 | 200 | 253 | 257 | 210 | 216 | 139 | 147 | 161 | 167 |
| NBCR16 | 238 | 238 | 175 | 189 | 200 | 206 | 172 | 176 | 120 | 124 | 162 | 166 | 189 | 195 | 194 | 194 | 251 | 255 | 198 | 214 | 139 | 147 | 149 | 165 |
| NBCR17 | 222 | 222 | 189 | 191 | 192 | 208 | 160 | 174 | 122 | 124 | 166 | 168 | 189 | 195 | 190 | 194 | 251 | 251 | 198 | 214 | 139 | 147 | 149 | 165 |
| NBCR18 | 222 | 224 | 189 | 191 | 192 | 208 | 158 | 174 | 126 | 126 | 166 | 170 | 191 | 193 | 192 | 192 | 251 | 251 | 214 | 214 | 139 | 145 | 165 | 165 |
| NBCR19 | 224 | 224 | 187 | 189 | 172 | 190 | 160 | 174 | 126 | 126 | 162 | 166 | 191 | 193 | 200 | 200 | 251 | 251 | 198 | 214 | 139 | 145 | 149 | 165 |
| NBCR20 | 222 | 224 | 187 | 189 | 192 | 210 | 158 | 182 | 122 | 122 | 166 | 168 | 191 | 193 | 198 | 198 | 251 | 251 | 214 | 216 | 139 | 145 | 165 | 167 |
| NBCR21 | 222 | 222 | 175 | 187 | 192 | 210 | 174 | 174 | 130 | 132 | 154 | 168 | 191 | 193 | 198 | 198 | 251 | 251 | 214 | 214 | 137 | 145 | 165 | 167 |
| NBCR22 | 222 | 222 | 175 | 187 | 206 | 206 | 174 | 174 | 132 | 132 | 156 | 172 | 191 | 191 | 204 | 206 | 253 | 253 | 214 | 214 | 139 | 145 | 165 | 165 |
| NBCR23 | 214 | 214 | 175 | 187 | 196 | 208 | 160 | 174 | 130 | 132 | 164 | 168 | 191 | 193 | 188 | 198 | 253 | 253 | 212 | 216 | 139 | 145 | 163 | 167 |
| NBCR24 | 222 | 222 | 187 | 189 | 208 | 218 | 158 | 174 | 130 | 132 | 164 | 168 | 189 | 193 | 188 | 188 | 251 | 251 | 214 | 216 | 139 | 145 | 165 | 167 |

|         |     |     |     |     |     |     |     |     |     |     |     |     |     |     |     |     |     |     |     |     |     |     |     |     |
|---------|-----|-----|-----|-----|-----|-----|-----|-----|-----|-----|-----|-----|-----|-----|-----|-----|-----|-----|-----|-----|-----|-----|-----|-----|
| NBOP38  | 236 | 236 | 175 | 189 | 204 | 210 | 106 | 158 | 132 | 136 | 164 | 168 | 193 | 193 | 192 | 192 | 251 | 253 | 214 | 214 | 139 | 145 | 165 | 165 |
| NBOP39  | 238 | 238 | 187 | 189 | 210 | 214 | 144 | 160 | 132 | 134 | 166 | 168 | 193 | 193 | 192 | 198 | 253 | 253 | 198 | 214 | 139 | 145 | 149 | 165 |
| NBOP40  | 238 | 238 | 189 | 189 | 208 | 208 | 158 | 176 | 132 | 132 | 166 | 170 | 193 | 193 | 192 | 192 | 253 | 253 | 214 | 218 | 139 | 145 | 165 | 169 |
| NBOP41  | 238 | 238 | 187 | 191 | 200 | 204 | 158 | 174 | 130 | 134 | 164 | 166 | 191 | 191 | 160 | 200 | 253 | 255 | 198 | 214 | 139 | 145 | 149 | 165 |
| NBOP42  | 246 | 246 | 189 | 191 | 174 | 178 | 106 | 158 | 118 | 150 | 164 | 168 | 189 | 193 | 202 | 204 | 253 | 255 | 216 | 216 | 139 | 145 | 167 | 167 |
| NBOP43  | 246 | 246 | 189 | 189 | 174 | 210 | 160 | 178 | 134 | 136 | 166 | 168 | 189 | 191 | 202 | 202 | 253 | 255 | 212 | 214 | 139 | 145 | 163 | 165 |
| NBOP44  | 222 | 222 | 187 | 187 | 200 | 204 | 160 | 174 | 108 | 134 | 166 | 168 | 193 | 193 | 200 | 202 | 251 | 251 | 214 | 214 | 139 | 145 | 165 | 165 |
| NBOP45  | 222 | 222 | 177 | 177 | 200 | 208 | 160 | 176 | 130 | 154 | 166 | 166 | 191 | 191 | 200 | 202 | 253 | 253 | 198 | 214 | 139 | 145 | 149 | 165 |
| NBOP46  | 214 | 214 | 175 | 177 | 190 | 194 | 158 | 174 | 120 | 134 | 162 | 166 | 191 | 191 | 202 | 202 | 253 | 255 | 198 | 214 | 139 | 145 | 149 | 165 |
| NBOP47  | 214 | 214 | 175 | 189 | 190 | 212 | 162 | 172 | 134 | 134 | 166 | 168 | 193 | 193 | 186 | 190 | 251 | 251 | 214 | 216 | 135 | 145 | 165 | 167 |
| NBOP48  | 238 | 238 | 187 | 187 | 190 | 192 | 162 | 182 | 134 | 138 | 164 | 168 | 193 | 193 | 202 | 204 | 253 | 255 | 198 | 214 | 139 | 145 | 149 | 165 |
| NBOP49  | 244 | 244 | 187 | 187 | 202 | 204 | 160 | 176 | 136 | 144 | 162 | 166 | 193 | 193 | 198 | 200 | 251 | 251 | 214 | 216 | 135 | 145 | 165 | 167 |
| NBOP50  | 232 | 236 | 187 | 187 | 190 | 212 | 160 | 174 | 122 | 138 | 166 | 168 | 193 | 193 | 160 | 200 | 253 | 253 | 214 | 218 | 135 | 145 | 165 | 169 |
| NSSMB01 | 230 | 236 | 183 | 185 | 204 | 206 | 172 | 174 | 134 | 136 | 154 | 178 | 191 | 201 | 196 | 210 | 251 | 251 | 214 | 214 | 139 | 145 | 165 | 165 |
| NSSMB02 | 230 | 230 | 181 | 185 | 208 | 210 | 158 | 168 | 124 | 130 | 154 | 154 | 193 | 193 | 194 | 206 | 253 | 253 | 214 | 214 | 139 | 145 | 165 | 165 |
| NSSMB03 | 230 | 230 | 185 | 185 | 206 | 208 | 156 | 160 | 130 | 136 | 182 | 182 | 191 | 191 | 196 | 212 | 253 | 269 | 214 | 216 | 139 | 145 | 165 | 167 |
| NSSMB04 | 230 | 230 | 185 | 185 | 206 | 210 | 156 | 160 | 128 | 132 | 154 | 156 | 191 | 201 | 206 | 206 | 253 | 271 | 214 | 216 | 139 | 145 | 165 | 167 |
| NSSMB05 | 230 | 230 | 181 | 185 | 206 | 210 | 156 | 158 | 132 | 134 | 134 | 154 | 191 | 191 | 196 | 196 | 253 | 253 | 214 | 216 | 139 | 145 | 165 | 167 |
| NSSMB06 | 230 | 234 | 185 | 185 | 206 | 210 | 160 | 172 | 136 | 138 | 154 | 154 | 195 | 195 | 194 | 194 | 251 | 253 | 214 | 214 | 137 | 145 | 165 | 165 |
| NSSMB07 | 230 | 232 | 185 | 206 | 210 | 210 | 158 | 162 | 136 | 138 | 152 | 152 | 191 | 191 | 196 | 204 | 253 | 267 | 214 | 214 | 139 | 145 | 165 | 165 |
| NSSMB08 | 230 | 232 | 183 | 183 | 182 | 212 | 158 | 172 | 132 | 134 | 150 | 154 | 193 | 193 | 200 | 212 | 253 | 267 | 214 | 216 | 139 | 145 | 165 | 167 |
| NSSMB09 | 228 | 230 | 181 | 183 | 208 | 208 | 160 | 172 | 134 | 138 | 152 | 152 | 191 | 193 | 196 | 204 | 251 | 255 | 214 | 214 | 137 | 141 | 165 | 165 |
| NSSMB10 | 232 | 232 | 183 | 185 | 204 | 210 | 160 | 166 | 132 | 132 | 154 | 154 | 191 | 191 | 196 | 204 | 253 | 269 | 214 | 214 | 139 | 145 | 165 | 165 |
| NSSMB11 | 232 | 232 | 183 | 185 | 206 | 210 | 158 | 174 | 128 | 130 | 150 | 158 | 193 | 193 | 196 | 204 | 253 | 253 | 214 | 214 | 139 | 145 | 165 | 165 |
| NSSMB12 | 232 | 232 | 183 | 185 | 206 | 210 | 168 | 174 | 130 | 132 | 154 | 154 | 191 | 193 | 198 | 200 | 253 | 253 | 214 | 214 | 139 | 145 | 165 | 165 |
| NSSMB13 | 232 | 232 | 183 | 191 | 174 | 210 | 158 | 174 | 130 | 132 | 154 | 154 | 191 | 191 | 206 | 212 | 253 | 253 | 214 | 216 | 139 | 145 | 165 | 167 |
| NSSMB14 | 232 | 238 | 185 | 185 | 174 | 188 | 158 | 162 | 128 | 132 | 154 | 154 | 191 | 193 | 212 | 212 | 253 | 269 | 214 | 214 | 139 | 145 | 165 | 165 |
| NSSMB15 | 232 | 232 | 183 | 185 | 188 | 192 | 158 | 160 | 128 | 134 | 154 | 154 | 197 | 201 | 196 | 204 | 255 | 271 | 214 | 214 | 141 | 141 | 165 | 165 |
| NSSMB16 | 230 | 230 | 183 | 183 | 188 | 188 | 156 | 174 | 130 | 134 | 154 | 154 | 191 | 191 | 204 | 204 | 253 | 269 | 214 | 214 | 139 | 145 | 165 | 165 |
| NSSMB17 | 232 | 232 | 183 | 185 | 188 | 188 | 158 | 158 | 130 | 134 | 154 | 154 | 191 | 193 | 194 | 196 | 253 | 253 | 214 | 214 | 139 | 145 | 165 | 165 |
| NSSMB18 | 232 | 238 | 183 | 183 | 200 | 210 | 162 | 172 | 134 | 142 | 150 | 154 | 189 | 191 | 192 | 194 | 255 | 255 | 214 | 214 | 139 | 145 | 165 | 165 |
| NSSMB19 | 226 | 232 | 185 | 185 | 200 | 210 | 158 | 164 | 130 | 134 | 154 | 154 | 189 | 191 | 194 | 206 | 253 | 253 | 216 | 216 | 145 | 145 | 167 | 167 |
| NSSMB20 | 222 | 232 | 181 | 185 | 200 | 210 | 158 | 174 | 132 | 134 | 154 | 154 | 191 | 191 | 196 | 198 | 253 | 253 | 214 | 216 | 139 | 145 | 165 | 167 |
| NSSMB21 | 234 | 234 | 183 | 185 | 176 | 200 | 160 | 174 | 136 | 140 | 152 | 154 | 191 | 191 | 200 | 200 | 253 | 253 | 214 | 216 | 139 | 145 | 165 | 167 |
| NSSMB22 | 232 | 232 | 183 | 183 | 198 | 200 | 162 | 170 | 140 | 142 | 154 | 156 | 189 | 191 | 198 | 204 | 253 | 269 | 214 | 214 | 139 | 145 | 165 | 165 |
| NSSMB23 | 232 | 232 | 183 | 185 | 206 | 208 | 158 | 162 | 134 | 136 | 154 | 156 | 189 | 193 | 196 | 196 | 253 | 269 | 214 | 214 | 135 | 145 | 165 | 165 |
| NSSMB24 | 222 | 232 | 183 | 185 | 202 | 208 | 158 | 162 | 132 | 134 | 154 | 154 | 191 | 193 | 198 | 204 | 253 | 269 | 214 | 214 | 139 | 145 | 165 | 165 |
| NSSMB25 | 232 | 232 | 181 | 183 | 188 | 192 | 160 | 176 | 134 | 136 | 154 | 156 | 189 | 193 | 196 | 208 | 253 | 253 | 214 | 214 | 139 | 145 | 165 | 165 |
| NSSMB26 | 230 | 236 | 183 | 185 | 206 | 208 | 158 | 172 | 134 | 134 | 154 | 154 | 189 | 193 | 196 | 200 | 253 | 253 | 214 | 216 | 139 | 145 | 165 | 167 |
| NSSMB27 | 232 | 234 | 181 | 183 | 188 | 208 | 164 | 164 | 134 | 138 | 152 | 158 | 189 | 193 | 200 | 204 | 253 | 253 | 214 | 240 | 139 | 145 | 165 | 165 |
| NSSMB28 | 230 | 234 | 183 | 185 | 204 | 206 | 160 | 164 | 132 | 136 | 154 | 158 | 189 | 193 | 194 | 194 | 253 | 253 | 214 | 216 | 139 | 145 | 165 | 167 |
| NSSMB29 | 230 | 232 | 181 | 183 | 204 | 208 | 156 | 164 | 132 | 132 | 154 | 156 | 191 | 195 | 196 | 204 | 253 | 253 | 214 | 286 | 139 | 145 | 165 | 165 |
| NSSMB30 | 230 | 232 | 183 | 185 | 204 | 208 | 160 | 164 | 132 | 134 | 152 | 158 | 189 | 193 | 194 | 196 | 253 | 253 | 214 | 214 | 137 | 141 | 165 | 165 |
| NSSMB31 | 230 | 230 | 185 | 185 | 188 | 208 | 172 | 176 | 134 | 136 | 152 | 154 | 189 | 193 | 194 | 204 | 253 | 253 | 214 | 216 | 139 | 145 | 165 | 167 |
| NSSMB32 | 228 | 232 | 183 | 185 | 200 | 202 | 164 | 168 | 130 | 132 | 154 | 154 | 189 | 191 | 196 | 204 | 253 | 269 | 214 | 216 | 139 | 145 | 165 | 167 |
| NSSMB33 | 228 | 232 | 181 | 185 | 184 | 204 | 160 | 166 | 132 | 134 | 152 | 156 | 189 | 193 | 194 | 204 | 253 | 253 | 214 | 216 | 139 | 145 | 165 | 167 |
| NSSMB34 | 230 | 230 | 183 | 183 | 202 | 204 | 158 | 168 | 134 | 138 | 158 | 178 | 193 | 195 | 194 | 202 | 255 | 271 | 214 | 214 | 139 | 145 | 165 | 165 |
| NSSMB35 | 230 | 230 | 181 | 183 | 208 | 208 | 158 | 172 | 134 | 134 | 154 | 156 | 195 | 195 | 194 | 200 | 253 | 253 | 216 | 216 | 139 | 145 | 167 | 167 |
| NSSMB36 | 230 | 230 | 183 | 183 | 188 | 204 | 158 | 174 | 120 | 132 | 154 | 156 | 191 | 195 | 198 | 204 | 253 | 267 | 214 | 216 | 139 | 145 | 165 | 167 |
| NSSMB37 | 230 | 230 | 169 | 185 | 188 | 204 | 156 | 174 | 134 | 134 | 154 | 156 | 189 | 193 | 196 | 196 | 253 | 269 | 214 | 214 | 139 | 145 | 165 | 165 |
| NSSMB38 | 228 | 228 | 169 | 185 | 200 | 204 | 158 | 158 | 134 | 134 | 154 | 154 | 191 | 193 | 194 | 196 | 253 | 269 | 216 | 218 | 139 | 145 | 167 | 169 |
| NSSMB39 | 228 | 228 | 169 | 183 | 188 | 188 | 158 | 176 | 132 | 132 | 154 | 154 | 195 | 195 | 196 | 204 | 253 | 253 | 214 | 214 | 139 | 145 | 165 | 165 |
| NSSMB40 | 228 | 228 | 181 | 183 | 188 | 204 | 156 | 158 | 128 | 134 | 154 | 156 | 191 | 193 | 196 | 196 | 253 | 267 | 214 | 214 | 139 | 145 | 165 | 165 |
| NSSMB41 | 228 | 232 | 183 | 185 | 188 | 188 | 158 | 174 | 132 | 134 | 152 | 152 | 189 | 191 | 196 | 198 | 255 | 269 | 214 | 216 | 137 | 145 | 165 | 167 |
| NSSMB42 | 228 | 230 | 183 | 185 | 188 | 188 | 170 | 174 | 132 | 134 | 154 | 154 | 189 | 191 | 196 | 198 | 255 | 269 | 214 | 214 | 137 | 145 | 165 | 165 |
| NSSMB43 | 230 | 230 | 183 | 183 | 210 | 210 | 174 | 186 | 130 | 134 | 154 | 154 | 191 | 191 | 196 | 198 | 255 | 269 | 214 | 214 | 139 | 145 | 165 | 167 |
| NSSMB44 | 230 | 230 | 171 | 171 | 174 | 174 | 156 | 186 | 130 | 130 | 154 | 154 | 189 | 191 | 200 | 200 | 255 | 269 | 216 | 216 | 139 | 145 | 167 | 167 |
| NSSMB45 | 230 | 230 | 185 | 193 | 190 | 190 | 156 | 186 | 130 | 132 | 152 | 152 | 189 | 191 | 202 | 204 | 253 | 269 | 214 | 216 | 139 | 145 | 165 | 167 |
| NSSMB46 | 228 | 228 | 185 | 185 | 190 | 190 | 158 | 172 | 130 | 132 | 154 | 154 | 193 | 195 | 194 | 198 | 253 | 253 | 214 | 214 | 137 | 137 | 165 | 165 |
| NSSMB47 | 228 | 228 | 185 | 187 | 206 | 208 | 156 | 156 | 128 | 132 | 142 | 156 | 189 | 193 | 196 | 198 | 253 | 253 | 216 | 216 | 139 | 145 | 167 |     |

|        |     |     |     |     |     |     |     |     |     |     |     |     |     |     |     |     |     |     |     |     |     |     |     |     |
|--------|-----|-----|-----|-----|-----|-----|-----|-----|-----|-----|-----|-----|-----|-----|-----|-----|-----|-----|-----|-----|-----|-----|-----|-----|
| NSDL11 | 228 | 228 | 183 | 187 | 190 | 212 | 142 | 152 | 128 | 128 | 166 | 184 | 187 | 191 | 198 | 204 | 253 | 255 | 214 | 214 | 139 | 145 | 165 | 165 |
| NSDL12 | 228 | 230 | 183 | 187 | 202 | 202 | 138 | 138 | 128 | 128 | 166 | 166 | 187 | 191 | 194 | 198 | 253 | 255 | 214 | 216 | 139 | 145 | 165 | 167 |
| NSDL13 | 228 | 230 | 185 | 185 | 208 | 210 | 138 | 138 | 124 | 130 | 166 | 166 | 191 | 191 | 190 | 196 | 251 | 253 | 194 | 214 | 139 | 145 | 165 | 165 |
| NSDL14 | 228 | 228 | 183 | 183 | 206 | 208 | 148 | 148 | 126 | 144 | 166 | 166 | 189 | 189 | 188 | 192 | 253 | 255 | 216 | 216 | 135 | 145 | 167 | 167 |
| NSDL15 | 228 | 230 | 181 | 181 | 186 | 186 | 136 | 140 | 128 | 128 | 166 | 166 | 187 | 191 | 186 | 190 | 251 | 253 | 214 | 216 | 139 | 145 | 165 | 167 |
| NSDL16 | 228 | 230 | 183 | 183 | 190 | 190 | 138 | 154 | 124 | 126 | 164 | 166 | 189 | 191 | 186 | 188 | 253 | 253 | 212 | 214 | 139 | 145 | 163 | 165 |
| NSDL17 | 228 | 230 | 183 | 183 | 182 | 210 | 136 | 154 | 126 | 126 | 166 | 166 | 187 | 189 | 190 | 190 | 255 | 255 | 214 | 214 | 139 | 145 | 165 | 165 |
| NSDL18 | 226 | 230 | 185 | 185 | 206 | 210 | 142 | 142 | 126 | 128 | 164 | 164 | 189 | 191 | 190 | 194 | 255 | 255 | 214 | 216 | 135 | 145 | 165 | 167 |
| NSDL19 | 228 | 234 | 179 | 185 | 190 | 190 | 140 | 140 | 126 | 128 | 166 | 166 | 189 | 189 | 184 | 190 | 253 | 255 | 214 | 216 | 139 | 145 | 165 | 167 |
| NSDL20 | 228 | 238 | 183 | 183 | 202 | 210 | 140 | 146 | 144 | 144 | 166 | 166 | 189 | 189 | 190 | 198 | 253 | 255 | 212 | 216 | 139 | 145 | 163 | 167 |
| NSDL21 | 230 | 234 | 183 | 183 | 204 | 206 | 140 | 142 | 110 | 130 | 166 | 166 | 189 | 199 | 190 | 194 | 253 | 253 | 212 | 216 | 139 | 145 | 163 | 167 |
| NSDL22 | 230 | 234 | 183 | 183 | 206 | 206 | 140 | 140 | 126 | 126 | 166 | 166 | 189 | 199 | 188 | 194 | 251 | 253 | 214 | 214 | 139 | 145 | 165 | 165 |
| NSDL23 | 228 | 232 | 181 | 181 | 206 | 206 | 140 | 140 | 126 | 128 | 166 | 166 | 191 | 191 | 182 | 190 | 251 | 253 | 214 | 216 | 135 | 145 | 165 | 167 |
| NSDL24 | 228 | 228 | 167 | 181 | 182 | 210 | 138 | 154 | 130 | 132 | 168 | 168 | 189 | 191 | 188 | 192 | 251 | 253 | 214 | 214 | 139 | 145 | 165 | 165 |
| NSDL25 | 226 | 230 | 187 | 189 | 190 | 190 | 148 | 152 | 126 | 130 | 168 | 168 | 189 | 193 | 196 | 198 | 251 | 253 | 212 | 216 | 139 | 145 | 163 | 167 |
| NSDL26 | 228 | 230 | 183 | 183 | 184 | 188 | 140 | 152 | 126 | 130 | 166 | 168 | 189 | 189 | 190 | 196 | 247 | 255 | 214 | 216 | 139 | 145 | 165 | 167 |
| NSDL27 | 228 | 230 | 183 | 187 | 192 | 212 | 140 | 148 | 124 | 130 | 166 | 166 | 189 | 189 | 190 | 194 | 251 | 253 | 214 | 214 | 139 | 141 | 165 | 165 |
| NSDL28 | 228 | 230 | 183 | 183 | 210 | 210 | 140 | 140 | 124 | 126 | 166 | 166 | 187 | 189 | 190 | 194 | 251 | 253 | 214 | 216 | 139 | 141 | 165 | 167 |
| NSDL29 | 228 | 230 | 185 | 187 | 210 | 210 | 140 | 140 | 124 | 126 | 166 | 166 | 187 | 189 | 188 | 192 | 253 | 253 | 214 | 214 | 139 | 145 | 165 | 165 |
| NSDL30 | 226 | 230 | 183 | 183 | 192 | 212 | 144 | 152 | 124 | 128 | 166 | 166 | 189 | 191 | 188 | 188 | 253 | 253 | 214 | 216 | 139 | 145 | 165 | 167 |
| NSDL31 | 228 | 228 | 185 | 189 | 210 | 210 | 140 | 154 | 110 | 130 | 166 | 166 | 189 | 189 | 190 | 194 | 251 | 253 | 214 | 216 | 139 | 145 | 165 | 167 |
| NSDL32 | 226 | 238 | 185 | 189 | 206 | 210 | 140 | 140 | 122 | 122 | 170 | 170 | 189 | 199 | 190 | 194 | 251 | 253 | 214 | 214 | 137 | 145 | 165 | 165 |
| NSDL33 | 226 | 228 | 181 | 181 | 206 | 206 | 140 | 142 | 128 | 128 | 166 | 166 | 191 | 191 | 190 | 194 | 251 | 253 | 214 | 216 | 139 | 145 | 165 | 167 |
| NSDL34 | 226 | 228 | 183 | 183 | 212 | 212 | 140 | 140 | 126 | 126 | 166 | 166 | 189 | 189 | 192 | 198 | 253 | 261 | 214 | 216 | 139 | 145 | 165 | 167 |
| NSDL35 | 240 | 242 | 181 | 185 | 208 | 208 | 140 | 140 | 124 | 126 | 166 | 166 | 189 | 191 | 194 | 196 | 253 | 253 | 216 | 216 | 139 | 145 | 167 | 167 |
| NSDL36 | 240 | 242 | 183 | 187 | 204 | 204 | 140 | 142 | 130 | 130 | 166 | 166 | 191 | 191 | 192 | 194 | 253 | 255 | 216 | 216 | 139 | 145 | 167 | 167 |
| NSDL37 | 240 | 242 | 183 | 187 | 208 | 214 | 140 | 142 | 128 | 130 | 166 | 166 | 191 | 191 | 190 | 194 | 253 | 253 | 214 | 218 | 135 | 145 | 165 | 169 |
| NSDL38 | 240 | 242 | 183 | 183 | 212 | 212 | 140 | 140 | 138 | 138 | 166 | 166 | 189 | 189 | 192 | 194 | 251 | 253 | 216 | 218 | 139 | 145 | 167 | 169 |
| NSDL39 | 240 | 242 | 183 | 187 | 192 | 210 | 140 | 140 | 126 | 128 | 166 | 166 | 189 | 189 | 190 | 196 | 251 | 253 | 214 | 218 | 139 | 145 | 165 | 169 |
| NSDL40 | 240 | 242 | 183 | 187 | 210 | 212 | 140 | 152 | 130 | 130 | 166 | 166 | 189 | 189 | 188 | 192 | 253 | 253 | 216 | 222 | 137 | 145 | 167 | 173 |
| NSDL41 | 228 | 228 | 183 | 187 | 204 | 204 | 140 | 140 | 122 | 122 | 166 | 166 | 189 | 189 | 194 | 198 | 251 | 253 | 214 | 216 | 139 | 145 | 165 | 167 |
| NSDL42 | 226 | 230 | 185 | 185 | 208 | 212 | 144 | 154 | 194 | 194 | 166 | 166 | 191 | 191 | 192 | 196 | 253 | 255 | 216 | 216 | 137 | 145 | 167 | 167 |
| NSDL43 | 228 | 232 | 183 | 185 | 194 | 210 | 140 | 150 | 128 | 130 | 166 | 166 | 191 | 191 | 192 | 196 | 251 | 253 | 214 | 218 | 139 | 145 | 165 | 169 |
| NSDL44 | 228 | 230 | 183 | 183 | 190 | 214 | 138 | 140 | 124 | 126 | 166 | 166 | 189 | 191 | 188 | 204 | 253 | 255 | 216 | 216 | 139 | 145 | 167 | 167 |
| NSDL45 | 228 | 228 | 183 | 185 | 212 | 212 | 140 | 146 | 126 | 128 | 166 | 166 | 193 | 193 | 192 | 196 | 251 | 255 | 216 | 216 | 139 | 145 | 167 | 167 |
| NSDL46 | 228 | 228 | 185 | 191 | 220 | 220 | 140 | 140 | 132 | 132 | 166 | 166 | 191 | 191 | 200 | 204 | 253 | 255 | 216 | 216 | 139 | 145 | 167 | 167 |
| NSDL47 | 228 | 228 | 181 | 181 | 212 | 212 | 142 | 154 | 132 | 132 | 164 | 164 | 191 | 193 | 190 | 194 | 253 | 255 | 218 | 218 | 139 | 145 | 169 | 169 |
| NSDL48 | 228 | 228 | 181 | 185 | 204 | 210 | 140 | 140 | 124 | 124 | 166 | 166 | 191 | 193 | 190 | 194 | 251 | 253 | 216 | 216 | 137 | 145 | 167 | 167 |
| NSDL49 | 228 | 230 | 179 | 183 | 204 | 204 | 142 | 140 | 132 | 132 | 166 | 166 | 191 | 191 | 192 | 198 | 253 | 255 | 218 | 218 | 139 | 145 | 169 | 169 |
| NSDL50 | 228 | 230 | 181 | 181 | 192 | 208 | 140 | 140 | 128 | 128 | 168 | 168 | 191 | 191 | 192 | 194 | 255 | 257 | 216 | 216 | 139 | 145 | 167 | 167 |
| NSUM01 | 230 | 236 | 187 | 199 | 210 | 210 | 160 | 160 | 130 | 134 | 182 | 182 | 191 | 191 | 190 | 192 | 251 | 251 | 214 | 216 | 137 | 145 | 165 | 167 |
| NSUM02 | 230 | 230 | 187 | 199 | 200 | 210 | 158 | 162 | 130 | 134 | 182 | 182 | 187 | 187 | 190 | 190 | 251 | 251 | 214 | 216 | 139 | 145 | 165 | 167 |
| NSUM03 | 230 | 230 | 181 | 183 | 206 | 210 | 160 | 176 | 130 | 132 | 182 | 182 | 187 | 187 | 188 | 198 | 251 | 267 | 214 | 214 | 139 | 145 | 165 | 165 |
| NSUM04 | 230 | 230 | 181 | 185 | 202 | 204 | 160 | 176 | 132 | 136 | 182 | 184 | 191 | 191 | 188 | 190 | 251 | 269 | 214 | 214 | 139 | 145 | 165 | 165 |
| NSUM05 | 230 | 230 | 181 | 183 | 208 | 210 | 160 | 176 | 130 | 134 | 180 | 180 | 191 | 191 | 190 | 190 | 251 | 251 | 212 | 214 | 139 | 145 | 165 | 165 |
| NSUM06 | 230 | 234 | 179 | 183 | 206 | 206 | 160 | 172 | 128 | 130 | 180 | 180 | 187 | 189 | 188 | 190 | 251 | 251 | 212 | 214 | 139 | 145 | 163 | 165 |
| NSUM07 | 230 | 230 | 181 | 183 | 190 | 216 | 158 | 160 | 128 | 132 | 182 | 182 | 187 | 187 | 188 | 194 | 251 | 267 | 212 | 214 | 139 | 145 | 163 | 165 |
| NSUM08 | 230 | 232 | 181 | 183 | 200 | 204 | 156 | 160 | 130 | 132 | 180 | 182 | 187 | 187 | 190 | 194 | 251 | 267 | 214 | 214 | 135 | 145 | 165 | 165 |
| NSUM09 | 230 | 230 | 183 | 185 | 194 | 202 | 156 | 160 | 128 | 134 | 180 | 182 | 187 | 187 | 188 | 188 | 251 | 251 | 212 | 214 | 137 | 145 | 163 | 165 |
| NSUM10 | 232 | 232 | 183 | 185 | 206 | 206 | 158 | 158 | 128 | 134 | 182 | 182 | 189 | 189 | 190 | 190 | 253 | 267 | 212 | 214 | 135 | 145 | 163 | 165 |
| NSUM11 | 232 | 232 | 183 | 185 | 194 | 216 | 160 | 176 | 126 | 130 | 180 | 180 | 187 | 187 | 194 | 194 | 253 | 253 | 212 | 214 | 135 | 145 | 163 | 165 |
| NSUM12 | 232 | 232 | 183 | 183 | 194 | 216 | 160 | 160 | 128 | 132 | 182 | 182 | 187 | 189 | 190 | 198 | 253 | 253 | 210 | 214 | 139 | 145 | 161 | 165 |
| NSUM13 | 232 | 232 | 181 | 183 | 190 | 218 | 176 | 176 | 130 | 130 | 180 | 180 | 189 | 189 | 188 | 188 | 253 | 271 | 214 | 214 | 139 | 145 | 165 | 165 |
| NSUM14 | 232 | 238 | 183 | 185 | 196 | 196 | 160 | 176 | 130 | 134 | 178 | 180 | 189 | 199 | 196 | 198 | 253 | 253 | 212 | 214 | 139 | 145 | 163 | 165 |
| NSUM15 | 232 | 232 | 183 | 185 | 206 | 206 | 160 | 160 | 132 | 136 | 180 | 180 | 189 | 199 | 188 | 198 | 253 | 269 | 210 | 214 | 137 | 145 | 161 | 165 |
| NSUM16 | 230 | 232 | 183 | 185 | 208 | 210 | 160 | 160 | 132 | 134 | 180 | 180 | 187 | 189 | 190 | 198 | 255 | 271 | 214 | 216 | 139 | 145 | 165 | 167 |
| NSUM17 | 232 | 232 | 183 | 185 | 208 | 210 | 160 | 174 | 132 | 134 | 178 | 178 | 185 | 189 | 188 | 196 | 255 | 255 | 212 | 216 | 139 | 145 | 163 | 167 |
| NSUM18 | 228 | 232 | 183 | 185 | 208 | 212 | 144 | 154 | 194 | 194 | 166 | 166 | 191 | 191 | 190 | 190 | 253 | 253 | 212 | 214 | 139 | 145 | 163 | 165 |
| NSUM19 | 228 | 232 | 185 | 185 | 188 | 210 | 158 | 160 | 134 | 134 | 176 | 178 | 185 | 185 | 192 | 198 | 255 | 255 | 214 | 216 | 139 | 145 | 165 | 167 |
| NSUM20 | 222 | 232 | 183 | 183 | 174 | 206 | 160 | 174 | 132 | 134 | 178 | 180 | 185 | 185 | 194 | 200 | 255 | 255 | 212 | 214 | 139 | 145 | 163 |     |

|        |     |     |     |     |     |     |     |     |     |     |     |     |     |     |     |     |     |     |     |     |     |     |     |     |
|--------|-----|-----|-----|-----|-----|-----|-----|-----|-----|-----|-----|-----|-----|-----|-----|-----|-----|-----|-----|-----|-----|-----|-----|-----|
| PQTM34 | 228 | 234 | 183 | 185 | 208 | 208 | 158 | 172 | 124 | 126 | 176 | 178 | 195 | 195 | 194 | 194 | 253 | 253 | 216 | 216 | 139 | 145 | 167 | 167 |
| PQTM35 | 228 | 234 | 181 | 183 | 208 | 210 | 144 | 158 | 130 | 132 | 174 | 176 | 191 | 193 | 190 | 192 | 253 | 255 | 214 | 216 | 139 | 145 | 165 | 167 |
| PQTM36 | 214 | 228 | 169 | 185 | 208 | 208 | 168 | 172 | 124 | 126 | 170 | 176 | 189 | 193 | 160 | 200 | 253 | 261 | 198 | 214 | 141 | 145 | 149 | 165 |
| PQTM37 | 226 | 228 | 181 | 183 | 206 | 210 | 158 | 162 | 130 | 132 | 170 | 176 | 191 | 191 | 176 | 190 | 253 | 255 | 214 | 214 | 141 | 145 | 165 | 165 |
| PQTM38 | 226 | 228 | 183 | 185 | 204 | 206 | 160 | 174 | 126 | 128 | 172 | 176 | 191 | 191 | 188 | 198 | 253 | 255 | 214 | 214 | 141 | 145 | 165 | 165 |
| PQTM39 | 226 | 228 | 183 | 185 | 204 | 208 | 158 | 158 | 130 | 132 | 174 | 176 | 191 | 193 | 188 | 200 | 253 | 255 | 214 | 226 | 139 | 145 | 165 | 177 |
| PQTM40 | 226 | 228 | 185 | 185 | 208 | 208 | 158 | 158 | 126 | 128 | 202 | 204 | 189 | 191 | 188 | 190 | 253 | 255 | 216 | 218 | 139 | 145 | 167 | 169 |
| PQTM41 | 228 | 228 | 181 | 183 | 204 | 210 | 144 | 158 | 130 | 132 | 170 | 176 | 189 | 191 | 194 | 206 | 251 | 251 | 216 | 220 | 139 | 145 | 167 | 171 |
| PQTM42 | 228 | 228 | 185 | 185 | 190 | 202 | 158 | 174 | 126 | 128 | 174 | 176 | 189 | 191 | 204 | 204 | 253 | 253 | 218 | 222 | 141 | 145 | 169 | 173 |
| PQTM43 | 214 | 228 | 183 | 183 | 208 | 210 | 158 | 178 | 128 | 130 | 172 | 178 | 189 | 191 | 198 | 200 | 253 | 255 | 216 | 222 | 139 | 145 | 167 | 173 |
| PQTM44 | 228 | 228 | 185 | 185 | 190 | 200 | 158 | 178 | 128 | 130 | 174 | 176 | 191 | 193 | 202 | 202 | 251 | 251 | 218 | 222 | 139 | 145 | 169 | 173 |
| PQTM45 | 228 | 228 | 185 | 185 | 206 | 208 | 168 | 168 | 128 | 132 | 174 | 176 | 191 | 191 | 202 | 202 | 255 | 255 | 216 | 218 | 141 | 145 | 167 | 169 |
| PQTM46 | 228 | 228 | 177 | 177 | 204 | 208 | 170 | 174 | 128 | 132 | 174 | 176 | 191 | 193 | 190 | 190 | 255 | 255 | 216 | 220 | 139 | 145 | 167 | 171 |
| PQTM47 | 228 | 228 | 175 | 189 | 204 | 204 | 158 | 170 | 126 | 128 | 174 | 176 | 193 | 193 | 202 | 204 | 255 | 261 | 212 | 214 | 139 | 145 | 163 | 165 |
| PQTM48 | 228 | 228 | 187 | 187 | 208 | 208 | 172 | 172 | 128 | 130 | 174 | 176 | 195 | 195 | 198 | 200 | 255 | 261 | 214 | 214 | 141 | 145 | 165 | 165 |
| PQTM49 | 228 | 228 | 187 | 187 | 206 | 206 | 162 | 172 | 136 | 138 | 174 | 176 | 193 | 193 | 198 | 200 | 255 | 261 | 198 | 214 | 139 | 145 | 149 | 165 |
| PQTM50 | 228 | 228 | 185 | 185 | 206 | 206 | 172 | 172 | 122 | 122 | 174 | 176 | 195 | 195 | 198 | 200 | 255 | 261 | 198 | 214 | 139 | 145 | 149 | 165 |
| PQCT01 | 228 | 228 | 183 | 183 | 204 | 204 | 158 | 158 | 132 | 132 | 192 | 192 | 189 | 191 | 188 | 188 | 255 | 257 | 214 | 216 | 139 | 145 | 165 | 167 |
| PQCT02 | 228 | 228 | 181 | 183 | 194 | 206 | 158 | 158 | 136 | 136 | 192 | 192 | 189 | 191 | 190 | 192 | 257 | 257 | 214 | 214 | 139 | 145 | 165 | 165 |
| PQCT03 | 222 | 232 | 183 | 185 | 188 | 204 | 158 | 158 | 130 | 130 | 192 | 192 | 189 | 191 | 190 | 190 | 255 | 273 | 214 | 216 | 139 | 145 | 165 | 167 |
| PQCT04 | 228 | 232 | 183 | 183 | 170 | 188 | 160 | 160 | 132 | 132 | 190 | 194 | 189 | 189 | 190 | 198 | 255 | 257 | 210 | 216 | 137 | 143 | 161 | 167 |
| PQCT05 | 222 | 228 | 185 | 185 | 194 | 206 | 174 | 174 | 132 | 132 | 188 | 190 | 189 | 191 | 194 | 198 | 255 | 271 | 212 | 216 | 137 | 145 | 163 | 167 |
| PQCT06 | 228 | 230 | 183 | 185 | 204 | 206 | 164 | 174 | 128 | 128 | 190 | 190 | 177 | 191 | 202 | 202 | 255 | 273 | 214 | 216 | 137 | 145 | 165 | 167 |
| PQCT07 | 228 | 230 | 181 | 181 | 202 | 210 | 170 | 170 | 128 | 130 | 194 | 194 | 191 | 193 | 192 | 198 | 255 | 257 | 214 | 216 | 141 | 145 | 165 | 167 |
| PQCT08 | 226 | 230 | 185 | 187 | 194 | 206 | 158 | 172 | 128 | 130 | 184 | 190 | 175 | 191 | 186 | 188 | 257 | 271 | 206 | 216 | 141 | 145 | 157 | 167 |
| PQCT09 | 228 | 230 | 169 | 185 | 188 | 206 | 158 | 172 | 128 | 132 | 190 | 190 | 189 | 191 | 186 | 188 | 257 | 255 | 212 | 216 | 141 | 145 | 163 | 167 |
| PQCT10 | 228 | 232 | 185 | 187 | 204 | 208 | 158 | 158 | 132 | 132 | 192 | 192 | 191 | 191 | 188 | 192 | 255 | 273 | 214 | 214 | 141 | 141 | 165 | 165 |
| PQCT11 | 234 | 234 | 183 | 183 | 204 | 204 | 176 | 176 | 134 | 134 | 188 | 190 | 175 | 191 | 188 | 190 | 255 | 255 | 214 | 214 | 141 | 145 | 165 | 165 |
| PQCT12 | 228 | 230 | 183 | 187 | 204 | 208 | 182 | 182 | 130 | 130 | 186 | 190 | 177 | 191 | 198 | 204 | 269 | 273 | 212 | 214 | 141 | 145 | 163 | 165 |
| PQCT13 | 228 | 232 | 185 | 187 | 190 | 200 | 158 | 176 | 130 | 134 | 190 | 190 | 189 | 195 | 188 | 200 | 269 | 269 | 214 | 214 | 139 | 145 | 165 | 165 |
| PQCT14 | 228 | 228 | 183 | 185 | 206 | 206 | 158 | 160 | 130 | 134 | 190 | 190 | 189 | 193 | 190 | 190 | 253 | 253 | 214 | 218 | 139 | 145 | 165 | 169 |
| PQCT15 | 228 | 228 | 171 | 183 | 182 | 184 | 160 | 162 | 130 | 130 | 188 | 188 | 179 | 193 | 188 | 198 | 253 | 257 | 212 | 214 | 139 | 145 | 163 | 165 |
| PQCT16 | 228 | 228 | 183 | 187 | 190 | 206 | 160 | 176 | 132 | 136 | 190 | 190 | 193 | 193 | 192 | 200 | 253 | 271 | 212 | 216 | 141 | 145 | 163 | 167 |
| PQCT17 | 228 | 228 | 183 | 183 | 202 | 206 | 174 | 174 | 132 | 136 | 190 | 190 | 191 | 199 | 188 | 194 | 257 | 269 | 212 | 218 | 141 | 145 | 163 | 169 |
| PQCT18 | 228 | 228 | 183 | 185 | 204 | 204 | 162 | 176 | 136 | 136 | 186 | 188 | 191 | 193 | 190 | 190 | 267 | 271 | 214 | 218 | 139 | 145 | 165 | 169 |
| PQCT19 | 228 | 228 | 185 | 191 | 192 | 192 | 176 | 176 | 134 | 134 | 186 | 188 | 191 | 191 | 196 | 196 | 251 | 251 | 214 | 216 | 139 | 145 | 165 | 167 |
| PQCT20 | 228 | 228 | 183 | 185 | 194 | 208 | 160 | 176 | 134 | 134 | 188 | 188 | 189 | 193 | 190 | 200 | 269 | 271 | 212 | 216 | 135 | 145 | 163 | 167 |
| PQCT21 | 226 | 228 | 181 | 185 | 194 | 210 | 160 | 160 | 134 | 134 | 190 | 192 | 189 | 191 | 192 | 194 | 257 | 269 | 212 | 216 | 139 | 145 | 163 | 167 |
| PQCT22 | 228 | 228 | 183 | 183 | 194 | 208 | 158 | 158 | 130 | 134 | 186 | 188 | 177 | 185 | 188 | 190 | 255 | 255 | 214 | 214 | 141 | 145 | 165 | 165 |
| PQCT23 | 222 | 228 | 183 | 183 | 194 | 194 | 150 | 150 | 134 | 134 | 188 | 188 | 187 | 191 | 198 | 198 | 253 | 277 | 212 | 218 | 141 | 145 | 163 | 169 |
| PQCT24 | 228 | 228 | 183 | 185 | 198 | 202 | 158 | 160 | 140 | 140 | 188 | 188 | 189 | 193 | 188 | 200 | 253 | 253 | 214 | 216 | 141 | 141 | 165 | 167 |
| PQCT25 | 226 | 228 | 183 | 185 | 188 | 188 | 144 | 160 | 132 | 132 | 188 | 222 | 177 | 187 | 190 | 190 | 255 | 257 | 214 | 214 | 141 | 145 | 165 | 165 |
| PQCT26 | 226 | 230 | 183 | 185 | 204 | 204 | 160 | 160 | 132 | 140 | 188 | 188 | 189 | 195 | 192 | 198 | 253 | 255 | 214 | 214 | 139 | 141 | 165 | 165 |
| PQCT27 | 226 | 228 | 169 | 183 | 180 | 206 | 176 | 176 | 130 | 134 | 188 | 214 | 177 | 185 | 190 | 198 | 253 | 271 | 216 | 216 | 139 | 145 | 167 | 167 |
| PQCT28 | 226 | 230 | 169 | 185 | 206 | 206 | 160 | 160 | 136 | 136 | 186 | 188 | 189 | 193 | 192 | 200 | 253 | 257 | 214 | 214 | 141 | 145 | 165 | 165 |
| PQCT29 | 226 | 230 | 181 | 181 | 206 | 208 | 176 | 176 | 134 | 136 | 190 | 190 | 187 | 191 | 188 | 200 | 253 | 257 | 214 | 214 | 141 | 145 | 165 | 165 |
| PQCT30 | 228 | 230 | 169 | 185 | 204 | 204 | 174 | 174 | 136 | 136 | 186 | 190 | 185 | 193 | 188 | 200 | 257 | 253 | 214 | 214 | 139 | 145 | 165 | 165 |
| PQCT31 | 228 | 228 | 181 | 183 | 202 | 206 | 158 | 164 | 134 | 134 | 192 | 192 | 185 | 193 | 188 | 190 | 253 | 253 | 214 | 216 | 139 | 145 | 165 | 167 |
| PQCT32 | 228 | 228 | 181 | 185 | 200 | 200 | 174 | 174 | 130 | 130 | 186 | 190 | 187 | 193 | 190 | 198 | 255 | 257 | 212 | 218 | 139 | 145 | 163 | 169 |
| PQCT33 | 228 | 228 | 183 | 185 | 206 | 206 | 158 | 158 | 132 | 132 | 186 | 186 | 189 | 189 | 190 | 190 | 253 | 253 | 214 | 216 | 139 | 145 | 165 | 167 |
| PQCT34 | 228 | 234 | 183 | 185 | 206 | 206 | 158 | 172 | 130 | 130 | 192 | 192 | 189 | 191 | 192 | 192 | 253 | 257 | 214 | 218 | 141 | 145 | 165 | 169 |
| PQCT35 | 228 | 234 | 181 | 183 | 206 | 208 | 144 | 158 | 128 | 128 | 190 | 190 | 189 | 191 | 192 | 194 | 253 | 253 | 214 | 218 | 139 | 145 | 165 | 169 |
| PQCT36 | 228 | 228 | 169 | 185 | 206 | 206 | 168 | 172 | 134 | 134 | 186 | 190 | 189 | 199 | 188 | 190 | 253 | 261 | 214 | 216 | 141 | 145 | 165 | 167 |
| PQCT37 | 226 | 228 | 181 | 183 | 204 | 208 | 162 | 162 | 128 | 128 | 186 | 190 | 191 | 191 | 198 | 198 | 253 | 255 | 214 | 216 | 141 | 145 | 165 | 167 |
| PQCT38 | 226 | 228 | 183 | 185 | 202 | 204 | 160 | 174 | 134 | 134 | 188 | 190 | 191 | 191 | 188 | 198 | 255 | 271 | 214 | 216 | 141 | 145 | 165 | 167 |
| PQCT39 | 226 | 228 | 183 | 185 | 202 | 206 | 158 | 158 | 130 | 130 | 190 | 190 | 189 | 193 | 188 | 200 | 255 | 255 | 214 | 226 | 141 | 145 | 165 | 177 |
| PQCT40 | 226 | 228 | 185 | 185 | 206 | 206 | 158 | 158 | 134 | 134 | 218 | 218 | 191 | 201 | 188 | 190 | 255 | 273 | 216 | 218 | 139 | 145 | 167 | 169 |
| PQCT41 | 228 | 228 | 181 | 183 | 202 | 208 | 158 | 158 | 130 | 130 | 186 | 190 | 189 | 191 | 194 | 200 | 255 | 269 | 216 | 220 | 139 | 145 | 167 | 171 |
| PQCT42 | 228 | 228 | 185 | 185 | 188 | 200 | 174 | 174 | 138 | 138 | 190 | 190 | 189 | 191 | 204 | 204 | 255 | 255 | 218 | 222 | 139 | 145 | 169 | 173 |
| PQCT43 | 228 | 228 | 183 | 183 | 206 | 208 | 158 | 178 | 130 | 130 | 188 | 192 | 189 | 191 | 198 | 200 | 255 | 255 | 216 | 222 | 139 | 145 | 167 |     |

|        |     |     |     |     |     |     |     |     |     |     |     |     |     |     |     |     |     |     |     |     |     |     |     |     |     |
|--------|-----|-----|-----|-----|-----|-----|-----|-----|-----|-----|-----|-----|-----|-----|-----|-----|-----|-----|-----|-----|-----|-----|-----|-----|-----|
| POSS07 | 228 | 228 | 175 | 185 | 212 | 212 | 152 | 162 | 120 | 134 | 164 | 164 | 187 | 193 | 186 | 190 | 255 | 255 | 212 | 216 | 141 | 145 | 163 | 167 |     |
| POSS08 | 226 | 228 | 183 | 183 | 208 | 210 | 154 | 160 | 120 | 130 | 160 | 166 | 187 | 193 | 190 | 194 | 255 | 271 | 212 | 214 | 141 | 145 | 163 | 165 |     |
| POSS09 | 228 | 228 | 183 | 183 | 206 | 210 | 142 | 162 | 132 | 132 | 154 | 164 | 193 | 203 | 190 | 194 | 255 | 255 | 212 | 214 | 141 | 145 | 163 | 165 |     |
| POSS10 | 228 | 234 | 175 | 185 | 210 | 214 | 158 | 162 | 132 | 162 | 164 | 187 | 193 | 188 | 200 | 255 | 255 | 212 | 214 | 141 | 141 | 163 | 165 |     |     |
| POSS11 | 234 | 234 | 183 | 183 | 210 | 210 | 156 | 156 | 120 | 130 | 158 | 166 | 193 | 197 | 188 | 190 | 255 | 255 | 214 | 216 | 141 | 145 | 165 | 167 |     |
| POSS12 | 228 | 228 | 183 | 185 | 194 | 194 | 144 | 158 | 130 | 132 | 158 | 158 | 191 | 193 | 188 | 192 | 255 | 273 | 214 | 214 | 141 | 145 | 165 | 165 |     |
| POSS13 | 246 | 183 | 183 | 190 | 210 | 210 | 152 | 174 | 130 | 130 | 160 | 160 | 205 | 209 | 190 | 196 | 255 | 255 | 214 | 214 | 139 | 145 | 165 | 165 |     |
| POSS14 | 228 | 228 | 183 | 183 | 210 | 210 | 144 | 154 | 132 | 132 | 156 | 166 | 191 | 195 | 190 | 194 | 255 | 255 | 214 | 214 | 139 | 145 | 165 | 165 |     |
| POSS15 | 228 | 228 | 175 | 175 | 190 | 212 | 144 | 156 | 120 | 136 | 164 | 164 | 193 | 207 | 190 | 194 | 255 | 255 | 214 | 216 | 139 | 145 | 165 | 167 |     |
| POSS16 | 228 | 228 | 183 | 185 | 196 | 198 | 142 | 176 | 130 | 130 | 154 | 166 | 193 | 193 | 190 | 202 | 255 | 255 | 214 | 216 | 141 | 145 | 165 | 167 |     |
| POSS17 | 228 | 228 | 183 | 183 | 210 | 214 | 144 | 156 | 130 | 132 | 162 | 166 | 191 | 191 | 190 | 192 | 255 | 255 | 214 | 214 | 141 | 145 | 165 | 165 |     |
| POSS18 | 228 | 228 | 183 | 183 | 198 | 202 | 150 | 150 | 120 | 134 | 160 | 166 | 195 | 207 | 174 | 194 | 255 | 259 | 214 | 216 | 139 | 145 | 165 | 167 |     |
| POSS19 | 228 | 228 | 183 | 185 | 214 | 214 | 144 | 156 | 134 | 136 | 158 | 164 | 193 | 199 | 190 | 192 | 255 | 259 | 214 | 216 | 139 | 145 | 165 | 167 |     |
| POSS20 | 228 | 228 | 175 | 185 | 176 | 208 | 142 | 174 | 130 | 130 | 164 | 166 | 189 | 193 | 190 | 196 | 255 | 255 | 216 | 216 | 135 | 145 | 167 | 167 |     |
| POSS21 | 226 | 228 | 175 | 185 | 182 | 196 | 144 | 170 | 130 | 130 | 158 | 166 | 189 | 193 | 190 | 202 | 255 | 255 | 214 | 216 | 139 | 145 | 165 | 167 |     |
| POSS22 | 228 | 228 | 183 | 185 | 208 | 212 | 146 | 164 | 120 | 134 | 160 | 166 | 189 | 193 | 190 | 200 | 255 | 255 | 214 | 214 | 141 | 145 | 165 | 165 |     |
| POSS23 | 222 | 228 | 183 | 183 | 212 | 212 | 142 | 152 | 130 | 130 | 150 | 158 | 189 | 191 | 194 | 196 | 255 | 261 | 214 | 214 | 141 | 145 | 165 | 165 |     |
| POSS24 | 228 | 228 | 183 | 183 | 192 | 214 | 146 | 158 | 120 | 130 | 154 | 164 | 189 | 191 | 190 | 194 | 255 | 273 | 214 | 216 | 141 | 141 | 165 | 167 |     |
| POSS25 | 228 | 228 | 181 | 181 | 212 | 214 | 142 | 142 | 120 | 136 | 152 | 158 | 189 | 191 | 160 | 190 | 255 | 271 | 214 | 216 | 141 | 145 | 165 | 167 |     |
| POSS26 | 226 | 228 | 181 | 187 | 176 | 212 | 142 | 142 | 120 | 136 | 154 | 164 | 187 | 189 | 202 | 206 | 255 | 261 | 216 | 216 | 139 | 141 | 167 | 167 |     |
| POSS27 | 228 | 228 | 179 | 179 | 188 | 188 | 142 | 160 | 130 | 134 | 156 | 160 | 189 | 191 | 190 | 192 | 255 | 261 | 214 | 214 | 139 | 145 | 165 | 165 |     |
| POSS28 | 228 | 228 | 181 | 181 | 212 | 212 | 144 | 156 | 130 | 134 | 152 | 160 | 191 | 195 | 192 | 200 | 255 | 273 | 214 | 214 | 141 | 145 | 165 | 165 |     |
| POSS29 | 228 | 228 | 183 | 183 | 192 | 210 | 142 | 156 | 130 | 134 | 166 | 168 | 191 | 195 | 196 | 208 | 255 | 255 | 214 | 214 | 141 | 145 | 165 | 165 |     |
| POSS30 | 228 | 228 | 181 | 185 | 192 | 206 | 142 | 148 | 128 | 128 | 152 | 160 | 191 | 193 | 196 | 206 | 255 | 255 | 214 | 214 | 139 | 145 | 165 | 165 |     |
| POSS31 | 226 | 228 | 183 | 183 | 210 | 212 | 144 | 154 | 128 | 132 | 160 | 160 | 187 | 191 | 190 | 194 | 257 | 261 | 214 | 216 | 139 | 145 | 165 | 167 |     |
| POSS32 | 226 | 228 | 181 | 183 | 192 | 192 | 146 | 164 | 132 | 132 | 152 | 158 | 189 | 193 | 192 | 202 | 257 | 275 | 212 | 214 | 139 | 145 | 163 | 165 |     |
| POSS33 | 226 | 228 | 185 | 185 | 194 | 194 | 156 | 156 | 118 | 134 | 162 | 168 | 185 | 191 | 192 | 206 | 257 | 257 | 214 | 214 | 139 | 145 | 165 | 165 |     |
| POSS34 | 226 | 228 | 183 | 183 | 170 | 190 | 144 | 156 | 120 | 132 | 164 | 166 | 189 | 191 | 190 | 192 | 257 | 257 | 214 | 214 | 141 | 145 | 165 | 165 |     |
| POSS35 | 226 | 228 | 183 | 183 | 204 | 204 | 144 | 156 | 130 | 130 | 164 | 166 | 189 | 189 | 190 | 208 | 257 | 257 | 214 | 214 | 139 | 145 | 165 | 165 |     |
| POSS36 | 226 | 228 | 183 | 183 | 194 | 202 | 142 | 156 | 130 | 130 | 158 | 168 | 189 | 191 | 192 | 194 | 255 | 255 | 214 | 214 | 141 | 145 | 165 | 165 |     |
| POSS37 | 226 | 228 | 183 | 183 | 196 | 206 | 156 | 156 | 120 | 128 | 156 | 166 | 185 | 191 | 192 | 194 | 255 | 255 | 212 | 214 | 141 | 145 | 163 | 165 |     |
| POSS38 | 226 | 228 | 183 | 183 | 196 | 206 | 156 | 156 | 130 | 130 | 158 | 166 | 189 | 189 | 192 | 196 | 255 | 255 | 212 | 214 | 141 | 145 | 163 | 165 |     |
| POSS39 | 226 | 228 | 169 | 183 | 196 | 196 | 144 | 154 | 150 | 130 | 130 | 156 | 166 | 185 | 189 | 174 | 208 | 255 | 255 | 212 | 214 | 141 | 145 | 163 | 165 |
| POSS40 | 226 | 228 | 183 | 183 | 186 | 208 | 144 | 156 | 130 | 130 | 156 | 166 | 185 | 189 | 190 | 202 | 255 | 273 | 212 | 214 | 139 | 145 | 163 | 165 |     |
| POSS41 | 228 | 228 | 183 | 183 | 192 | 210 | 142 | 156 | 120 | 134 | 162 | 168 | 187 | 191 | 192 | 194 | 255 | 255 | 190 | 214 | 139 | 145 | 165 | 165 |     |
| POSS42 | 228 | 228 | 185 | 187 | 196 | 212 | 154 | 154 | 130 | 130 | 158 | 166 | 189 | 191 | 192 | 202 | 255 | 255 | 216 | 216 | 139 | 145 | 167 | 167 |     |
| POSS43 | 228 | 228 | 183 | 187 | 204 | 216 | 142 | 156 | 130 | 130 | 186 | 186 | 201 | 201 | 192 | 200 | 255 | 255 | 214 | 214 | 139 | 145 | 165 | 165 |     |
| POSS44 | 228 | 228 | 183 | 183 | 196 | 200 | 144 | 158 | 130 | 130 | 164 | 170 | 187 | 191 | 192 | 200 | 255 | 271 | 216 | 216 | 139 | 145 | 167 | 167 |     |
| POSS45 | 228 | 228 | 183 | 183 | 196 | 200 | 144 | 158 | 130 | 130 | 168 | 168 | 187 | 191 | 192 | 198 | 255 | 255 | 214 | 216 | 139 | 145 | 165 | 167 |     |
| POSS46 | 228 | 228 | 175 | 183 | 200 | 206 | 142 | 172 | 130 | 130 | 168 | 168 | 185 | 189 | 188 | 196 | 255 | 255 | 214 | 214 | 139 | 145 | 165 | 165 |     |
| POSS47 | 228 | 228 | 183 | 183 | 214 | 214 | 142 | 140 | 130 | 130 | 168 | 186 | 185 | 189 | 192 | 198 | 255 | 261 | 214 | 214 | 141 | 145 | 165 | 165 |     |
| POSS48 | 228 | 228 | 175 | 175 | 194 | 202 | 146 | 146 | 130 | 130 | 168 | 186 | 191 | 191 | 192 | 196 | 255 | 261 | 212 | 214 | 141 | 145 | 163 | 165 |     |
| POSS49 | 228 | 228 | 183 | 183 | 186 | 192 | 144 | 158 | 130 | 130 | 164 | 168 | 187 | 191 | 190 | 196 | 255 | 261 | 214 | 214 | 139 | 145 | 165 | 165 |     |
| POSS50 | 228 | 228 | 175 | 175 | 204 | 214 | 154 | 156 | 130 | 130 | 160 | 166 | 193 | 197 | 194 | 196 | 255 | 261 | 212 | 214 | 139 | 145 | 163 | 165 |     |
| QLP01  | 226 | 228 | 183 | 183 | 208 | 208 | 160 | 162 | 122 | 122 | 188 | 188 | 191 | 191 | 186 | 196 | 255 | 259 | 212 | 214 | 139 | 145 | 165 | 167 |     |
| QLP02  | 228 | 234 | 183 | 183 | 198 | 210 | 176 | 178 | 130 | 136 | 188 | 188 | 189 | 191 | 190 | 202 | 255 | 275 | 212 | 212 | 141 | 141 | 165 | 165 |     |
| QLP03  | 228 | 228 | 183 | 183 | 192 | 208 | 174 | 188 | 138 | 138 | 188 | 192 | 191 | 197 | 186 | 196 | 255 | 273 | 212 | 214 | 141 | 141 | 165 | 167 |     |
| QLP04  | 226 | 230 | 179 | 181 | 174 | 192 | 160 | 170 | 130 | 130 | 188 | 192 | 189 | 191 | 188 | 198 | 253 | 257 | 212 | 212 | 141 | 145 | 165 | 165 |     |
| QLP05  | 228 | 228 | 171 | 183 | 198 | 210 | 160 | 160 | 132 | 132 | 178 | 192 | 191 | 193 | 186 | 188 | 255 | 257 | 214 | 214 | 143 | 145 | 167 | 167 |     |
| QLP06  | 228 | 228 | 173 | 183 | 208 | 210 | 162 | 162 | 136 | 140 | 188 | 188 | 191 | 191 | 190 | 192 | 255 | 271 | 212 | 212 | 139 | 145 | 165 | 165 |     |
| QLP07  | 228 | 228 | 171 | 183 | 206 | 214 | 160 | 160 | 138 | 138 | 186 | 190 | 171 | 193 | 186 | 192 | 255 | 255 | 214 | 214 | 141 | 145 | 167 | 167 |     |
| QLP08  | 226 | 230 | 173 | 183 | 198 | 210 | 176 | 176 | 140 | 140 | 180 | 180 | 191 | 193 | 186 | 188 | 255 | 259 | 212 | 214 | 139 | 145 | 165 | 167 |     |
| QLP09  | 228 | 228 | 171 | 183 | 192 | 210 | 162 | 178 | 134 | 134 | 188 | 188 | 191 | 193 | 186 | 192 | 255 | 261 | 212 | 214 | 141 | 145 | 165 | 167 |     |
| QLP10  | 228 | 228 | 183 | 183 | 208 | 212 | 162 | 178 | 134 | 138 | 188 | 188 | 191 | 191 | 188 | 188 | 253 | 257 | 214 | 214 | 139 | 145 | 167 | 167 |     |
| QLP11  | 228 | 228 | 181 | 187 | 208 | 208 | 164 | 164 | 134 | 134 | 188 | 188 | 191 | 193 | 188 | 188 | 255 | 259 | 212 | 212 | 141 | 147 | 165 | 165 |     |
| QLP12  | 228 | 230 | 181 | 189 | 208 | 212 | 176 | 176 | 130 | 130 | 188 | 188 | 191 | 193 | 196 | 204 | 255 | 259 | 214 | 214 | 139 | 145 | 167 | 167 |     |
| QLP13  | 228 | 234 | 173 | 183 | 194 | 204 | 162 | 162 | 120 | 120 | 188 | 188 | 189 | 191 | 186 | 192 | 255 | 257 | 214 | 214 | 141 | 145 | 167 | 167 |     |
| QLP14  | 228 | 228 | 181 | 183 | 210 | 210 | 166 | 176 | 130 | 134 | 188 | 192 | 189 | 191 | 186 | 196 | 257 | 273 | 212 | 212 | 141 | 145 | 165 | 165 |     |
| QLP15  | 228 | 244 | 183 | 185 | 186 | 188 | 162 | 162 | 130 | 134 | 176 | 188 | 191 | 193 | 188 | 188 | 255 | 269 | 212 | 214 | 141 | 145 | 165 | 167 |     |
| QLP16  | 226 | 228 | 183 | 187 | 194 | 210 | 172 | 176 | 128 | 128 | 188 | 188 | 189 | 191 | 186 | 188 | 257 | 273 | 212 | 212 | 139 | 145 | 165 |     |     |

|        |     |     |     |     |     |     |     |     |     |     |     |     |     |     |     |     |     |     |     |     |     |     |     |     |
|--------|-----|-----|-----|-----|-----|-----|-----|-----|-----|-----|-----|-----|-----|-----|-----|-----|-----|-----|-----|-----|-----|-----|-----|-----|
| ONML30 | 228 | 228 | 181 | 185 | 206 | 210 | 166 | 170 | 130 | 130 | 166 | 172 | 189 | 193 | 194 | 202 | 257 | 273 | 214 | 216 | 139 | 145 | 167 | 169 |
| ONML31 | 228 | 228 | 185 | 187 | 206 | 210 | 166 | 170 | 132 | 136 | 166 | 170 | 191 | 193 | 188 | 198 | 259 | 271 | 214 | 216 | 141 | 143 | 167 | 169 |
| ONML32 | 228 | 228 | 185 | 187 | 202 | 206 | 168 | 172 | 128 | 132 | 168 | 170 | 193 | 193 | 188 | 192 | 259 | 271 | 214 | 214 | 141 | 145 | 167 | 167 |
| ONML33 | 228 | 228 | 171 | 185 | 188 | 206 | 164 | 170 | 132 | 134 | 168 | 170 | 189 | 191 | 188 | 192 | 255 | 273 | 214 | 214 | 143 | 143 | 167 | 167 |
| ONML34 | 228 | 228 | 183 | 185 | 216 | 216 | 164 | 170 | 130 | 132 | 166 | 174 | 189 | 193 | 200 | 202 | 259 | 271 | 214 | 214 | 143 | 143 | 167 | 167 |
| ONML35 | 228 | 228 | 181 | 187 | 204 | 218 | 164 | 200 | 132 | 134 | 166 | 172 | 187 | 191 | 190 | 194 | 259 | 271 | 216 | 216 | 141 | 145 | 169 | 169 |
| ONML36 | 226 | 228 | 173 | 185 | 190 | 208 | 164 | 170 | 132 | 136 | 166 | 170 | 189 | 191 | 190 | 198 | 253 | 257 | 214 | 216 | 143 | 145 | 167 | 169 |
| ONML37 | 228 | 228 | 161 | 183 | 186 | 186 | 164 | 168 | 132 | 132 | 168 | 172 | 187 | 188 | 188 | 190 | 257 | 271 | 216 | 216 | 143 | 145 | 169 | 169 |
| ONML38 | 228 | 228 | 173 | 185 | 188 | 196 | 164 | 182 | 132 | 132 | 168 | 172 | 189 | 189 | 186 | 192 | 251 | 259 | 214 | 216 | 143 | 143 | 167 | 169 |
| ONML39 | 226 | 228 | 183 | 185 | 174 | 190 | 168 | 174 | 134 | 134 | 166 | 172 | 187 | 189 | 186 | 190 | 251 | 259 | 214 | 214 | 141 | 143 | 167 | 167 |
| ONML40 | 228 | 228 | 173 | 185 | 188 | 210 | 164 | 168 | 132 | 134 | 168 | 172 | 181 | 191 | 194 | 198 | 253 | 261 | 216 | 216 | 143 | 145 | 169 | 169 |
| ONML41 | 228 | 228 | 183 | 191 | 206 | 212 | 164 | 200 | 132 | 132 | 166 | 172 | 181 | 191 | 194 | 198 | 253 | 261 | 216 | 216 | 143 | 147 | 169 | 169 |
| ONML42 | 228 | 228 | 183 | 185 | 190 | 190 | 170 | 174 | 130 | 132 | 170 | 174 | 189 | 193 | 188 | 190 | 253 | 261 | 214 | 214 | 139 | 145 | 167 | 167 |
| ONML43 | 228 | 228 | 185 | 189 | 190 | 208 | 164 | 198 | 132 | 132 | 170 | 192 | 181 | 191 | 200 | 202 | 259 | 259 | 214 | 214 | 143 | 147 | 167 | 167 |
| ONML44 | 228 | 228 | 183 | 187 | 218 | 218 | 164 | 180 | 130 | 132 | 170 | 184 | 179 | 193 | 200 | 202 | 253 | 259 | 214 | 214 | 143 | 147 | 167 | 167 |
| ONML45 | 228 | 228 | 173 | 185 | 190 | 200 | 166 | 166 | 132 | 132 | 168 | 172 | 189 | 191 | 190 | 198 | 253 | 271 | 214 | 214 | 143 | 147 | 167 | 167 |
| ONML46 | 228 | 228 | 183 | 187 | 210 | 210 | 164 | 164 | 126 | 130 | 168 | 172 | 193 | 197 | 198 | 198 | 269 | 269 | 216 | 218 | 143 | 145 | 169 | 171 |
| ONML47 | 228 | 228 | 173 | 185 | 182 | 206 | 166 | 184 | 132 | 132 | 166 | 172 | 179 | 195 | 192 | 192 | 271 | 271 | 214 | 214 | 143 | 145 | 167 | 167 |
| ONML48 | 228 | 228 | 183 | 185 | 206 | 206 | 168 | 184 | 132 | 132 | 164 | 170 | 183 | 193 | 192 | 192 | 253 | 271 | 214 | 214 | 145 | 145 | 167 | 167 |
| ONML49 | 228 | 228 | 175 | 187 | 206 | 210 | 166 | 184 | 132 | 132 | 166 | 170 | 191 | 191 | 190 | 208 | 253 | 257 | 214 | 214 | 141 | 147 | 167 | 167 |
| ONML50 | 228 | 228 | 185 | 189 | 210 | 210 | 174 | 182 | 132 | 134 | 164 | 170 | 191 | 193 | 198 | 204 | 259 | 259 | 214 | 216 | 143 | 147 | 167 | 169 |
| ONFR01 | 228 | 230 | 183 | 185 | 188 | 208 | 174 | 186 | 134 | 138 | 168 | 172 | 195 | 197 | 188 | 190 | 243 | 259 | 214 | 214 | 141 | 145 | 167 | 167 |
| ONFR02 | 226 | 230 | 183 | 185 | 180 | 206 | 180 | 180 | 140 | 140 | 168 | 168 | 191 | 195 | 192 | 206 | 243 | 259 | 214 | 214 | 141 | 141 | 167 | 167 |
| ONFR03 | 226 | 228 | 171 | 177 | 180 | 208 | 168 | 168 | 124 | 136 | 170 | 172 | 191 | 191 | 190 | 196 | 243 | 259 | 214 | 214 | 143 | 143 | 167 | 167 |
| ONFR04 | 226 | 230 | 171 | 185 | 204 | 206 | 170 | 182 | 134 | 138 | 168 | 172 | 191 | 191 | 188 | 196 | 243 | 261 | 214 | 214 | 143 | 147 | 167 | 167 |
| ONFR05 | 228 | 230 | 179 | 183 | 170 | 208 | 174 | 178 | 136 | 138 | 166 | 166 | 191 | 191 | 188 | 190 | 245 | 261 | 214 | 214 | 141 | 145 | 167 | 167 |
| ONFR06 | 226 | 228 | 183 | 185 | 176 | 206 | 162 | 182 | 136 | 136 | 166 | 166 | 191 | 191 | 184 | 186 | 243 | 261 | 216 | 216 | 141 | 145 | 169 | 169 |
| ONFR07 | 228 | 228 | 181 | 185 | 206 | 206 | 190 | 192 | 138 | 140 | 168 | 168 | 189 | 193 | 184 | 186 | 243 | 259 | 216 | 216 | 143 | 143 | 169 | 169 |
| ONFR08 | 226 | 228 | 183 | 185 | 176 | 210 | 178 | 186 | 134 | 138 | 168 | 168 | 191 | 191 | 170 | 184 | 243 | 261 | 216 | 216 | 143 | 143 | 169 | 169 |
| ONFR09 | 226 | 228 | 185 | 189 | 188 | 220 | 190 | 192 | 138 | 138 | 168 | 168 | 191 | 193 | 186 | 206 | 243 | 261 | 214 | 214 | 139 | 143 | 167 | 167 |
| ONFR10 | 226 | 230 | 183 | 187 | 180 | 210 | 176 | 186 | 138 | 140 | 168 | 168 | 191 | 193 | 190 | 196 | 243 | 261 | 214 | 214 | 141 | 143 | 167 | 167 |
| ONFR11 | 226 | 228 | 183 | 187 | 198 | 200 | 168 | 180 | 120 | 138 | 168 | 168 | 193 | 193 | 196 | 208 | 243 | 261 | 214 | 214 | 141 | 143 | 167 | 167 |
| ONFR12 | 226 | 230 | 185 | 189 | 170 | 172 | 174 | 176 | 138 | 140 | 168 | 168 | 193 | 193 | 184 | 196 | 245 | 261 | 0   | 0   | 143 | 143 | 0   | 0   |
| ONFR13 | 226 | 228 | 171 | 189 | 188 | 210 | 174 | 190 | 138 | 142 | 168 | 168 | 193 | 193 | 196 | 198 | 245 | 263 | 212 | 216 | 143 | 147 | 165 | 169 |
| ONFR14 | 228 | 230 | 183 | 185 | 206 | 208 | 184 | 184 | 142 | 144 | 170 | 170 | 191 | 191 | 186 | 196 | 245 | 261 | 214 | 214 | 141 | 145 | 167 | 167 |
| ONFR15 | 226 | 230 | 183 | 187 | 188 | 210 | 170 | 184 | 138 | 144 | 168 | 168 | 191 | 191 | 186 | 196 | 247 | 261 | 214 | 216 | 143 | 145 | 167 | 169 |
| ONFR16 | 226 | 228 | 183 | 185 | 188 | 188 | 166 | 174 | 130 | 134 | 166 | 166 | 187 | 191 | 188 | 204 | 245 | 261 | 214 | 216 | 145 | 147 | 167 | 169 |
| ONFR17 | 222 | 228 | 181 | 185 | 186 | 206 | 176 | 192 | 136 | 140 | 168 | 168 | 189 | 191 | 186 | 206 | 247 | 259 | 214 | 214 | 143 | 143 | 167 | 167 |
| ONFR18 | 228 | 232 | 185 | 189 | 198 | 202 | 170 | 170 | 136 | 140 | 168 | 172 | 191 | 191 | 184 | 188 | 251 | 259 | 214 | 216 | 141 | 143 | 167 | 169 |
| ONFR19 | 214 | 228 | 177 | 181 | 188 | 188 | 184 | 190 | 140 | 140 | 170 | 170 | 191 | 195 | 188 | 192 | 251 | 261 | 214 | 216 | 143 | 145 | 167 | 169 |
| ONFR20 | 226 | 230 | 183 | 185 | 206 | 210 | 174 | 174 | 138 | 142 | 170 | 174 | 193 | 205 | 186 | 192 | 243 | 263 | 216 | 216 | 141 | 147 | 169 | 169 |
| ONFR21 | 224 | 228 | 171 | 183 | 188 | 206 | 174 | 188 | 136 | 140 | 168 | 168 | 195 | 195 | 170 | 192 | 249 | 261 | 214 | 214 | 141 | 143 | 167 | 167 |
| ONFR22 | 226 | 230 | 183 | 187 | 180 | 202 | 142 | 140 | 140 | 142 | 170 | 170 | 193 | 207 | 194 | 206 | 245 | 263 | 214 | 216 | 143 | 143 | 167 | 169 |
| ONFR23 | 226 | 228 | 181 | 185 | 188 | 204 | 174 | 188 | 138 | 140 | 164 | 164 | 187 | 191 | 186 | 190 | 249 | 259 | 214 | 214 | 143 | 145 | 167 | 167 |
| ONFR24 | 222 | 230 | 187 | 189 | 180 | 210 | 168 | 170 | 136 | 140 | 166 | 166 | 189 | 193 | 188 | 200 | 249 | 263 | 214 | 216 | 143 | 145 | 167 | 167 |
| ONFR25 | 226 | 230 | 185 | 189 | 202 | 210 | 174 | 184 | 140 | 142 | 168 | 170 | 195 | 201 | 188 | 200 | 251 | 257 | 214 | 214 | 143 | 145 | 167 | 167 |
| ONFR26 | 222 | 228 | 177 | 183 | 188 | 206 | 172 | 180 | 136 | 142 | 170 | 172 | 193 | 199 | 186 | 198 | 253 | 257 | 214 | 214 | 143 | 147 | 167 | 167 |
| ONFR27 | 226 | 230 | 181 | 183 | 188 | 226 | 188 | 188 | 138 | 142 | 168 | 172 | 195 | 197 | 186 | 186 | 251 | 259 | 214 | 214 | 143 | 143 | 167 | 167 |
| ONFR28 | 228 | 230 | 183 | 185 | 208 | 216 | 174 | 192 | 136 | 138 | 168 | 170 | 193 | 197 | 186 | 204 | 249 | 259 | 214 | 214 | 141 | 143 | 167 | 167 |
| ONFR29 | 228 | 228 | 183 | 185 | 208 | 216 | 172 | 176 | 134 | 134 | 168 | 172 | 195 | 197 | 186 | 186 | 247 | 263 | 214 | 216 | 143 | 147 | 167 | 169 |
| ONFR30 | 228 | 234 | 183 | 185 | 208 | 216 | 166 | 166 | 136 | 138 | 170 | 172 | 195 | 197 | 190 | 196 | 245 | 245 | 214 | 216 | 139 | 145 | 167 | 169 |
| ONFR31 | 228 | 232 | 185 | 187 | 188 | 208 | 170 | 180 | 120 | 142 | 170 | 174 | 195 | 195 | 182 | 188 | 243 | 243 | 214 | 216 | 141 | 143 | 167 | 169 |
| ONFR32 | 226 | 230 | 183 | 185 | 206 | 226 | 176 | 184 | 140 | 142 | 168 | 170 | 197 | 203 | 184 | 192 | 243 | 263 | 214 | 214 | 141 | 147 | 167 | 167 |
| ONFR33 | 226 | 230 | 185 | 189 | 194 | 208 | 186 | 190 | 142 | 142 | 168 | 168 | 191 | 193 | 186 | 198 | 243 | 269 | 214 | 214 | 141 | 143 | 167 | 167 |
| ONFR34 | 226 | 230 | 183 | 185 | 202 | 204 | 170 | 176 | 138 | 140 | 168 | 168 | 195 | 203 | 186 | 194 | 247 | 261 | 214 | 214 | 141 | 143 | 167 | 167 |
| ONFR35 | 226 | 230 | 183 | 185 | 188 | 210 | 180 | 180 | 136 | 140 | 168 | 172 | 191 | 195 | 186 | 196 | 247 | 261 | 214 | 216 | 143 | 145 | 167 | 169 |
| ONFR36 | 222 | 228 | 183 | 185 | 184 | 186 | 172 | 190 | 142 | 142 | 170 | 170 | 191 | 195 | 184 | 188 | 245 | 263 | 214 | 216 | 143 | 147 | 167 | 169 |
| ONFR37 | 226 | 228 | 183 | 185 | 180 | 200 | 168 | 170 | 136 | 140 | 166 | 174 | 191 | 193 | 188 | 188 | 245 | 245 | 214 | 214 | 139 | 145 | 167 | 167 |
| ONFR38 | 228 | 232 | 183 | 185 | 204 | 204 | 172 | 190 | 136 | 136 | 168 | 170 | 193 | 193 | 184 | 190 | 249 | 261 | 214 | 214 | 143 | 145 | 167 | 167 |
| ONFR39 | 228 | 234 | 183 | 185 | 204 | 206 | 168 | 168 | 136 | 138 | 166 | 170 | 191 | 191 | 186 | 196 | 249 | 261 | 214 | 214 | 141 | 145 | 167 | 167 |

|         |     |     |     |     |     |     |     |     |     |     |     |     |     |     |     |     |     |     |     |     |     |     |     |     |
|---------|-----|-----|-----|-----|-----|-----|-----|-----|-----|-----|-----|-----|-----|-----|-----|-----|-----|-----|-----|-----|-----|-----|-----|-----|
| ONGR03  | 230 | 232 | 179 | 183 | 216 | 216 | 164 | 172 | 132 | 134 | 166 | 166 | 193 | 193 | 188 | 190 | 257 | 259 | 214 | 214 | 145 | 145 | 167 | 167 |
| ONGR04  | 230 | 234 | 179 | 185 | 206 | 206 | 156 | 166 | 130 | 132 | 162 | 164 | 191 | 191 | 190 | 190 | 257 | 259 | 214 | 214 | 145 | 149 | 167 | 167 |
| ONGR05  | 232 | 234 | 183 | 187 | 204 | 204 | 156 | 156 | 130 | 134 | 164 | 166 | 193 | 193 | 192 | 196 | 259 | 261 | 214 | 214 | 143 | 147 | 167 | 167 |
| ONGR06  | 230 | 232 | 181 | 187 | 206 | 210 | 148 | 148 | 132 | 136 | 130 | 168 | 193 | 193 | 190 | 198 | 259 | 261 | 214 | 214 | 143 | 147 | 167 | 167 |
| ONGR07  | 232 | 246 | 185 | 189 | 206 | 206 | 158 | 172 | 128 | 132 | 164 | 166 | 191 | 191 | 188 | 192 | 257 | 275 | 214 | 214 | 143 | 145 | 167 | 167 |
| ONGR08  | 204 | 232 | 183 | 187 | 206 | 210 | 158 | 158 | 132 | 134 | 164 | 166 | 193 | 209 | 160 | 186 | 263 | 265 | 214 | 216 | 141 | 145 | 167 | 169 |
| ONGR09  | 232 | 232 | 183 | 187 | 204 | 208 | 158 | 174 | 128 | 146 | 166 | 168 | 193 | 193 | 188 | 188 | 259 | 271 | 212 | 212 | 141 | 145 | 165 | 169 |
| ONGR10  | 232 | 232 | 185 | 187 | 204 | 208 | 156 | 158 | 132 | 134 | 166 | 166 | 191 | 191 | 188 | 198 | 259 | 279 | 214 | 216 | 143 | 145 | 167 | 169 |
| ONGR11  | 232 | 234 | 185 | 187 | 206 | 210 | 174 | 178 | 134 | 136 | 166 | 166 | 191 | 201 | 190 | 192 | 259 | 263 | 214 | 216 | 143 | 145 | 167 | 169 |
| ONGR12  | 232 | 232 | 183 | 185 | 208 | 212 | 160 | 186 | 132 | 134 | 162 | 164 | 191 | 193 | 188 | 194 | 263 | 263 | 214 | 216 | 145 | 145 | 167 | 169 |
| ONGR13  | 232 | 232 | 175 | 187 | 206 | 212 | 156 | 160 | 126 | 128 | 166 | 192 | 191 | 191 | 190 | 192 | 259 | 263 | 214 | 216 | 143 | 149 | 167 | 169 |
| ONGR14  | 232 | 232 | 183 | 187 | 208 | 212 | 162 | 164 | 126 | 128 | 166 | 192 | 193 | 201 | 192 | 194 | 259 | 279 | 214 | 216 | 143 | 147 | 167 | 169 |
| ONGR15  | 232 | 232 | 183 | 187 | 206 | 208 | 172 | 172 | 124 | 128 | 166 | 168 | 193 | 193 | 192 | 194 | 263 | 265 | 216 | 218 | 145 | 147 | 169 | 171 |
| ONGR16  | 232 | 238 | 183 | 185 | 206 | 210 | 158 | 174 | 126 | 146 | 166 | 168 | 191 | 191 | 190 | 196 | 261 | 267 | 216 | 218 | 143 | 149 | 169 | 171 |
| ONGR17  | 232 | 232 | 185 | 185 | 206 | 208 | 154 | 158 | 130 | 132 | 166 | 166 | 189 | 189 | 190 | 194 | 267 | 269 | 214 | 218 | 141 | 145 | 167 | 171 |
| ONGR18  | 228 | 232 | 183 | 185 | 204 | 208 | 156 | 156 | 128 | 132 | 166 | 168 | 191 | 193 | 192 | 196 | 265 | 269 | 216 | 220 | 143 | 145 | 169 | 173 |
| ONGR19  | 228 | 232 | 179 | 187 | 204 | 206 | 158 | 158 | 130 | 132 | 166 | 168 | 191 | 191 | 194 | 196 | 259 | 259 | 218 | 222 | 145 | 147 | 171 | 175 |
| ONGR20  | 230 | 232 | 183 | 183 | 202 | 210 | 156 | 174 | 130 | 140 | 166 | 166 | 193 | 193 | 188 | 192 | 261 | 277 | 214 | 218 | 143 | 149 | 167 | 171 |
| ONGR21  | 230 | 230 | 183 | 187 | 204 | 208 | 156 | 174 | 128 | 128 | 166 | 166 | 191 | 195 | 188 | 192 | 263 | 265 | 214 | 218 | 143 | 145 | 167 | 171 |
| ONGR22  | 228 | 230 | 187 | 187 | 204 | 208 | 158 | 174 | 128 | 132 | 166 | 166 | 191 | 193 | 186 | 188 | 261 | 267 | 214 | 220 | 145 | 145 | 167 | 173 |
| ONGR23  | 228 | 230 | 183 | 183 | 210 | 212 | 158 | 158 | 130 | 132 | 166 | 166 | 189 | 189 | 190 | 192 | 263 | 267 | 214 | 218 | 145 | 147 | 167 | 171 |
| ONGR24  | 230 | 230 | 183 | 187 | 206 | 210 | 164 | 176 | 126 | 130 | 164 | 166 | 191 | 191 | 188 | 192 | 265 | 269 | 216 | 218 | 143 | 147 | 169 | 171 |
| ONGR25  | 230 | 230 | 181 | 187 | 194 | 210 | 154 | 158 | 130 | 132 | 166 | 166 | 189 | 193 | 190 | 194 | 265 | 267 | 214 | 216 | 145 | 147 | 167 | 169 |
| ONGR26  | 228 | 230 | 185 | 187 | 208 | 214 | 158 | 162 | 130 | 132 | 166 | 166 | 195 | 195 | 188 | 190 | 257 | 263 | 214 | 216 | 145 | 149 | 167 | 169 |
| ONGR27  | 230 | 230 | 185 | 193 | 204 | 210 | 156 | 158 | 122 | 130 | 166 | 168 | 193 | 201 | 188 | 196 | 259 | 265 | 214 | 216 | 145 | 145 | 167 | 169 |
| ONGR28  | 230 | 230 | 185 | 191 | 206 | 206 | 178 | 180 | 130 | 130 | 168 | 168 | 193 | 193 | 190 | 192 | 259 | 263 | 214 | 218 | 143 | 145 | 167 | 171 |
| ONGR29  | 232 | 236 | 185 | 187 | 208 | 208 | 162 | 168 | 130 | 134 | 166 | 168 | 191 | 195 | 188 | 190 | 259 | 263 | 214 | 216 | 143 | 149 | 167 | 169 |
| ONGR30  | 230 | 230 | 185 | 187 | 202 | 204 | 160 | 168 | 132 | 132 | 164 | 166 | 191 | 191 | 188 | 192 | 257 | 273 | 214 | 216 | 141 | 147 | 167 | 169 |
| ONGR31  | 228 | 230 | 171 | 185 | 182 | 192 | 158 | 172 | 130 | 132 | 164 | 166 | 191 | 193 | 162 | 188 | 257 | 267 | 214 | 218 | 143 | 145 | 167 | 171 |
| ONGR32  | 230 | 230 | 181 | 185 | 190 | 206 | 160 | 170 | 128 | 132 | 144 | 166 | 189 | 191 | 186 | 190 | 265 | 269 | 214 | 216 | 141 | 149 | 167 | 169 |
| ONGR33  | 222 | 230 | 181 | 183 | 204 | 204 | 158 | 176 | 134 | 134 | 162 | 166 | 191 | 193 | 186 | 188 | 267 | 271 | 210 | 214 | 141 | 145 | 163 | 167 |
| ONGR34  | 230 | 230 | 171 | 185 | 204 | 208 | 156 | 176 | 134 | 134 | 166 | 166 | 191 | 193 | 186 | 188 | 265 | 269 | 214 | 216 | 143 | 145 | 167 | 169 |
| ONGR35  | 228 | 230 | 183 | 187 | 204 | 204 | 162 | 168 | 130 | 132 | 140 | 166 | 191 | 191 | 186 | 190 | 255 | 257 | 214 | 216 | 145 | 147 | 167 | 169 |
| ONGR36  | 228 | 230 | 187 | 187 | 206 | 208 | 160 | 174 | 108 | 128 | 164 | 168 | 193 | 201 | 186 | 190 | 257 | 261 | 214 | 218 | 145 | 149 | 167 | 171 |
| ONGR37  | 230 | 230 | 187 | 187 | 208 | 212 | 156 | 172 | 128 | 128 | 148 | 166 | 193 | 193 | 160 | 188 | 257 | 263 | 214 | 218 | 141 | 147 | 167 | 171 |
| ONGR38  | 230 | 230 | 181 | 183 | 196 | 210 | 156 | 172 | 130 | 146 | 144 | 166 | 191 | 195 | 180 | 186 | 255 | 259 | 214 | 216 | 145 | 147 | 167 | 169 |
| ONGR39  | 228 | 230 | 171 | 183 | 196 | 210 | 158 | 174 | 128 | 132 | 166 | 166 | 191 | 193 | 186 | 190 | 259 | 265 | 214 | 216 | 143 | 147 | 167 | 169 |
| ONGR40  | 228 | 230 | 183 | 185 | 188 | 210 | 170 | 170 | 130 | 130 | 164 | 166 | 193 | 195 | 186 | 192 | 255 | 265 | 212 | 214 | 143 | 149 | 165 | 167 |
| ONGR41  | 230 | 232 | 181 | 185 | 210 | 210 | 158 | 172 | 130 | 130 | 164 | 166 | 191 | 193 | 186 | 192 | 261 | 265 | 214 | 216 | 143 | 149 | 167 | 169 |
| ONGR42  | 230 | 230 | 179 | 187 | 206 | 210 | 160 | 164 | 130 | 134 | 168 | 168 | 191 | 199 | 186 | 190 | 257 | 263 | 214 | 216 | 141 | 147 | 167 | 169 |
| ONGR43  | 230 | 232 | 187 | 187 | 210 | 210 | 162 | 164 | 134 | 134 | 164 | 166 | 191 | 199 | 188 | 188 | 257 | 265 | 214 | 218 | 145 | 149 | 167 | 171 |
| ONGR44  | 226 | 232 | 183 | 185 | 210 | 214 | 156 | 156 | 134 | 134 | 166 | 168 | 191 | 191 | 186 | 196 | 259 | 265 | 214 | 214 | 145 | 149 | 167 | 167 |
| ONGR45  | 232 | 232 | 185 | 187 | 208 | 214 | 158 | 174 | 130 | 134 | 166 | 166 | 193 | 193 | 160 | 188 | 259 | 265 | 214 | 216 | 145 | 149 | 167 | 169 |
| ONGR46  | 222 | 232 | 187 | 189 | 206 | 210 | 160 | 174 | 128 | 130 | 166 | 166 | 191 | 193 | 186 | 192 | 257 | 267 | 212 | 214 | 145 | 147 | 165 | 167 |
| ONGR47  | 232 | 232 | 185 | 187 | 206 | 210 | 158 | 160 | 130 | 130 | 166 | 166 | 191 | 201 | 184 | 192 | 253 | 253 | 212 | 214 | 143 | 147 | 165 | 167 |
| ONGR48  | 230 | 230 | 185 | 185 | 208 | 210 | 160 | 172 | 130 | 136 | 166 | 168 | 191 | 191 | 160 | 188 | 253 | 253 | 212 | 214 | 147 | 147 | 165 | 167 |
| ONGR49  | 226 | 230 | 183 | 185 | 204 | 206 | 156 | 176 | 128 | 130 | 166 | 166 | 191 | 191 | 192 | 196 | 253 | 253 | 212 | 214 | 143 | 149 | 165 | 167 |
| ONGR50  | 232 | 232 | 181 | 183 | 190 | 208 | 158 | 172 | 128 | 128 | 166 | 166 | 191 | 191 | 190 | 192 | 253 | 253 | 212 | 218 | 145 | 149 | 165 | 171 |
| ONMWL01 | 228 | 228 | 183 | 183 | 208 | 212 | 180 | 184 | 130 | 146 | 166 | 166 | 163 | 191 | 190 | 190 | 255 | 271 | 214 | 216 | 145 | 149 | 167 | 169 |
| ONMWL02 | 222 | 228 | 181 | 183 | 208 | 212 | 150 | 160 | 136 | 148 | 164 | 166 | 191 | 191 | 188 | 198 | 255 | 271 | 214 | 216 | 143 | 147 | 167 | 169 |
| ONMWL03 | 200 | 200 | 183 | 183 | 204 | 210 | 158 | 160 | 148 | 148 | 164 | 164 | 191 | 193 | 188 | 198 | 255 | 255 | 214 | 214 | 143 | 147 | 167 | 167 |
| ONMWL04 | 200 | 228 | 171 | 183 | 210 | 212 | 164 | 174 | 130 | 150 | 164 | 164 | 191 | 191 | 188 | 192 | 255 | 271 | 212 | 216 | 145 | 145 | 165 | 169 |
| ONMWL05 | 226 | 228 | 183 | 183 | 210 | 212 | 160 | 160 | 132 | 150 | 150 | 164 | 191 | 193 | 188 | 196 | 255 | 255 | 214 | 214 | 145 | 145 | 167 | 167 |
| ONMWL06 | 204 | 228 | 183 | 183 | 208 | 224 | 148 | 160 | 128 | 130 | 144 | 164 | 191 | 193 | 192 | 198 | 255 | 255 | 214 | 216 | 139 | 145 | 167 | 169 |
| ONMWL07 | 228 | 242 | 183 | 183 | 210 | 212 | 158 | 174 | 132 | 148 | 162 | 168 | 193 | 199 | 192 | 198 | 255 | 273 | 214 | 214 | 143 | 145 | 167 | 167 |
| ONMWL08 | 200 | 228 | 181 | 183 | 206 | 208 | 162 | 174 | 160 | 168 | 160 | 166 | 191 | 191 | 198 | 200 | 255 | 255 | 214 | 214 | 139 | 145 | 167 | 167 |
| ONMWL09 | 228 | 228 | 185 | 187 | 206 | 212 | 158 | 160 | 128 | 148 | 152 | 166 | 191 | 193 | 188 | 190 | 255 | 255 | 214 | 216 | 143 | 143 | 167 | 169 |
| ONMWL10 | 228 | 228 | 183 | 183 | 210 | 212 | 158 | 160 | 138 | 144 | 162 | 164 | 193 | 193 | 190 | 192 | 255 | 255 | 212 | 216 | 139 | 145 | 165 | 169 |
| ONMWL11 | 228 | 230 | 183 | 185 | 206 | 208 | 158 | 160 | 144 | 154 | 164 | 166 | 193 | 195 | 188 | 198 | 255 | 273 | 214 | 216 | 143 | 147 | 167 | 169 |
| ONMWL12 | 228 | 228 | 181 | 183 | 210 | 210 | 160 | 160 | 128 | 130 | 162 | 166 | 193 | 193 | 188 | 190 | 255 | 255 | 214 | 214 | 139 |     |     |     |



|        |     |     |     |     |     |     |     |     |     |     |     |     |     |     |     |     |     |     |     |     |     |     |     |     |
|--------|-----|-----|-----|-----|-----|-----|-----|-----|-----|-----|-----|-----|-----|-----|-----|-----|-----|-----|-----|-----|-----|-----|-----|-----|
| ONRC26 | 228 | 228 | 183 | 183 | 208 | 208 | 168 | 168 | 128 | 128 | 166 | 168 | 191 | 191 | 164 | 164 | 259 | 265 | 212 | 212 | 143 | 145 | 167 | 167 |
| ONRC27 | 230 | 230 | 181 | 181 | 186 | 208 | 166 | 172 | 130 | 130 | 166 | 170 | 183 | 183 | 184 | 184 | 259 | 261 | 212 | 216 | 143 | 143 | 167 | 167 |
| ONRC28 | 230 | 230 | 185 | 187 | 204 | 210 | 166 | 172 | 130 | 132 | 168 | 168 | 191 | 191 | 194 | 194 | 259 | 261 | 214 | 218 | 141 | 143 | 169 | 169 |
| ONRC29 | 230 | 230 | 195 | 197 | 210 | 210 | 168 | 172 | 132 | 142 | 168 | 168 | 191 | 191 | 194 | 194 | 257 | 259 | 210 | 216 | 143 | 145 | 165 | 171 |
| ONRC30 | 228 | 230 | 185 | 197 | 194 | 206 | 168 | 172 | 136 | 136 | 168 | 168 | 191 | 191 | 192 | 192 | 259 | 259 | 212 | 216 | 139 | 145 | 167 | 171 |
| ONRC31 | 230 | 230 | 185 | 189 | 190 | 190 | 168 | 172 | 132 | 134 | 166 | 170 | 189 | 189 | 192 | 192 | 257 | 259 | 212 | 216 | 141 | 143 | 167 | 171 |
| ONRC32 | 228 | 228 | 185 | 189 | 190 | 206 | 166 | 170 | 132 | 134 | 166 | 170 | 189 | 189 | 192 | 194 | 257 | 261 | 212 | 216 | 141 | 145 | 167 | 169 |
| ONRC33 | 226 | 230 | 185 | 191 | 206 | 210 | 168 | 172 | 130 | 142 | 168 | 168 | 189 | 189 | 192 | 194 | 257 | 261 | 212 | 216 | 141 | 143 | 167 | 169 |
| ONRC34 | 230 | 230 | 183 | 183 | 206 | 206 | 168 | 168 | 134 | 134 | 166 | 170 | 191 | 191 | 188 | 194 | 257 | 261 | 214 | 218 | 141 | 143 | 169 | 173 |
| ONRC35 | 230 | 230 | 183 | 183 | 172 | 190 | 170 | 172 | 128 | 134 | 168 | 168 | 189 | 199 | 199 | 202 | 259 | 261 | 212 | 216 | 137 | 145 | 167 | 171 |
| ONRC36 | 230 | 232 | 183 | 183 | 206 | 210 | 170 | 170 | 130 | 130 | 166 | 168 | 169 | 169 | 188 | 192 | 257 | 261 | 210 | 216 | 143 | 143 | 165 | 169 |
| ONRC37 | 226 | 230 | 183 | 187 | 184 | 200 | 172 | 172 | 138 | 138 | 166 | 170 | 165 | 165 | 190 | 192 | 259 | 259 | 212 | 214 | 139 | 145 | 167 | 169 |
| ONRC38 | 226 | 230 | 185 | 187 | 190 | 208 | 170 | 170 | 130 | 130 | 168 | 168 | 189 | 189 | 190 | 192 | 259 | 259 | 214 | 214 | 143 | 145 | 169 | 169 |
| ONRC39 | 228 | 228 | 185 | 185 | 210 | 210 | 170 | 170 | 122 | 126 | 168 | 168 | 167 | 191 | 190 | 194 | 259 | 259 | 216 | 216 | 141 | 145 | 171 | 171 |
| ONRC40 | 230 | 230 | 183 | 183 | 202 | 202 | 168 | 172 | 116 | 116 | 166 | 170 | 187 | 187 | 190 | 194 | 259 | 261 | 212 | 216 | 143 | 143 | 167 | 171 |
| ONRC41 | 230 | 230 | 183 | 187 | 184 | 202 | 168 | 172 | 128 | 128 | 166 | 170 | 187 | 187 | 190 | 194 | 259 | 261 | 212 | 216 | 143 | 147 | 167 | 171 |
| ONRC42 | 228 | 238 | 183 | 185 | 184 | 184 | 168 | 172 | 130 | 130 | 168 | 168 | 187 | 189 | 190 | 194 | 257 | 261 | 214 | 216 | 139 | 145 | 169 | 171 |
| ONRC43 | 228 | 228 | 181 | 181 | 190 | 190 | 168 | 172 | 134 | 134 | 166 | 170 | 173 | 173 | 192 | 194 | 259 | 261 | 214 | 214 | 143 | 147 | 169 | 169 |
| ONRC44 | 228 | 228 | 181 | 181 | 208 | 208 | 168 | 174 | 134 | 134 | 190 | 190 | 175 | 175 | 190 | 194 | 259 | 265 | 212 | 216 | 143 | 147 | 167 | 171 |
| ONRC45 | 230 | 230 | 181 | 183 | 208 | 208 | 168 | 172 | 130 | 130 | 168 | 170 | 189 | 189 | 192 | 192 | 259 | 265 | 218 | 218 | 143 | 147 | 161 | 163 |
| ONRC46 | 230 | 230 | 181 | 183 | 204 | 208 | 170 | 172 | 130 | 130 | 168 | 168 | 191 | 191 | 192 | 194 | 259 | 261 | 214 | 216 | 143 | 145 | 169 | 171 |
| ONRC47 | 206 | 230 | 183 | 183 | 204 | 204 | 174 | 174 | 130 | 130 | 168 | 168 | 183 | 193 | 196 | 196 | 259 | 259 | 212 | 214 | 141 | 145 | 167 | 169 |
| ONRC48 | 228 | 228 | 183 | 187 | 192 | 196 | 170 | 172 | 132 | 132 | 168 | 168 | 191 | 191 | 192 | 194 | 259 | 259 | 210 | 216 | 145 | 145 | 165 | 171 |
| ONRC49 | 228 | 228 | 183 | 187 | 190 | 190 | 170 | 172 | 132 | 132 | 168 | 168 | 191 | 191 | 192 | 196 | 261 | 263 | 212 | 216 | 141 | 147 | 165 | 167 |
| ONRC50 | 228 | 228 | 183 | 183 | 206 | 206 | 170 | 170 | 128 | 132 | 168 | 194 | 191 | 191 | 192 | 194 | 259 | 261 | 212 | 214 | 143 | 147 | 167 | 169 |
| ONWL01 | 230 | 230 | 185 | 185 | 202 | 206 | 156 | 172 | 136 | 136 | 168 | 168 | 191 | 193 | 194 | 196 | 255 | 271 | 214 | 216 | 143 | 147 | 165 | 167 |
| ONWL02 | 230 | 230 | 183 | 185 | 192 | 210 | 156 | 176 | 124 | 136 | 164 | 164 | 191 | 195 | 192 | 202 | 255 | 271 | 214 | 216 | 145 | 147 | 167 | 169 |
| ONWL03 | 228 | 232 | 185 | 189 | 190 | 202 | 156 | 156 | 124 | 136 | 164 | 164 | 191 | 193 | 192 | 202 | 255 | 255 | 214 | 214 | 147 | 149 | 167 | 167 |
| ONWL04 | 230 | 232 | 171 | 183 | 210 | 212 | 156 | 156 | 136 | 136 | 154 | 164 | 189 | 191 | 192 | 198 | 255 | 271 | 214 | 214 | 145 | 145 | 167 | 167 |
| ONWL05 | 230 | 232 | 185 | 191 | 206 | 208 | 160 | 162 | 136 | 136 | 144 | 164 | 191 | 193 | 190 | 202 | 255 | 255 | 214 | 214 | 143 | 145 | 167 | 167 |
| ONWL06 | 230 | 230 | 183 | 183 | 208 | 224 | 148 | 162 | 128 | 136 | 162 | 168 | 191 | 193 | 196 | 200 | 255 | 255 | 214 | 214 | 145 | 147 | 167 | 167 |
| ONWL07 | 230 | 230 | 185 | 185 | 194 | 212 | 162 | 134 | 134 | 160 | 166 | 193 | 193 | 194 | 202 | 255 | 273 | 214 | 214 | 143 | 143 | 149 | 167 |     |
| ONWL08 | 228 | 230 | 183 | 185 | 190 | 208 | 166 | 166 | 128 | 136 | 152 | 166 | 187 | 191 | 202 | 204 | 255 | 255 | 214 | 214 | 139 | 145 | 167 | 167 |
| ONWL09 | 230 | 232 | 185 | 187 | 206 | 212 | 150 | 162 | 128 | 132 | 162 | 164 | 189 | 191 | 190 | 190 | 255 | 255 | 214 | 216 | 143 | 143 | 167 | 169 |
| ONWL10 | 230 | 230 | 183 | 183 | 210 | 212 | 162 | 166 | 136 | 136 | 164 | 166 | 187 | 193 | 190 | 190 | 255 | 255 | 214 | 214 | 139 | 145 | 167 | 167 |
| ONWL11 | 230 | 230 | 171 | 185 | 182 | 206 | 164 | 190 | 136 | 136 | 162 | 166 | 189 | 193 | 192 | 202 | 255 | 273 | 214 | 214 | 143 | 147 | 167 | 167 |
| ONWL12 | 216 | 230 | 181 | 183 | 210 | 210 | 156 | 156 | 128 | 136 | 162 | 166 | 191 | 191 | 190 | 190 | 255 | 255 | 214 | 216 | 143 | 145 | 167 | 169 |
| ONWL13 | 230 | 230 | 187 | 189 | 206 | 210 | 162 | 162 | 136 | 136 | 162 | 164 | 189 | 191 | 192 | 196 | 255 | 255 | 214 | 216 | 143 | 143 | 167 | 169 |
| ONWL14 | 230 | 230 | 185 | 189 | 190 | 196 | 160 | 160 | 136 | 136 | 162 | 164 | 189 | 209 | 194 | 200 | 255 | 255 | 214 | 214 | 141 | 145 | 167 | 167 |
| ONWL15 | 224 | 230 | 183 | 185 | 192 | 208 | 160 | 160 | 136 | 136 | 164 | 166 | 189 | 189 | 194 | 198 | 255 | 273 | 214 | 214 | 141 | 145 | 167 | 167 |
| ONWL16 | 232 | 234 | 183 | 185 | 204 | 208 | 178 | 178 | 136 | 136 | 144 | 166 | 189 | 191 | 194 | 196 | 255 | 255 | 214 | 214 | 141 | 145 | 167 | 167 |
| ONWL17 | 230 | 234 | 183 | 187 | 190 | 206 | 150 | 160 | 136 | 136 | 144 | 164 | 187 | 193 | 198 | 208 | 255 | 255 | 214 | 216 | 143 | 143 | 167 | 169 |
| ONWL18 | 224 | 232 | 165 | 183 | 172 | 190 | 166 | 166 | 136 | 136 | 144 | 164 | 187 | 191 | 192 | 210 | 255 | 255 | 212 | 214 | 143 | 143 | 165 | 167 |
| ONWL19 | 224 | 224 | 183 | 183 | 190 | 208 | 172 | 172 | 124 | 136 | 166 | 166 | 189 | 191 | 190 | 192 | 253 | 271 | 214 | 214 | 143 | 143 | 167 | 167 |
| ONWL20 | 232 | 232 | 183 | 183 | 190 | 212 | 160 | 160 | 136 | 136 | 164 | 166 | 189 | 190 | 190 | 202 | 255 | 271 | 214 | 214 | 141 | 143 | 167 | 167 |
| ONWL21 | 232 | 232 | 183 | 183 | 194 | 204 | 160 | 160 | 136 | 136 | 164 | 166 | 189 | 189 | 194 | 194 | 255 | 271 | 214 | 216 | 141 | 143 | 167 | 169 |
| ONWL22 | 232 | 232 | 183 | 183 | 194 | 204 | 160 | 160 | 136 | 140 | 166 | 166 | 191 | 191 | 198 | 202 | 255 | 255 | 214 | 216 | 143 | 143 | 167 | 169 |
| ONWL23 | 226 | 232 | 183 | 183 | 198 | 206 | 160 | 174 | 136 | 136 | 164 | 168 | 189 | 191 | 190 | 192 | 255 | 255 | 214 | 214 | 143 | 145 | 167 | 167 |
| ONWL24 | 232 | 236 | 183 | 185 | 194 | 212 | 162 | 178 | 136 | 136 | 166 | 166 | 191 | 195 | 192 | 192 | 255 | 255 | 214 | 214 | 141 | 145 | 167 | 167 |
| ONWL25 | 230 | 232 | 183 | 183 | 182 | 206 | 180 | 190 | 136 | 142 | 168 | 170 | 191 | 193 | 192 | 208 | 255 | 271 | 214 | 216 | 143 | 145 | 167 | 169 |
| ONWL26 | 232 | 232 | 181 | 181 | 182 | 216 | 154 | 168 | 136 | 136 | 168 | 168 | 191 | 193 | 194 | 204 | 255 | 255 | 214 | 214 | 143 | 145 | 167 | 167 |
| ONWL27 | 234 | 234 | 181 | 181 | 214 | 216 | 156 | 156 | 136 | 136 | 168 | 168 | 191 | 193 | 194 | 202 | 255 | 255 | 214 | 216 | 143 | 143 | 167 | 169 |
| ONWL28 | 234 | 234 | 183 | 183 | 190 | 208 | 162 | 164 | 136 | 136 | 168 | 170 | 191 | 193 | 194 | 202 | 255 | 255 | 214 | 214 | 141 | 143 | 167 | 167 |
| ONWL29 | 234 | 234 | 187 | 187 | 190 | 208 | 180 | 198 | 136 | 136 | 168 | 168 | 191 | 193 | 196 | 202 | 253 | 253 | 214 | 214 | 143 | 145 | 167 | 167 |
| ONWL30 | 232 | 234 | 169 | 179 | 188 | 206 | 158 | 178 | 136 | 142 | 166 | 168 | 191 | 193 | 194 | 194 | 253 | 253 | 214 | 214 | 143 | 145 | 167 | 167 |
| ONWL31 | 234 | 234 | 169 | 189 | 188 | 206 | 154 | 154 | 132 | 140 | 132 | 140 | 191 | 193 | 198 | 198 | 255 | 255 | 214 | 214 | 141 | 145 | 167 | 169 |
| ONWL32 | 232 | 232 | 183 | 189 | 208 | 210 | 170 | 170 | 118 | 136 | 162 | 166 | 189 | 189 | 194 | 200 | 255 | 255 | 214 | 216 | 143 | 147 | 167 | 169 |
| ONWL33 | 230 | 234 | 185 | 191 | 190 | 212 | 158 | 164 | 136 | 136 | 154 | 166 | 189 | 190 | 192 | 202 | 255 | 255 | 212 | 212 | 143 | 145 | 165 | 165 |
| ONWL34 | 234 | 234 | 181 | 181 | 208 | 208 | 162 | 180 | 136 | 136 | 162 | 168 | 187 | 189 | 194 | 196 | 255 | 255 | 214 | 214 | 143 | 145 | 167 | 167 |
| ONWL35 | 234 | 234 | 181 | 183 | 192 | 206 | 164 | 196 | 136 | 136 | 152 | 168 | 191 | 191 | 192 | 194 | 255 | 255 | 212 | 212 | 137 | 145 | 165 | 165 |

|         |     |     |     |     |     |     |     |     |     |     |     |     |     |     |     |     |     |     |     |     |     |     |     |     |     |
|---------|-----|-----|-----|-----|-----|-----|-----|-----|-----|-----|-----|-----|-----|-----|-----|-----|-----|-----|-----|-----|-----|-----|-----|-----|-----|
| ONWLW49 | 228 | 232 | 185 | 187 | 204 | 208 | 156 | 158 | 132 | 134 | 166 | 166 | 191 | 191 | 188 | 198 | 259 | 279 | 214 | 216 | 143 | 145 | 167 | 169 |     |
| ONWLW50 | 226 | 230 | 185 | 187 | 204 | 208 | 156 | 158 | 132 | 134 | 166 | 166 | 191 | 191 | 188 | 198 | 259 | 279 | 214 | 216 | 143 | 145 | 167 | 169 |     |
| ONT001  | 230 | 232 | 183 | 187 | 206 | 208 | 156 | 160 | 132 | 138 | 166 | 168 | 191 | 193 | 188 | 192 | 257 | 271 | 214 | 216 | 139 | 145 | 167 | 169 |     |
| ONT002  | 230 | 230 | 183 | 183 | 202 | 204 | 156 | 160 | 120 | 136 | 164 | 168 | 189 | 193 | 190 | 192 | 255 | 271 | 214 | 214 | 145 | 147 | 167 | 167 |     |
| ONT003  | 230 | 230 | 181 | 185 | 200 | 208 | 160 | 164 | 136 | 162 | 166 | 168 | 189 | 193 | 194 | 200 | 257 | 255 | 214 | 216 | 147 | 149 | 167 | 169 |     |
| ONT004  | 216 | 230 | 179 | 183 | 176 | 208 | 154 | 154 | 120 | 132 | 164 | 168 | 191 | 193 | 192 | 196 | 255 | 271 | 212 | 212 | 214 | 145 | 145 | 165 | 167 |
| ONT005  | 230 | 230 | 185 | 185 | 194 | 212 | 152 | 160 | 132 | 138 | 166 | 168 | 189 | 193 | 186 | 188 | 255 | 255 | 212 | 212 | 214 | 143 | 145 | 165 | 167 |
| ONT006  | 230 | 230 | 181 | 185 | 200 | 222 | 152 | 160 | 132 | 134 | 166 | 168 | 187 | 188 | 190 | 255 | 255 | 214 | 214 | 214 | 145 | 147 | 167 | 167 |     |
| ONT007  | 224 | 230 | 183 | 187 | 206 | 208 | 152 | 160 | 130 | 132 | 166 | 168 | 189 | 191 | 194 | 200 | 257 | 273 | 214 | 214 | 141 | 149 | 167 | 167 |     |
| ONT008  | 228 | 230 | 183 | 185 | 204 | 206 | 152 | 160 | 130 | 134 | 166 | 168 | 191 | 191 | 192 | 196 | 255 | 255 | 212 | 214 | 139 | 145 | 165 | 167 |     |
| ONT009  | 230 | 232 | 183 | 187 | 202 | 214 | 152 | 160 | 136 | 136 | 166 | 168 | 189 | 189 | 186 | 188 | 255 | 255 | 214 | 216 | 143 | 143 | 167 | 169 |     |
| ONT010  | 230 | 230 | 183 | 187 | 206 | 206 | 138 | 138 | 132 | 136 | 164 | 166 | 189 | 191 | 188 | 190 | 255 | 255 | 210 | 214 | 137 | 145 | 163 | 167 |     |
| ONT011  | 230 | 230 | 185 | 187 | 182 | 212 | 158 | 164 | 134 | 134 | 164 | 168 | 189 | 195 | 188 | 190 | 257 | 273 | 212 | 214 | 143 | 147 | 165 | 167 |     |
| ONT012  | 216 | 230 | 187 | 191 | 194 | 194 | 156 | 164 | 132 | 136 | 166 | 170 | 187 | 189 | 176 | 190 | 255 | 255 | 212 | 214 | 143 | 145 | 165 | 167 |     |
| ONT013  | 230 | 230 | 181 | 193 | 206 | 210 | 162 | 164 | 134 | 138 | 164 | 166 | 189 | 191 | 192 | 194 | 255 | 255 | 214 | 214 | 143 | 143 | 167 | 167 |     |
| ONT014  | 230 | 230 | 183 | 187 | 206 | 210 | 162 | 166 | 136 | 140 | 166 | 168 | 191 | 193 | 194 | 200 | 255 | 255 | 210 | 214 | 139 | 145 | 163 | 167 |     |
| ONT015  | 230 | 230 | 191 | 197 | 208 | 210 | 162 | 164 | 134 | 136 | 164 | 168 | 189 | 191 | 192 | 196 | 257 | 273 | 212 | 214 | 141 | 145 | 165 | 167 |     |
| ONT016  | 224 | 234 | 191 | 199 | 202 | 210 | 162 | 166 | 140 | 144 | 166 | 168 | 187 | 191 | 186 | 188 | 255 | 255 | 214 | 216 | 141 | 145 | 167 | 169 |     |
| ONT017  | 230 | 234 | 185 | 187 | 198 | 206 | 162 | 164 | 132 | 134 | 164 | 168 | 189 | 191 | 188 | 190 | 255 | 255 | 212 | 216 | 143 | 143 | 165 | 169 |     |
| ONT018  | 224 | 232 | 185 | 189 | 174 | 204 | 162 | 162 | 130 | 160 | 166 | 178 | 189 | 191 | 188 | 190 | 255 | 255 | 214 | 214 | 139 | 143 | 167 | 167 |     |
| ONT019  | 224 | 234 | 187 | 191 | 202 | 208 | 158 | 162 | 132 | 136 | 164 | 168 | 195 | 197 | 188 | 190 | 257 | 271 | 216 | 216 | 143 | 143 | 169 | 169 |     |
| ONT020  | 232 | 232 | 185 | 189 | 202 | 208 | 152 | 162 | 134 | 138 | 164 | 168 | 189 | 193 | 188 | 190 | 255 | 271 | 214 | 216 | 139 | 143 | 167 | 169 |     |
| ONT021  | 232 | 232 | 183 | 189 | 202 | 208 | 154 | 164 | 132 | 136 | 166 | 168 | 189 | 191 | 176 | 190 | 255 | 271 | 212 | 214 | 141 | 143 | 165 | 167 |     |
| ONT022  | 232 | 232 | 185 | 193 | 200 | 210 | 156 | 158 | 130 | 132 | 164 | 168 | 189 | 191 | 192 | 194 | 255 | 255 | 214 | 214 | 143 | 143 | 167 | 167 |     |
| ONT023  | 226 | 232 | 181 | 187 | 202 | 204 | 148 | 154 | 128 | 134 | 166 | 168 | 191 | 197 | 194 | 200 | 253 | 255 | 214 | 216 | 143 | 147 | 167 | 169 |     |
| ONT024  | 232 | 236 | 183 | 185 | 208 | 212 | 152 | 160 | 130 | 136 | 164 | 168 | 193 | 195 | 192 | 196 | 255 | 255 | 214 | 216 | 141 | 145 | 167 | 169 |     |
| ONT025  | 230 | 232 | 185 | 191 | 208 | 214 | 138 | 138 | 130 | 134 | 164 | 170 | 191 | 193 | 186 | 188 | 255 | 271 | 212 | 214 | 143 | 145 | 165 | 167 |     |
| ONT026  | 232 | 232 | 183 | 187 | 176 | 200 | 158 | 164 | 132 | 136 | 168 | 186 | 189 | 191 | 188 | 190 | 255 | 255 | 214 | 218 | 143 | 145 | 167 | 171 |     |
| ONT027  | 234 | 234 | 181 | 187 | 198 | 204 | 156 | 164 | 132 | 140 | 164 | 166 | 189 | 193 | 188 | 190 | 253 | 255 | 214 | 216 | 139 | 143 | 167 | 169 |     |
| ONT028  | 234 | 234 | 183 | 185 | 198 | 200 | 144 | 156 | 134 | 136 | 166 | 168 | 193 | 195 | 176 | 190 | 255 | 255 | 214 | 214 | 141 | 143 | 167 | 167 |     |
| ONT029  | 234 | 234 | 183 | 191 | 200 | 206 | 162 | 164 | 134 | 138 | 166 | 168 | 189 | 193 | 192 | 194 | 253 | 253 | 214 | 216 | 143 | 145 | 167 | 169 |     |
| ONT030  | 232 | 234 | 183 | 187 | 178 | 204 | 166 | 166 | 122 | 134 | 164 | 168 | 189 | 193 | 194 | 200 | 251 | 253 | 214 | 214 | 143 | 145 | 167 | 167 |     |
| ONT031  | 234 | 234 | 181 | 187 | 172 | 202 | 162 | 164 | 130 | 142 | 162 | 170 | 191 | 193 | 192 | 196 | 255 | 255 | 214 | 216 | 139 | 145 | 167 | 169 |     |
| ONT032  | 232 | 232 | 181 | 185 | 188 | 188 | 162 | 166 | 138 | 142 | 166 | 168 | 191 | 197 | 186 | 188 | 255 | 255 | 214 | 216 | 143 | 147 | 167 | 169 |     |
| ONT033  | 230 | 234 | 183 | 189 | 204 | 208 | 162 | 164 | 132 | 136 | 168 | 184 | 189 | 193 | 188 | 190 | 251 | 255 | 214 | 216 | 143 | 145 | 167 | 169 |     |
| ONT034  | 234 | 234 | 185 | 189 | 204 | 204 | 162 | 162 | 128 | 132 | 164 | 168 | 193 | 193 | 198 | 200 | 255 | 255 | 212 | 216 | 143 | 145 | 165 | 169 |     |
| ONT035  | 234 | 234 | 181 | 187 | 200 | 204 | 162 | 164 | 130 | 136 | 166 | 168 | 187 | 193 | 186 | 192 | 255 | 255 | 214 | 216 | 137 | 145 | 167 | 169 |     |
| ONT036  | 234 | 236 | 183 | 187 | 202 | 204 | 164 | 164 | 134 | 138 | 166 | 168 | 191 | 193 | 188 | 192 | 251 | 255 | 214 | 216 | 143 | 143 | 167 | 169 |     |
| ONT037  | 230 | 234 | 185 | 189 | 198 | 200 | 162 | 162 | 130 | 134 | 166 | 168 | 189 | 193 | 190 | 192 | 255 | 255 | 214 | 216 | 139 | 145 | 167 | 169 |     |
| ONT038  | 230 | 234 | 183 | 189 | 190 | 194 | 162 | 164 | 130 | 132 | 166 | 170 | 191 | 195 | 188 | 190 | 255 | 255 | 214 | 214 | 143 | 145 | 167 | 167 |     |
| ONT039  | 232 | 232 | 187 | 193 | 170 | 186 | 164 | 172 | 128 | 134 | 166 | 168 | 191 | 195 | 188 | 190 | 247 | 273 | 214 | 216 | 141 | 145 | 167 | 169 |     |
| ONT040  | 234 | 234 | 187 | 197 | 186 | 190 | 162 | 162 | 130 | 132 | 166 | 168 | 191 | 197 | 176 | 190 | 255 | 271 | 214 | 214 | 139 | 143 | 167 | 167 |     |
| ONT041  | 234 | 234 | 187 | 193 | 182 | 206 | 166 | 174 | 130 | 134 | 166 | 170 | 191 | 195 | 192 | 194 | 255 | 255 | 214 | 216 | 143 | 147 | 167 | 169 |     |
| ONT042  | 232 | 242 | 187 | 193 | 196 | 206 | 168 | 168 | 128 | 132 | 166 | 168 | 193 | 197 | 192 | 200 | 253 | 255 | 212 | 214 | 139 | 145 | 165 | 167 |     |
| ONT043  | 232 | 242 | 187 | 193 | 196 | 206 | 168 | 168 | 128 | 132 | 166 | 168 | 193 | 197 | 192 | 200 | 253 | 255 | 212 | 214 | 141 | 141 | 165 | 167 |     |
| ONT044  | 232 | 232 | 181 | 185 | 172 | 172 | 158 | 158 | 128 | 134 | 166 | 168 | 191 | 199 | 186 | 188 | 255 | 255 | 212 | 216 | 143 | 143 | 165 | 169 |     |
| ONT045  | 232 | 232 | 185 | 189 | 198 | 202 | 154 | 158 | 132 | 136 | 168 | 168 | 201 | 203 | 188 | 190 | 251 | 255 | 214 | 216 | 143 | 147 | 167 | 169 |     |
| ONT046  | 232 | 232 | 181 | 193 | 202 | 204 | 158 | 158 | 132 | 136 | 168 | 170 | 195 | 197 | 196 | 198 | 255 | 255 | 214 | 214 | 141 | 145 | 167 | 167 |     |
| ONT047  | 226 | 232 | 183 | 187 | 200 | 206 | 158 | 158 | 132 | 138 | 166 | 168 | 191 | 195 | 196 | 202 | 257 | 273 | 214 | 216 | 141 | 145 | 167 | 169 |     |
| ONT048  | 232 | 236 | 181 | 185 | 202 | 206 | 158 | 160 | 130 | 136 | 168 | 168 | 193 | 195 | 186 | 190 | 255 | 255 | 214 | 214 | 145 | 145 | 167 | 167 |     |
| ONT049  | 230 | 232 | 179 | 189 | 204 | 208 | 158 | 160 | 132 | 134 | 168 | 170 | 193 | 197 | 186 | 194 | 255 | 255 | 216 | 218 | 141 | 147 | 169 | 171 |     |
| ONT050  | 232 | 232 | 183 | 187 | 194 | 200 | 154 | 158 | 132 | 136 | 166 | 170 | 193 | 195 | 192 | 200 | 247 | 271 | 214 | 216 | 143 | 147 | 167 | 169 |     |
| MEEB01  | 228 | 228 | 187 | 189 | 188 | 206 | 158 | 174 | 130 | 132 | 160 | 164 | 191 | 199 | 190 | 198 | 257 | 257 | 216 | 218 | 141 | 143 | 167 | 169 |     |
| MEEB02  | 214 | 214 | 185 | 193 | 208 | 208 | 160 | 174 | 128 | 132 | 160 | 166 | 187 | 193 | 184 | 192 | 259 | 259 | 212 | 216 | 137 | 145 | 163 | 167 |     |
| MEEB03  | 230 | 230 | 187 | 187 | 178 | 204 | 156 | 174 | 138 | 138 | 162 | 164 | 191 | 201 | 184 | 192 | 257 | 257 | 216 | 216 | 137 | 145 | 167 | 167 |     |
| MEEB04  | 228 | 230 | 187 | 187 | 178 | 204 | 158 | 176 | 138 | 140 | 162 | 166 | 189 | 191 | 186 | 192 | 257 | 261 | 216 | 218 | 139 | 145 | 167 | 169 |     |
| MEEB05  | 230 | 230 | 185 | 191 | 196 | 196 | 156 | 174 | 118 | 130 | 164 | 164 | 191 | 193 | 190 | 192 | 255 | 255 | 212 | 214 | 139 | 145 | 163 | 169 |     |
| MEEB06  | 236 | 236 | 185 | 187 | 180 | 204 | 160 | 174 | 132 | 138 | 162 | 164 | 187 | 191 | 188 | 194 | 257 | 257 | 200 | 218 | 145 | 145 | 151 | 167 |     |
| MEEB07  | 232 | 232 | 187 | 187 | 200 | 200 | 160 | 168 | 130 | 134 | 162 | 164 | 189 | 195 | 192 | 196 | 257 | 259 | 216 | 218 | 139 | 145 | 167 | 169 |     |
| MEEB08  | 230 | 230 | 185 | 187 | 188 | 214 | 172 | 172 | 140 | 142 | 164 | 164 | 189 | 197 | 190 | 198 | 255 | 255 | 216 | 218 | 2   |     |     |     |     |

|         |     |     |     |     |     |     |     |     |     |     |     |     |     |     |     |     |     |     |     |     |     |     |     |     |
|---------|-----|-----|-----|-----|-----|-----|-----|-----|-----|-----|-----|-----|-----|-----|-----|-----|-----|-----|-----|-----|-----|-----|-----|-----|
| MEBSP22 | 232 | 232 | 187 | 189 | 208 | 208 | 146 | 162 | 128 | 130 | 164 | 166 | 199 | 203 | 192 | 198 | 259 | 259 | 214 | 214 | 139 | 145 | 165 | 165 |
| MEBSP23 | 226 | 232 | 185 | 187 | 208 | 208 | 174 | 174 | 140 | 144 | 160 | 164 | 191 | 203 | 188 | 196 | 259 | 261 | 214 | 218 | 139 | 145 | 165 | 169 |
| MEBSP24 | 220 | 232 | 185 | 187 | 176 | 176 | 156 | 160 | 122 | 124 | 164 | 164 | 193 | 195 | 188 | 192 | 253 | 255 | 214 | 214 | 139 | 145 | 165 | 165 |
| MEBSP25 | 232 | 232 | 187 | 189 | 186 | 186 | 160 | 160 | 126 | 130 | 164 | 166 | 189 | 191 | 190 | 198 | 259 | 259 | 214 | 216 | 137 | 145 | 165 | 167 |
| MEBSP26 | 230 | 232 | 189 | 189 | 182 | 204 | 158 | 176 | 132 | 134 | 162 | 164 | 191 | 193 | 188 | 206 | 251 | 255 | 216 | 216 | 139 | 145 | 167 | 167 |
| MEBSP27 | 228 | 230 | 189 | 189 | 178 | 178 | 158 | 174 | 128 | 132 | 162 | 166 | 191 | 193 | 188 | 192 | 259 | 259 | 216 | 216 | 139 | 145 | 167 | 167 |
| MEBSP28 | 232 | 232 | 185 | 189 | 206 | 210 | 158 | 168 | 130 | 132 | 164 | 164 | 187 | 195 | 188 | 200 | 259 | 259 | 214 | 214 | 139 | 145 | 165 | 165 |
| MEBSP29 | 230 | 230 | 187 | 187 | 178 | 204 | 144 | 158 | 122 | 122 | 162 | 164 | 191 | 191 | 192 | 198 | 257 | 257 | 214 | 218 | 139 | 145 | 165 | 167 |
| MEBSP30 | 230 | 236 | 187 | 189 | 206 | 210 | 158 | 174 | 132 | 136 | 164 | 164 | 193 | 195 | 188 | 198 | 255 | 257 | 214 | 216 | 139 | 145 | 165 | 167 |
| MEBSP31 | 232 | 240 | 187 | 189 | 214 | 214 | 158 | 160 | 136 | 136 | 162 | 166 | 187 | 197 | 182 | 192 | 261 | 261 | 216 | 216 | 137 | 145 | 167 | 167 |
| MEBSP32 | 232 | 238 | 187 | 189 | 188 | 214 | 158 | 158 | 138 | 138 | 162 | 164 | 189 | 191 | 192 | 196 | 261 | 261 | 216 | 216 | 139 | 145 | 167 | 167 |
| MEBSP33 | 230 | 230 | 185 | 187 | 182 | 198 | 158 | 172 | 112 | 134 | 164 | 164 | 193 | 195 | 190 | 194 | 251 | 251 | 214 | 214 | 139 | 145 | 165 | 165 |
| MEBSP34 | 238 | 238 | 185 | 187 | 206 | 212 | 158 | 158 | 128 | 132 | 162 | 166 | 189 | 193 | 194 | 198 | 255 | 255 | 214 | 214 | 139 | 145 | 165 | 165 |
| MEBSP35 | 232 | 232 | 175 | 187 | 208 | 210 | 174 | 176 | 130 | 158 | 162 | 164 | 187 | 195 | 188 | 194 | 253 | 253 | 218 | 218 | 139 | 145 | 169 | 169 |
| MEBSP36 | 232 | 232 | 189 | 189 | 214 | 214 | 158 | 158 | 136 | 140 | 164 | 164 | 191 | 199 | 188 | 200 | 261 | 261 | 218 | 218 | 137 | 137 | 169 | 169 |
| MEBSP37 | 230 | 232 | 175 | 187 | 202 | 226 | 164 | 166 | 132 | 134 | 164 | 166 | 187 | 197 | 186 | 190 | 259 | 259 | 214 | 214 | 139 | 145 | 165 | 165 |
| MEBSP38 | 238 | 238 | 185 | 187 | 178 | 188 | 158 | 168 | 126 | 126 | 164 | 166 | 191 | 197 | 188 | 206 | 257 | 257 | 214 | 214 | 139 | 145 | 165 | 165 |
| MEBSP39 | 214 | 214 | 175 | 187 | 214 | 214 | 162 | 162 | 128 | 130 | 164 | 164 | 191 | 195 | 190 | 204 | 253 | 253 | 216 | 216 | 137 | 145 | 167 | 167 |
| MEBSP40 | 232 | 232 | 185 | 189 | 198 | 208 | 158 | 170 | 130 | 132 | 160 | 164 | 187 | 195 | 186 | 192 | 253 | 253 | 216 | 216 | 139 | 145 | 167 | 167 |
| MEBSP41 | 222 | 224 | 187 | 189 | 200 | 200 | 158 | 174 | 130 | 130 | 164 | 164 | 191 | 195 | 188 | 198 | 255 | 255 | 214 | 214 | 139 | 145 | 165 | 165 |
| MEBSP42 | 230 | 230 | 185 | 191 | 196 | 196 | 156 | 174 | 118 | 130 | 162 | 166 | 187 | 195 | 188 | 192 | 251 | 251 | 212 | 214 | 139 | 145 | 163 | 163 |
| MEBSP43 | 230 | 230 | 187 | 189 | 198 | 224 | 158 | 160 | 112 | 130 | 164 | 168 | 191 | 193 | 188 | 196 | 251 | 251 | 214 | 216 | 139 | 145 | 165 | 167 |
| MEBSP44 | 228 | 230 | 187 | 187 | 202 | 208 | 160 | 174 | 130 | 132 | 164 | 164 | 199 | 209 | 188 | 196 | 257 | 261 | 214 | 216 | 139 | 145 | 165 | 167 |
| MEBSP45 | 230 | 230 | 185 | 187 | 208 | 210 | 172 | 172 | 140 | 142 | 164 | 164 | 197 | 199 | 194 | 196 | 255 | 255 | 216 | 216 | 137 | 145 | 167 | 167 |
| MEBSP46 | 230 | 230 | 189 | 191 | 182 | 204 | 144 | 160 | 132 | 136 | 164 | 168 | 187 | 195 | 186 | 190 | 251 | 251 | 216 | 216 | 139 | 145 | 167 | 167 |
| MEBSP47 | 246 | 246 | 185 | 185 | 188 | 192 | 160 | 174 | 130 | 134 | 164 | 164 | 191 | 191 | 184 | 198 | 259 | 259 | 214 | 214 | 139 | 145 | 165 | 165 |
| MEBSP48 | 230 | 232 | 175 | 187 | 208 | 208 | 166 | 166 | 128 | 132 | 162 | 168 | 191 | 195 | 184 | 196 | 259 | 259 | 214 | 216 | 139 | 145 | 165 | 167 |
| MEBSP49 | 230 | 232 | 185 | 185 | 208 | 210 | 160 | 160 | 142 | 146 | 164 | 164 | 193 | 201 | 190 | 198 | 259 | 259 | 214 | 216 | 139 | 145 | 165 | 167 |
| MEBSP50 | 222 | 222 | 185 | 187 | 192 | 200 | 158 | 182 | 130 | 130 | 164 | 164 | 191 | 191 | 196 | 196 | 255 | 255 | 214 | 214 | 139 | 145 | 165 | 165 |
| MASB01  | 228 | 228 | 187 | 187 | 186 | 206 | 158 | 172 | 128 | 132 | 168 | 186 | 193 | 201 | 192 | 200 | 257 | 257 | 214 | 214 | 139 | 145 | 165 | 165 |
| MASB02  | 230 | 230 | 187 | 187 | 206 | 208 | 158 | 158 | 132 | 132 | 170 | 188 | 191 | 193 | 162 | 192 | 259 | 259 | 212 | 214 | 139 | 145 | 163 | 163 |
| MASB03  | 228 | 230 | 187 | 189 | 204 | 208 | 158 | 172 | 126 | 130 | 166 | 188 | 193 | 203 | 162 | 190 | 259 | 261 | 212 | 214 | 139 | 145 | 163 | 165 |
| MASB04  | 230 | 230 | 187 | 189 | 174 | 210 | 158 | 202 | 134 | 138 | 170 | 188 | 193 | 199 | 160 | 190 | 259 | 259 | 212 | 214 | 137 | 143 | 163 | 163 |
| MASB05  | 230 | 230 | 187 | 187 | 174 | 212 | 158 | 172 | 128 | 136 | 170 | 188 | 193 | 195 | 160 | 190 | 255 | 257 | 212 | 212 | 137 | 145 | 163 | 163 |
| MASB06  | 230 | 230 | 187 | 189 | 208 | 208 | 158 | 174 | 130 | 132 | 170 | 188 | 193 | 193 | 160 | 188 | 255 | 271 | 212 | 212 | 137 | 145 | 163 | 163 |
| MASB07  | 230 | 230 | 187 | 189 | 192 | 206 | 158 | 174 | 130 | 132 | 170 | 188 | 193 | 195 | 160 | 188 | 255 | 255 | 212 | 212 | 141 | 145 | 163 | 163 |
| MASB08  | 230 | 230 | 187 | 189 | 202 | 202 | 160 | 172 | 118 | 118 | 170 | 188 | 193 | 195 | 160 | 190 | 255 | 259 | 212 | 212 | 141 | 145 | 163 | 163 |
| MASB09  | 230 | 230 | 187 | 187 | 186 | 226 | 186 | 198 | 120 | 132 | 170 | 188 | 193 | 195 | 160 | 188 | 255 | 261 | 212 | 212 | 141 | 145 | 163 | 163 |
| MASB10  | 228 | 230 | 187 | 189 | 182 | 186 | 158 | 198 | 130 | 134 | 170 | 188 | 189 | 191 | 164 | 190 | 253 | 257 | 212 | 212 | 137 | 141 | 163 | 163 |
| MASB11  | 230 | 236 | 187 | 189 | 192 | 204 | 158 | 176 | 132 | 138 | 176 | 194 | 191 | 193 | 192 | 200 | 257 | 257 | 210 | 212 | 137 | 145 | 161 | 163 |
| MASB12  | 230 | 236 | 187 | 189 | 202 | 206 | 158 | 194 | 130 | 134 | 170 | 194 | 191 | 191 | 164 | 194 | 257 | 257 | 210 | 210 | 141 | 145 | 161 | 161 |
| MASB13  | 230 | 230 | 177 | 187 | 208 | 216 | 158 | 194 | 122 | 146 | 170 | 188 | 171 | 193 | 192 | 200 | 257 | 257 | 212 | 214 | 139 | 145 | 163 | 165 |
| MASB14  | 234 | 238 | 187 | 189 | 190 | 208 | 160 | 186 | 128 | 130 | 174 | 194 | 191 | 193 | 168 | 190 | 253 | 253 | 212 | 212 | 139 | 145 | 163 | 163 |
| MASB15  | 228 | 230 | 187 | 187 | 194 | 206 | 158 | 194 | 130 | 134 | 170 | 188 | 191 | 193 | 188 | 202 | 253 | 255 | 210 | 210 | 139 | 145 | 161 | 161 |
| MASB16  | 230 | 230 | 187 | 189 | 204 | 206 | 158 | 172 | 132 | 132 | 170 | 194 | 191 | 197 | 162 | 194 | 253 | 253 | 212 | 214 | 141 | 145 | 163 | 163 |
| MASB17  | 230 | 236 | 187 | 189 | 194 | 204 | 158 | 184 | 132 | 134 | 170 | 194 | 193 | 193 | 160 | 188 | 253 | 253 | 214 | 214 | 137 | 139 | 165 | 165 |
| MASB18  | 230 | 230 | 185 | 187 | 200 | 204 | 158 | 158 | 146 | 146 | 170 | 188 | 193 | 193 | 188 | 192 | 253 | 257 | 214 | 214 | 139 | 145 | 165 | 165 |
| MASB19  | 230 | 230 | 187 | 187 | 202 | 204 | 160 | 174 | 132 | 132 | 170 | 188 | 193 | 195 | 188 | 198 | 255 | 255 | 212 | 212 | 139 | 145 | 163 | 163 |
| MASB20  | 230 | 230 | 187 | 187 | 170 | 206 | 158 | 180 | 128 | 134 | 170 | 188 | 193 | 195 | 190 | 194 | 255 | 255 | 212 | 212 | 135 | 145 | 163 | 163 |
| MASB21  | 230 | 230 | 187 | 187 | 170 | 204 | 160 | 174 | 132 | 146 | 170 | 188 | 195 | 197 | 160 | 188 | 255 | 255 | 212 | 214 | 139 | 145 | 163 | 163 |
| MASB22  | 228 | 230 | 187 | 189 | 202 | 212 | 190 | 200 | 130 | 136 | 170 | 188 | 193 | 195 | 192 | 206 | 255 | 257 | 216 | 216 | 137 | 139 | 167 | 167 |
| MASB23  | 230 | 230 | 187 | 187 | 170 | 206 | 160 | 166 | 130 | 142 | 168 | 186 | 195 | 195 | 192 | 206 | 255 | 255 | 212 | 212 | 141 | 145 | 163 | 163 |
| MASB24  | 230 | 230 | 187 | 187 | 204 | 204 | 158 | 192 | 130 | 132 | 168 | 186 | 193 | 195 | 188 | 188 | 253 | 253 | 212 | 212 | 139 | 139 | 163 | 163 |
| MASB25  | 228 | 230 | 187 | 187 | 188 | 190 | 160 | 192 | 126 | 132 | 168 | 188 | 193 | 195 | 160 | 188 | 255 | 259 | 214 | 214 | 141 | 145 | 165 | 165 |
| MASB26  | 230 | 230 | 187 | 187 | 188 | 204 | 160 | 174 | 130 | 132 | 170 | 188 | 193 | 193 | 162 | 192 | 261 | 261 | 212 | 214 | 139 | 141 | 163 | 165 |
| MASB27  | 230 | 230 | 187 | 189 | 182 | 208 | 158 | 174 | 130 | 132 | 170 | 188 | 193 | 193 | 194 | 200 | 261 | 261 | 212 | 214 | 139 | 145 | 163 | 165 |
| MASB28  | 232 | 232 | 187 | 189 | 190 | 206 | 158 | 172 | 140 | 146 | 170 | 188 | 193 | 193 | 164 | 206 | 259 | 261 | 212 | 212 | 141 | 145 | 163 | 165 |
| MASB29  | 230 | 232 | 187 | 189 | 182 | 208 | 158 | 176 | 132 | 134 | 172 | 190 | 193 | 197 | 192 | 198 | 259 | 259 | 212 | 214 | 141 | 145 | 163 | 165 |
| MASB30  | 230 | 232 | 187 | 187 | 210 | 210 | 158 | 158 | 132 | 136 | 172 | 190 | 193 | 193 | 192 | 212 | 257 | 273 | 212 | 214 | 139 | 145 | 163 | 165 |
| MASB31  | 232 | 232 | 179 | 189 | 182 | 182 | 192 | 196 | 132 | 146 | 172 | 196 | 189 | 191 | 162 | 194 | 259 | 259 | 212 |     |     |     |     |     |

|        |     |     |     |     |     |     |     |     |     |     |     |     |     |     |     |     |     |     |     |     |     |     |     |     |
|--------|-----|-----|-----|-----|-----|-----|-----|-----|-----|-----|-----|-----|-----|-----|-----|-----|-----|-----|-----|-----|-----|-----|-----|-----|
| NVCM45 | 230 | 230 | 185 | 187 | 206 | 214 | 160 | 162 | 130 | 132 | 162 | 162 | 191 | 191 | 188 | 196 | 233 | 243 | 216 | 216 | 139 | 145 | 167 | 167 |
| NVCM46 | 230 | 230 | 185 | 187 | 192 | 220 | 158 | 162 | 132 | 154 | 182 | 182 | 195 | 197 | 188 | 196 | 239 | 259 | 216 | 216 | 143 | 145 | 167 | 167 |
| NVCM47 | 230 | 230 | 185 | 185 | 208 | 220 | 160 | 162 | 128 | 128 | 162 | 194 | 195 | 195 | 194 | 194 | 239 | 263 | 214 | 214 | 141 | 145 | 165 | 165 |
| NVCM48 | 230 | 230 | 185 | 185 | 172 | 172 | 158 | 162 | 126 | 130 | 184 | 184 | 195 | 195 | 186 | 186 | 243 | 257 | 216 | 216 | 141 | 137 | 167 | 167 |
| NVCM49 | 230 | 230 | 181 | 183 | 206 | 212 | 172 | 172 | 136 | 138 | 180 | 180 | 193 | 193 | 186 | 186 | 243 | 257 | 214 | 214 | 139 | 145 | 165 | 165 |
| NVCM50 | 230 | 230 | 179 | 185 | 206 | 214 | 158 | 174 | 132 | 134 | 178 | 192 | 193 | 193 | 184 | 184 | 239 | 249 | 212 | 212 | 141 | 143 | 163 | 163 |
| NHDF01 | 228 | 228 | 183 | 187 | 202 | 210 | 166 | 168 | 138 | 142 | 166 | 168 | 193 | 201 | 186 | 188 | 257 | 257 | 214 | 218 | 141 | 143 | 165 | 165 |
| NHDF02 | 230 | 230 | 185 | 185 | 190 | 208 | 166 | 166 | 142 | 144 | 168 | 168 | 191 | 191 | 188 | 194 | 259 | 259 | 214 | 218 | 139 | 145 | 165 | 165 |
| NHDF03 | 228 | 230 | 175 | 185 | 188 | 200 | 166 | 166 | 138 | 156 | 166 | 168 | 193 | 203 | 186 | 200 | 255 | 255 | 214 | 218 | 139 | 145 | 165 | 165 |
| NHDF04 | 230 | 230 | 185 | 187 | 202 | 208 | 166 | 166 | 168 | 160 | 166 | 168 | 193 | 195 | 188 | 192 | 255 | 261 | 212 | 216 | 137 | 143 | 163 | 167 |
| NHDF05 | 230 | 230 | 183 | 183 | 200 | 208 | 166 | 168 | 130 | 144 | 168 | 168 | 193 | 195 | 190 | 194 | 255 | 267 | 212 | 216 | 141 | 145 | 163 | 167 |
| NHDF06 | 230 | 230 | 183 | 185 | 198 | 206 | 166 | 166 | 146 | 148 | 166 | 168 | 193 | 193 | 194 | 196 | 255 | 259 | 214 | 216 | 137 | 145 | 165 | 167 |
| NHDF07 | 230 | 230 | 185 | 187 | 202 | 208 | 164 | 166 | 156 | 158 | 166 | 166 | 193 | 195 | 190 | 196 | 257 | 263 | 212 | 220 | 141 | 145 | 163 | 171 |
| NHDF08 | 228 | 230 | 183 | 191 | 200 | 210 | 166 | 166 | 154 | 154 | 166 | 168 | 193 | 195 | 188 | 190 | 257 | 257 | 214 | 216 | 141 | 145 | 165 | 167 |
| NHDF09 | 230 | 236 | 183 | 183 | 204 | 206 | 166 | 166 | 154 | 154 | 166 | 168 | 193 | 195 | 188 | 196 | 255 | 257 | 216 | 218 | 141 | 145 | 167 | 169 |
| NHDF10 | 230 | 236 | 183 | 191 | 200 | 204 | 166 | 166 | 158 | 160 | 166 | 168 | 193 | 195 | 188 | 188 | 255 | 259 | 212 | 214 | 137 | 141 | 163 | 165 |
| NHDF11 | 230 | 230 | 185 | 189 | 202 | 204 | 164 | 166 | 132 | 136 | 168 | 168 | 193 | 195 | 186 | 188 | 255 | 259 | 216 | 218 | 139 | 145 | 167 | 169 |
| NHDF12 | 230 | 236 | 185 | 187 | 202 | 204 | 164 | 166 | 154 | 156 | 166 | 166 | 193 | 193 | 188 | 204 | 255 | 257 | 212 | 218 | 141 | 145 | 163 | 169 |
| NHDF13 | 230 | 230 | 185 | 193 | 200 | 200 | 164 | 166 | 138 | 138 | 164 | 168 | 193 | 195 | 192 | 196 | 253 | 261 | 214 | 218 | 139 | 145 | 165 | 169 |
| NHDF14 | 234 | 238 | 185 | 185 | 202 | 204 | 166 | 166 | 138 | 142 | 168 | 168 | 193 | 193 | 192 | 192 | 257 | 273 | 216 | 218 | 141 | 141 | 167 | 169 |
| NHDF15 | 228 | 230 | 175 | 187 | 204 | 204 | 168 | 170 | 120 | 160 | 166 | 170 | 193 | 195 | 188 | 202 | 255 | 259 | 214 | 216 | 141 | 143 | 165 | 167 |
| NHDF16 | 230 | 236 | 183 | 185 | 198 | 202 | 170 | 174 | 138 | 138 | 160 | 166 | 193 | 195 | 186 | 188 | 257 | 273 | 214 | 216 | 141 | 145 | 165 | 167 |
| NHDF17 | 230 | 236 | 175 | 187 | 172 | 206 | 166 | 168 | 138 | 156 | 168 | 168 | 193 | 193 | 186 | 196 | 255 | 257 | 214 | 216 | 137 | 139 | 165 | 167 |
| NHDF18 | 230 | 230 | 173 | 185 | 188 | 202 | 166 | 168 | 120 | 138 | 166 | 166 | 193 | 193 | 190 | 192 | 255 | 255 | 214 | 220 | 139 | 145 | 165 | 171 |
| NHDF19 | 230 | 230 | 185 | 187 | 206 | 210 | 164 | 166 | 138 | 156 | 166 | 166 | 193 | 195 | 188 | 200 | 255 | 255 | 212 | 220 | 141 | 145 | 163 | 171 |
| NHDF20 | 230 | 230 | 183 | 187 | 196 | 208 | 168 | 174 | 152 | 154 | 166 | 168 | 193 | 195 | 188 | 188 | 255 | 255 | 214 | 220 | 141 | 145 | 165 | 171 |
| NHDF21 | 230 | 230 | 185 | 187 | 206 | 210 | 166 | 168 | 154 | 156 | 166 | 166 | 195 | 197 | 188 | 194 | 255 | 255 | 214 | 218 | 139 | 145 | 165 | 169 |
| NHDF22 | 228 | 230 | 183 | 185 | 198 | 212 | 166 | 168 | 156 | 158 | 166 | 168 | 193 | 195 | 196 | 196 | 255 | 257 | 214 | 218 | 137 | 139 | 165 | 169 |
| NHDF23 | 230 | 230 | 183 | 187 | 200 | 212 | 168 | 170 | 136 | 156 | 166 | 166 | 195 | 195 | 188 | 206 | 255 | 255 | 216 | 220 | 141 | 145 | 167 | 171 |
| NHDF24 | 230 | 230 | 183 | 187 | 180 | 206 | 168 | 170 | 142 | 150 | 166 | 166 | 193 | 195 | 194 | 196 | 253 | 253 | 214 | 220 | 139 | 139 | 165 | 171 |
| NHDF25 | 228 | 230 | 183 | 185 | 190 | 204 | 168 | 170 | 136 | 136 | 164 | 164 | 193 | 195 | 184 | 186 | 255 | 259 | 214 | 218 | 141 | 145 | 165 | 169 |
| NHDF26 | 230 | 230 | 183 | 183 | 188 | 202 | 166 | 170 | 136 | 156 | 166 | 166 | 193 | 193 | 184 | 188 | 257 | 259 | 214 | 218 | 139 | 141 | 165 | 169 |
| NHDF27 | 230 | 230 | 169 | 183 | 190 | 202 | 166 | 168 | 154 | 154 | 166 | 166 | 193 | 193 | 190 | 196 | 257 | 257 | 214 | 220 | 141 | 145 | 165 | 171 |
| NHDF28 | 230 | 230 | 183 | 185 | 190 | 190 | 164 | 166 | 138 | 142 | 168 | 168 | 193 | 193 | 196 | 198 | 257 | 259 | 216 | 220 | 141 | 145 | 167 | 171 |
| NHDF29 | 230 | 230 | 183 | 191 | 192 | 196 | 166 | 166 | 138 | 154 | 168 | 170 | 193 | 197 | 190 | 196 | 259 | 259 | 214 | 218 | 141 | 145 | 165 | 169 |
| NHDF30 | 232 | 232 | 185 | 187 | 176 | 188 | 166 | 174 | 154 | 156 | 166 | 166 | 193 | 193 | 190 | 192 | 259 | 259 | 214 | 216 | 139 | 145 | 165 | 167 |
| NHDF31 | 230 | 232 | 185 | 187 | 188 | 190 | 164 | 166 | 156 | 156 | 166 | 166 | 193 | 197 | 186 | 196 | 259 | 259 | 214 | 218 | 137 | 137 | 165 | 169 |
| NHDF32 | 214 | 214 | 183 | 185 | 188 | 204 | 166 | 168 | 138 | 156 | 168 | 170 | 193 | 193 | 194 | 194 | 259 | 259 | 214 | 216 | 143 | 145 | 165 | 167 |
| NHDF33 | 228 | 230 | 183 | 185 | 196 | 204 | 166 | 166 | 138 | 142 | 168 | 168 | 195 | 195 | 186 | 186 | 259 | 259 | 216 | 216 | 139 | 145 | 167 | 167 |
| NHDF34 | 224 | 230 | 181 | 183 | 198 | 202 | 166 | 166 | 126 | 126 | 168 | 170 | 197 | 197 | 186 | 194 | 259 | 259 | 214 | 216 | 141 | 145 | 165 | 167 |
| NHDF35 | 214 | 214 | 185 | 185 | 188 | 202 | 166 | 168 | 138 | 138 | 168 | 170 | 195 | 197 | 190 | 204 | 253 | 253 | 212 | 216 | 139 | 145 | 163 | 167 |
| NHDF36 | 246 | 246 | 185 | 187 | 188 | 206 | 166 | 168 | 154 | 158 | 168 | 168 | 197 | 197 | 180 | 196 | 253 | 253 | 214 | 216 | 137 | 139 | 165 | 167 |
| NHDF37 | 232 | 232 | 183 | 187 | 184 | 192 | 166 | 170 | 156 | 156 | 168 | 170 | 195 | 195 | 186 | 196 | 253 | 253 | 212 | 216 | 143 | 145 | 163 | 167 |
| NHDF38 | 232 | 232 | 185 | 185 | 188 | 206 | 166 | 168 | 134 | 154 | 170 | 170 | 195 | 197 | 186 | 190 | 253 | 253 | 212 | 218 | 141 | 145 | 163 | 169 |
| NHDF39 | 232 | 238 | 185 | 187 | 180 | 190 | 166 | 168 | 152 | 156 | 166 | 170 | 170 | 195 | 194 | 190 | 253 | 271 | 212 | 222 | 141 | 145 | 163 | 173 |
| NHDF40 | 220 | 232 | 183 | 183 | 172 | 202 | 164 | 168 | 138 | 156 | 170 | 170 | 195 | 195 | 190 | 194 | 255 | 269 | 214 | 218 | 141 | 145 | 165 | 169 |
| NHDF41 | 232 | 232 | 183 | 185 | 202 | 208 | 166 | 170 | 138 | 156 | 170 | 170 | 193 | 195 | 190 | 196 | 259 | 259 | 208 | 220 | 139 | 145 | 159 | 171 |
| NHDF42 | 232 | 232 | 183 | 185 | 188 | 200 | 166 | 168 | 156 | 156 | 166 | 170 | 195 | 195 | 194 | 196 | 259 | 259 | 214 | 216 | 139 | 139 | 165 | 167 |
| NHDF43 | 222 | 222 | 185 | 187 | 204 | 206 | 166 | 168 | 158 | 160 | 168 | 168 | 195 | 197 | 188 | 196 | 261 | 261 | 214 | 214 | 143 | 139 | 165 | 165 |
| NHDF44 | 234 | 240 | 181 | 185 | 186 | 188 | 166 | 170 | 158 | 160 | 168 | 168 | 197 | 197 | 186 | 190 | 261 | 263 | 212 | 216 | 139 | 145 | 163 | 167 |
| NHDF45 | 232 | 240 | 183 | 185 | 196 | 200 | 166 | 168 | 120 | 136 | 168 | 168 | 195 | 197 | 188 | 190 | 261 | 261 | 212 | 216 | 139 | 145 | 163 | 167 |
| NHDF46 | 232 | 232 | 183 | 183 | 198 | 200 | 166 | 170 | 138 | 138 | 168 | 168 | 195 | 197 | 192 | 202 | 261 | 261 | 216 | 216 | 143 | 143 | 167 | 167 |
| NHDF47 | 232 | 238 | 183 | 185 | 198 | 206 | 162 | 168 | 136 | 156 | 168 | 168 | 195 | 195 | 184 | 188 | 261 | 261 | 214 | 216 | 141 | 145 | 165 | 167 |
| NHDF48 | 226 | 232 | 185 | 185 | 198 | 208 | 160 | 166 | 154 | 156 | 168 | 170 | 195 | 195 | 186 | 186 | 259 | 261 | 214 | 216 | 141 | 141 | 165 | 167 |
| NHDF49 | 230 | 232 | 183 | 185 | 196 | 208 | 166 | 168 | 158 | 158 | 160 | 170 | 193 | 193 | 184 | 188 | 259 | 259 | 212 | 218 | 139 | 145 | 163 | 169 |
| NHDF50 | 230 | 230 | 183 | 185 | 196 | 206 | 168 | 168 | 138 | 146 | 160 | 162 | 193 | 193 | 188 | 194 | 255 | 255 | 218 | 218 | 139 | 145 | 169 | 169 |
| MNWL01 | 220 | 228 | 195 | 197 | 200 | 200 | 148 | 162 | 126 | 130 | 164 | 166 | 191 | 191 | 196 | 198 | 255 | 259 | 200 | 214 | 147 | 151 | 151 | 165 |
| MNWL02 | 228 | 228 | 195 | 195 | 200 | 200 | 148 | 148 | 128 | 128 | 166 | 166 | 193 | 193 | 196 | 198 | 255 | 261 | 214 | 218 | 143 | 147 | 165 | 167 |
| MNWL03 | 228 | 228 | 193 | 195 | 210 | 210 | 148 | 164 | 128 | 130 | 166 | 166 | 193 | 193 | 194 | 196 | 257 | 259 | 214 | 214 | 149 | 149 | 165 | 165 |
| MNWL04 | 228 | 230 | 189 | 195 | 200 | 200 | 146 | 156 | 126 | 128 | 162 | 164 | 191 | 191 | 196 | 196 | 257 | 259 | 214 | 214 | 149 | 153 | 165 | 165 |
| MNWL05 | 228 | 230 | 193 | 197 | 198 | 1   |     |     |     |     |     |     |     |     |     |     |     |     |     |     |     |     |     |     |

|        |     |     |     |     |     |     |     |     |     |     |     |     |     |     |     |     |     |     |     |     |     |     |     |     |
|--------|-----|-----|-----|-----|-----|-----|-----|-----|-----|-----|-----|-----|-----|-----|-----|-----|-----|-----|-----|-----|-----|-----|-----|-----|
| MNBL18 | 226 | 228 | 195 | 197 | 200 | 204 | 146 | 160 | 112 | 122 | 156 | 168 | 189 | 193 | 194 | 196 | 255 | 257 | 200 | 220 | 149 | 153 | 151 | 171 |
| MNBL19 | 226 | 230 | 195 | 199 | 176 | 188 | 132 | 146 | 124 | 124 | 156 | 168 | 187 | 191 | 160 | 194 | 255 | 257 | 218 | 222 | 147 | 151 | 169 | 173 |
| MNBL20 | 226 | 230 | 195 | 197 | 176 | 188 | 146 | 148 | 124 | 126 | 166 | 170 | 189 | 199 | 188 | 198 | 253 | 257 | 214 | 218 | 143 | 145 | 165 | 167 |
| MNBL21 | 228 | 228 | 195 | 195 | 194 | 200 | 144 | 150 | 120 | 128 | 166 | 168 | 191 | 197 | 158 | 188 | 253 | 253 | 214 | 218 | 147 | 149 | 151 | 167 |
| MNBL22 | 226 | 228 | 195 | 195 | 202 | 214 | 146 | 146 | 112 | 124 | 166 | 168 | 191 | 201 | 160 | 190 | 253 | 253 | 214 | 220 | 143 | 149 | 165 | 169 |
| MNBL23 | 228 | 232 | 195 | 197 | 212 | 216 | 132 | 146 | 124 | 128 | 166 | 168 | 189 | 193 | 160 | 194 | 253 | 253 | 214 | 218 | 149 | 151 | 165 | 167 |
| MNBL24 | 228 | 230 | 197 | 206 | 216 | 244 | 148 | 124 | 126 | 166 | 168 | 191 | 193 | 118 | 194 | 253 | 257 | 214 | 216 | 147 | 151 | 165 | 167 |     |
| MNBL25 | 222 | 228 | 195 | 197 | 202 | 210 | 146 | 160 | 122 | 124 | 166 | 170 | 187 | 193 | 200 | 204 | 253 | 255 | 216 | 218 | 149 | 151 | 165 | 167 |
| MNBL26 | 228 | 228 | 195 | 197 | 190 | 202 | 146 | 152 | 126 | 126 | 166 | 170 | 189 | 193 | 194 | 198 | 253 | 253 | 200 | 218 | 143 | 145 | 165 | 167 |
| MNBL27 | 230 | 234 | 195 | 197 | 160 | 190 | 148 | 152 | 122 | 128 | 164 | 168 | 191 | 193 | 188 | 194 | 255 | 257 | 214 | 216 | 149 | 149 | 151 | 167 |
| MNBL28 | 228 | 234 | 195 | 197 | 190 | 190 | 144 | 148 | 122 | 128 | 166 | 168 | 189 | 195 | 160 | 190 | 253 | 257 | 214 | 218 | 147 | 149 | 165 | 169 |
| MNBL29 | 224 | 228 | 195 | 195 | 200 | 208 | 130 | 144 | 122 | 126 | 146 | 168 | 191 | 191 | 160 | 192 | 253 | 253 | 214 | 218 | 147 | 153 | 165 | 167 |
| MNBL30 | 226 | 230 | 193 | 195 | 200 | 214 | 130 | 144 | 124 | 126 | 168 | 172 | 191 | 201 | 160 | 192 | 253 | 253 | 214 | 216 | 145 | 151 | 165 | 167 |
| MNBL31 | 228 | 230 | 193 | 195 | 204 | 214 | 130 | 144 | 122 | 128 | 168 | 170 | 191 | 191 | 162 | 194 | 253 | 253 | 214 | 216 | 145 | 149 | 165 | 169 |
| MNBL32 | 226 | 230 | 193 | 197 | 204 | 208 | 132 | 144 | 128 | 128 | 168 | 170 | 193 | 193 | 162 | 196 | 255 | 255 | 212 | 214 | 143 | 149 | 165 | 167 |
| MNBL33 | 228 | 228 | 183 | 195 | 200 | 208 | 152 | 158 | 124 | 126 | 166 | 170 | 193 | 201 | 198 | 206 | 253 | 253 | 216 | 218 | 149 | 151 | 167 | 169 |
| MNBL34 | 222 | 228 | 195 | 197 | 208 | 214 | 152 | 158 | 126 | 268 | 164 | 166 | 191 | 191 | 186 | 188 | 253 | 253 | 200 | 218 | 147 | 151 | 151 | 169 |
| MNBL35 | 228 | 228 | 195 | 197 | 202 | 208 | 146 | 150 | 124 | 124 | 166 | 168 | 191 | 191 | 192 | 194 | 253 | 253 | 214 | 216 | 149 | 151 | 165 | 169 |
| MNBL36 | 228 | 232 | 195 | 197 | 204 | 214 | 146 | 150 | 124 | 126 | 166 | 166 | 191 | 195 | 194 | 204 | 253 | 253 | 214 | 218 | 143 | 145 | 165 | 165 |
| MNBL37 | 228 | 228 | 195 | 197 | 208 | 208 | 152 | 160 | 126 | 126 | 164 | 166 | 191 | 191 | 188 | 198 | 253 | 253 | 214 | 218 | 149 | 149 | 165 | 167 |
| MNBL38 | 228 | 228 | 181 | 195 | 176 | 202 | 144 | 144 | 126 | 128 | 166 | 168 | 193 | 193 | 190 | 198 | 253 | 253 | 214 | 216 | 149 | 151 | 163 | 165 |
| MNBL39 | 228 | 228 | 195 | 197 | 208 | 208 | 144 | 148 | 124 | 126 | 164 | 168 | 191 | 195 | 188 | 188 | 253 | 253 | 214 | 216 | 147 | 151 | 163 | 165 |
| MNBL40 | 226 | 228 | 195 | 197 | 200 | 204 | 144 | 148 | 114 | 126 | 166 | 168 | 187 | 195 | 194 | 194 | 253 | 257 | 212 | 214 | 147 | 153 | 163 | 165 |
| MNBL41 | 224 | 228 | 165 | 195 | 196 | 198 | 146 | 160 | 124 | 128 | 166 | 168 | 117 | 191 | 160 | 190 | 251 | 287 | 214 | 216 | 147 | 153 | 165 | 167 |
| MNBL42 | 226 | 228 | 193 | 195 | 198 | 202 | 146 | 148 | 126 | 128 | 166 | 168 | 191 | 195 | 186 | 190 | 253 | 257 | 214 | 216 | 141 | 145 | 165 | 167 |
| MNBL43 | 228 | 232 | 193 | 195 | 194 | 198 | 146 | 146 | 124 | 128 | 164 | 168 | 191 | 195 | 188 | 188 | 251 | 255 | 214 | 218 | 149 | 153 | 165 | 169 |
| MNBL44 | 228 | 228 | 191 | 195 | 196 | 198 | 146 | 160 | 124 | 128 | 166 | 168 | 187 | 195 | 194 | 194 | 251 | 287 | 214 | 214 | 149 | 153 | 165 | 165 |
| MNBL45 | 228 | 228 | 195 | 197 | 198 | 202 | 146 | 148 | 126 | 128 | 166 | 168 | 117 | 191 | 160 | 190 | 253 | 257 | 214 | 216 | 149 | 153 | 163 | 165 |
| MNBL46 | 228 | 228 | 193 | 197 | 194 | 198 | 146 | 146 | 124 | 128 | 166 | 168 | 191 | 195 | 186 | 190 | 251 | 255 | 214 | 218 | 147 | 153 | 163 | 165 |
| MNBL47 | 226 | 228 | 193 | 195 | 196 | 198 | 146 | 160 | 124 | 128 | 164 | 168 | 191 | 195 | 188 | 188 | 251 | 287 | 214 | 214 | 147 | 153 | 163 | 169 |
| MNBL48 | 224 | 228 | 195 | 197 | 198 | 202 | 146 | 148 | 126 | 128 | 166 | 168 | 187 | 195 | 194 | 194 | 253 | 257 | 214 | 216 | 141 | 145 | 163 | 165 |
| MNBL49 | 226 | 228 | 195 | 197 | 194 | 198 | 146 | 146 | 124 | 128 | 166 | 168 | 117 | 191 | 160 | 190 | 251 | 255 | 212 | 214 | 147 | 153 | 163 | 165 |
| MNBL50 | 126 | 228 | 191 | 195 | 194 | 198 | 146 | 146 | 122 | 128 | 166 | 168 | 191 | 195 | 186 | 190 | 251 | 255 | 212 | 214 | 149 | 153 | 163 | 169 |
| PA001  | 190 | 230 | 177 | 185 | 190 | 190 | 148 | 160 | 132 | 134 | 182 | 194 | 179 | 189 | 192 | 206 | 255 | 255 | 214 | 214 | 141 | 143 | 165 | 165 |
| PA002  | 228 | 228 | 185 | 187 | 204 | 208 | 148 | 160 | 132 | 134 | 176 | 176 | 187 | 191 | 190 | 190 | 249 | 255 | 214 | 216 | 139 | 145 | 165 | 169 |
| PA003  | 228 | 228 | 187 | 187 | 208 | 208 | 148 | 158 | 132 | 134 | 176 | 176 | 191 | 191 | 190 | 190 | 255 | 269 | 214 | 216 | 139 | 145 | 165 | 171 |
| PA004  | 230 | 230 | 177 | 191 | 184 | 190 | 148 | 158 | 132 | 132 | 170 | 178 | 189 | 191 | 192 | 196 | 239 | 259 | 220 | 220 | 137 | 143 | 171 | 171 |
| PA005  | 230 | 230 | 191 | 193 | 206 | 210 | 158 | 174 | 144 | 144 | 142 | 166 | 191 | 193 | 184 | 202 | 239 | 245 | 214 | 216 | 141 | 145 | 165 | 173 |
| PA006  | 230 | 230 | 185 | 191 | 206 | 206 | 158 | 176 | 138 | 144 | 184 | 184 | 191 | 191 | 194 | 194 | 239 | 245 | 216 | 216 | 137 | 145 | 167 | 167 |
| PA007  | 228 | 228 | 175 | 185 | 172 | 208 | 158 | 194 | 122 | 138 | 160 | 184 | 171 | 193 | 164 | 194 | 237 | 251 | 216 | 216 | 141 | 143 | 167 | 169 |
| PA008  | 228 | 230 | 185 | 185 | 210 | 210 | 160 | 182 | 134 | 134 | 162 | 182 | 191 | 193 | 194 | 196 | 241 | 253 | 218 | 220 | 143 | 145 | 169 | 171 |
| PA009  | 228 | 230 | 185 | 207 | 204 | 208 | 146 | 158 | 126 | 128 | 186 | 196 | 195 | 195 | 192 | 204 | 255 | 259 | 218 | 220 | 143 | 143 | 169 | 171 |
| PA010  | 230 | 230 | 185 | 205 | 182 | 186 | 158 | 172 | 128 | 128 | 158 | 186 | 191 | 195 | 202 | 202 | 255 | 261 | 218 | 220 | 143 | 143 | 169 | 171 |
| PA011  | 230 | 230 | 187 | 193 | 208 | 212 | 158 | 178 | 132 | 132 | 188 | 188 | 193 | 201 | 196 | 198 | 253 | 257 | 218 | 220 | 139 | 145 | 169 | 175 |
| PA012  | 230 | 230 | 177 | 191 | 210 | 214 | 146 | 156 | 132 | 132 | 160 | 186 | 117 | 191 | 166 | 192 | 257 | 257 | 212 | 214 | 147 | 145 | 167 | 173 |
| PA013  | 230 | 230 | 187 | 187 | 208 | 208 | 162 | 180 | 130 | 132 | 184 | 188 | 189 | 191 | 166 | 202 | 257 | 257 | 220 | 220 | 139 | 145 | 171 | 171 |
| PA014  | 230 | 236 | 187 | 189 | 192 | 210 | 160 | 160 | 130 | 132 | 180 | 186 | 189 | 191 | 190 | 202 | 257 | 257 | 220 | 220 | 141 | 145 | 169 | 169 |
| PA015  | 230 | 230 | 187 | 187 | 192 | 194 | 162 | 178 | 132 | 136 | 164 | 184 | 193 | 195 | 192 | 196 | 257 | 261 | 220 | 222 | 143 | 143 | 167 | 167 |
| PA016  | 230 | 230 | 187 | 187 | 192 | 210 | 160 | 178 | 130 | 132 | 180 | 184 | 193 | 195 | 190 | 190 | 255 | 257 | 218 | 222 | 143 | 145 | 169 | 173 |
| PA017  | 230 | 230 | 189 | 193 | 192 | 202 | 156 | 166 | 130 | 132 | 184 | 186 | 193 | 193 | 192 | 206 | 257 | 273 | 220 | 222 | 137 | 139 | 171 | 173 |
| PA018  | 230 | 230 | 177 | 187 | 206 | 208 | 150 | 164 | 154 | 154 | 184 | 198 | 193 | 193 | 184 | 190 | 255 | 273 | 218 | 222 | 145 | 145 | 169 | 173 |
| PA019  | 230 | 230 | 189 | 191 | 192 | 208 | 150 | 158 | 132 | 132 | 184 | 184 | 193 | 195 | 192 | 198 | 257 | 263 | 218 | 222 | 139 | 145 | 169 | 171 |
| PA020  | 228 | 228 | 187 | 195 | 206 | 206 | 158 | 176 | 130 | 130 | 184 | 186 | 193 | 195 | 194 | 194 | 255 | 273 | 216 | 220 | 145 | 145 | 167 | 169 |
| PA021  | 222 | 228 | 179 | 187 | 206 | 206 | 160 | 162 | 124 | 130 | 184 | 186 | 195 | 197 | 190 | 190 | 239 | 257 | 218 | 218 | 145 | 145 | 169 | 173 |
| PA022  | 228 | 230 | 179 | 187 | 186 | 196 | 156 | 166 | 124 | 146 | 164 | 166 | 193 | 195 | 194 | 196 | 241 | 249 | 218 | 218 | 141 | 143 | 169 | 169 |
| PA023  | 222 | 228 | 185 | 189 | 206 | 206 | 160 | 174 | 118 | 130 | 166 | 168 | 193 | 193 | 194 | 196 | 239 | 257 | 220 | 220 | 141 | 145 | 171 | 171 |
| PA024  | 222 | 228 | 185 | 185 | 176 | 186 | 160 | 166 | 120 | 130 | 164 | 168 | 191 | 193 | 194 | 196 | 237 | 261 | 218 | 220 | 139 | 139 | 169 | 169 |
| PA025  | 226 | 228 | 177 | 187 | 206 | 210 | 160 | 190 | 136 | 140 | 184 | 186 | 191 | 191 | 192 | 200 | 257 | 255 | 212 | 216 | 141 | 145 | 167 | 173 |
| PA026  | 230 | 230 | 177 | 189 | 186 | 210 | 162 | 178 | 136 | 138 | 156 | 166 | 189 | 191 | 192 | 192 | 257 | 259 | 214 | 216 | 145 | 141 | 165 | 173 |
| PA027  | 230 | 230 | 187 | 187 | 186 | 208 | 162 | 178 | 134 | 140 | 156 | 166 | 189 | 193 | 198 | 200 | 257 | 257 | 214 | 216 | 143 | 145 | 165 | 173 |

|        |     |     |     |     |     |     |     |     |     |     |     |     |     |     |     |     |     |     |     |     |     |     |     |     |
|--------|-----|-----|-----|-----|-----|-----|-----|-----|-----|-----|-----|-----|-----|-----|-----|-----|-----|-----|-----|-----|-----|-----|-----|-----|
| VABS41 | 228 | 228 | 185 | 187 | 172 | 202 | 158 | 164 | 126 | 132 | 164 | 164 | 191 | 193 | 190 | 198 | 239 | 255 | 212 | 212 | 137 | 143 | 163 | 167 |
| VABS42 | 228 | 228 | 181 | 181 | 206 | 206 | 146 | 158 | 124 | 126 | 160 | 164 | 177 | 187 | 158 | 186 | 253 | 253 | 216 | 216 | 139 | 143 | 171 | 173 |
| VABS43 | 226 | 232 | 179 | 183 | 180 | 200 | 154 | 172 | 130 | 134 | 138 | 164 | 193 | 193 | 192 | 192 | 253 | 253 | 208 | 212 | 137 | 143 | 165 | 169 |
| VABS44 | 228 | 230 | 181 | 183 | 202 | 206 | 160 | 176 | 126 | 146 | 168 | 186 | 189 | 189 | 188 | 190 | 253 | 253 | 212 | 214 | 139 | 143 | 165 | 165 |
| VABS45 | 220 | 220 | 183 | 185 | 180 | 180 | 162 | 190 | 124 | 128 | 164 | 164 | 187 | 191 | 186 | 188 | 261 | 263 | 212 | 214 | 139 | 143 | 165 | 169 |
| VABS46 | 226 | 230 | 181 | 181 | 200 | 212 | 146 | 156 | 134 | 134 | 166 | 168 | 189 | 191 | 164 | 190 | 237 | 261 | 216 | 216 | 137 | 143 | 163 | 169 |
| VABS47 | 228 | 230 | 185 | 191 | 188 | 192 | 170 | 170 | 130 | 134 | 162 | 162 | 187 | 187 | 166 | 192 | 257 | 257 | 214 | 214 | 135 | 143 | 163 | 167 |
| VABS48 | 214 | 228 | 173 | 185 | 202 | 204 | 164 | 164 | 128 | 132 | 142 | 162 | 191 | 191 | 190 | 198 | 257 | 259 | 212 | 214 | 135 | 139 | 165 | 165 |
| VABS49 | 226 | 226 | 183 | 183 | 190 | 210 | 156 | 156 | 130 | 132 | 164 | 166 | 191 | 193 | 190 | 192 | 253 | 259 | 216 | 218 | 147 | 149 | 165 | 165 |
| VABS50 | 226 | 226 | 179 | 179 | 198 | 202 | 158 | 172 | 134 | 134 | 154 | 164 | 191 | 193 | 184 | 188 | 253 | 267 | 216 | 216 | 141 | 141 | 163 | 167 |
| NCAV01 | 234 | 234 | 187 | 189 | 196 | 210 | 168 | 202 | 128 | 132 | 168 | 168 | 195 | 195 | 196 | 204 | 257 | 257 | 194 | 218 | 141 | 149 | 151 | 167 |
| NCAV02 | 234 | 236 | 185 | 197 | 208 | 212 | 150 | 160 | 134 | 136 | 170 | 172 | 191 | 191 | 196 | 196 | 257 | 273 | 218 | 218 | 141 | 147 | 169 | 169 |
| NCAV03 | 234 | 236 | 185 | 197 | 200 | 200 | 172 | 172 | 132 | 138 | 168 | 172 | 193 | 193 | 196 | 202 | 255 | 257 | 216 | 216 | 141 | 147 | 169 | 171 |
| NCAV04 | 216 | 216 | 185 | 197 | 190 | 202 | 150 | 166 | 132 | 132 | 168 | 170 | 195 | 195 | 192 | 202 | 255 | 255 | 216 | 216 | 151 | 153 | 167 | 167 |
| NCAV05 | 240 | 240 | 189 | 191 | 186 | 192 | 150 | 162 | 128 | 132 | 168 | 168 | 191 | 193 | 190 | 192 | 257 | 271 | 218 | 218 | 141 | 147 | 167 | 171 |
| NCAV06 | 246 | 246 | 185 | 185 | 210 | 214 | 168 | 170 | 134 | 136 | 192 | 194 | 195 | 195 | 196 | 200 | 271 | 275 | 216 | 216 | 141 | 149 | 167 | 167 |
| NCAV07 | 234 | 238 | 197 | 197 | 200 | 204 | 148 | 176 | 130 | 150 | 144 | 168 | 191 | 191 | 200 | 206 | 261 | 261 | 0   | 0   | 141 | 147 | 169 | 171 |
| NCAV08 | 232 | 238 | 195 | 197 | 192 | 202 | 160 | 176 | 134 | 136 | 166 | 166 | 193 | 203 | 188 | 202 | 255 | 257 | 214 | 216 | 141 | 147 | 151 | 167 |
| NCAV09 | 232 | 232 | 197 | 199 | 190 | 222 | 146 | 158 | 134 | 134 | 158 | 168 | 199 | 207 | 194 | 202 | 257 | 263 | 216 | 216 | 143 | 147 | 169 | 171 |
| NCAV10 | 232 | 232 | 185 | 191 | 198 | 200 | 162 | 162 | 126 | 130 | 164 | 166 | 195 | 195 | 202 | 204 | 257 | 257 | 214 | 218 | 141 | 147 | 159 | 169 |
| NCAV11 | 230 | 230 | 177 | 187 | 206 | 206 | 162 | 176 | 132 | 132 | 178 | 180 | 197 | 199 | 166 | 166 | 257 | 257 | 216 | 218 | 139 | 139 | 165 | 165 |
| NCAV12 | 230 | 236 | 199 | 199 | 192 | 204 | 150 | 166 | 130 | 132 | 168 | 168 | 195 | 203 | 190 | 196 | 255 | 255 | 214 | 214 | 141 | 147 | 169 | 173 |
| NCAV13 | 230 | 230 | 197 | 201 | 196 | 208 | 160 | 176 | 130 | 132 | 166 | 168 | 193 | 193 | 166 | 192 | 241 | 263 | 216 | 218 | 139 | 147 | 167 | 167 |
| NCAV14 | 230 | 230 | 197 | 197 | 208 | 214 | 148 | 168 | 134 | 134 | 164 | 170 | 193 | 193 | 190 | 200 | 259 | 259 | 216 | 216 | 141 | 147 | 169 | 171 |
| NCAV15 | 228 | 228 | 171 | 181 | 188 | 212 | 160 | 162 | 134 | 134 | 168 | 168 | 189 | 195 | 198 | 200 | 263 | 263 | 212 | 216 | 145 | 145 | 167 | 169 |
| NCAV16 | 228 | 228 | 171 | 191 | 188 | 210 | 162 | 162 | 132 | 132 | 166 | 170 | 179 | 193 | 196 | 198 | 259 | 259 | 214 | 216 | 145 | 147 | 167 | 167 |
| NCAV17 | 230 | 236 | 185 | 191 | 190 | 212 | 160 | 162 | 124 | 124 | 172 | 176 | 189 | 195 | 190 | 192 | 257 | 259 | 216 | 218 | 141 | 147 | 169 | 169 |
| NCAV18 | 230 | 230 | 185 | 185 | 206 | 208 | 162 | 178 | 140 | 140 | 164 | 186 | 191 | 193 | 198 | 200 | 257 | 257 | 214 | 216 | 143 | 147 | 169 | 171 |
| NCAV19 | 228 | 228 | 185 | 187 | 206 | 206 | 162 | 176 | 128 | 132 | 168 | 168 | 197 | 197 | 192 | 194 | 255 | 255 | 216 | 216 | 137 | 147 | 167 | 167 |
| NCAV20 | 228 | 228 | 185 | 189 | 194 | 214 | 160 | 178 | 124 | 124 | 162 | 166 | 195 | 195 | 190 | 200 | 257 | 257 | 216 | 216 | 145 | 147 | 165 | 167 |
| NCAV21 | 228 | 228 | 185 | 189 | 198 | 202 | 164 | 164 | 130 | 136 | 160 | 168 | 197 | 199 | 194 | 196 | 255 | 271 | 216 | 218 | 143 | 145 | 167 | 167 |
| NCAV22 | 230 | 230 | 173 | 185 | 208 | 208 | 164 | 180 | 124 | 126 | 168 | 168 | 191 | 195 | 192 | 192 | 259 | 259 | 216 | 220 | 145 | 147 | 167 | 169 |
| NCAV23 | 230 | 230 | 175 | 185 | 208 | 208 | 176 | 176 | 124 | 128 | 190 | 194 | 209 | 209 | 190 | 190 | 253 | 253 | 216 | 216 | 141 | 147 | 169 | 171 |
| NCAV24 | 230 | 230 | 185 | 185 | 188 | 198 | 144 | 152 | 132 | 160 | 168 | 172 | 195 | 195 | 194 | 200 | 265 | 267 | 218 | 222 | 141 | 147 | 169 | 169 |
| NCAV25 | 230 | 230 | 185 | 185 | 190 | 208 | 168 | 170 | 126 | 130 | 168 | 168 | 119 | 193 | 188 | 190 | 245 | 263 | 216 | 218 | 143 | 147 | 167 | 167 |
| NCAV26 | 234 | 234 | 185 | 201 | 186 | 194 | 160 | 180 | 120 | 132 | 154 | 158 | 191 | 191 | 196 | 200 | 257 | 257 | 216 | 216 | 141 | 147 | 167 | 169 |
| NCAV27 | 230 | 234 | 185 | 203 | 208 | 212 | 158 | 158 | 132 | 136 | 174 | 192 | 191 | 197 | 164 | 194 | 259 | 263 | 216 | 218 | 141 | 147 | 167 | 169 |
| NCAV28 | 230 | 230 | 181 | 183 | 208 | 214 | 184 | 192 | 134 | 134 | 190 | 190 | 193 | 195 | 188 | 190 | 253 | 255 | 218 | 218 | 145 | 145 | 167 | 167 |
| NCAV29 | 228 | 232 | 173 | 185 | 194 | 206 | 160 | 184 | 142 | 142 | 168 | 170 | 193 | 193 | 196 | 196 | 259 | 259 | 216 | 218 | 141 | 147 | 171 | 175 |
| NCAV30 | 234 | 234 | 185 | 185 | 212 | 214 | 170 | 172 | 130 | 132 | 166 | 168 | 193 | 203 | 192 | 196 | 261 | 281 | 216 | 218 | 145 | 147 | 169 | 169 |
| NCAV31 | 230 | 230 | 185 | 185 | 212 | 212 | 162 | 174 | 130 | 132 | 146 | 170 | 193 | 197 | 198 | 204 | 255 | 255 | 200 | 216 | 141 | 147 | 167 | 171 |
| NCAV32 | 230 | 238 | 183 | 183 | 212 | 212 | 158 | 160 | 140 | 158 | 166 | 166 | 193 | 195 | 190 | 192 | 261 | 265 | 216 | 218 | 141 | 147 | 167 | 169 |
| NCAV33 | 232 | 232 | 187 | 189 | 210 | 212 | 158 | 176 | 140 | 144 | 168 | 168 | 179 | 193 | 192 | 196 | 257 | 261 | 214 | 220 | 145 | 149 | 169 | 171 |
| NCAV34 | 232 | 234 | 177 | 189 | 210 | 212 | 160 | 174 | 124 | 128 | 170 | 172 | 189 | 191 | 194 | 198 | 251 | 259 | 214 | 224 | 145 | 151 | 153 | 171 |
| NCAV35 | 232 | 236 | 177 | 191 | 192 | 192 | 160 | 174 | 130 | 132 | 168 | 170 | 191 | 193 | 174 | 188 | 257 | 259 | 216 | 216 | 145 | 145 | 167 | 169 |
| NCAV36 | 234 | 236 | 189 | 191 | 180 | 210 | 160 | 166 | 132 | 134 | 166 | 168 | 197 | 197 | 196 | 196 | 255 | 255 | 218 | 218 | 141 | 147 | 163 | 169 |
| NCAV37 | 234 | 234 | 187 | 189 | 210 | 224 | 170 | 174 | 130 | 134 | 168 | 194 | 191 | 191 | 202 | 208 | 257 | 261 | 220 | 222 | 141 | 147 | 171 | 173 |
| NCAV38 | 232 | 232 | 187 | 195 | 208 | 212 | 162 | 162 | 128 | 132 | 168 | 170 | 193 | 193 | 200 | 200 | 257 | 275 | 216 | 218 | 147 | 147 | 169 | 169 |
| NCAV39 | 232 | 232 | 185 | 203 | 180 | 184 | 168 | 174 | 132 | 134 | 168 | 170 | 195 | 195 | 202 | 206 | 259 | 259 | 216 | 216 | 149 | 151 | 167 | 167 |
| NCAV40 | 230 | 232 | 185 | 203 | 190 | 190 | 174 | 182 | 130 | 132 | 166 | 168 | 195 | 205 | 186 | 204 | 257 | 259 | 216 | 218 | 141 | 147 | 167 | 171 |
| NCAV41 | 232 | 232 | 187 | 203 | 212 | 212 | 164 | 178 | 132 | 134 | 170 | 172 | 193 | 205 | 194 | 198 | 255 | 255 | 216 | 216 | 145 | 151 | 171 | 171 |
| NCAV42 | 230 | 230 | 185 | 185 | 176 | 176 | 168 | 168 | 132 | 136 | 158 | 168 | 191 | 191 | 204 | 204 | 257 | 257 | 216 | 220 | 143 | 143 | 169 | 171 |
| NCAV43 | 230 | 230 | 181 | 183 | 172 | 174 | 170 | 172 | 126 | 130 | 168 | 172 | 193 | 195 | 194 | 200 | 257 | 257 | 214 | 216 | 145 | 149 | 165 | 165 |
| NCAV44 | 224 | 230 | 173 | 185 | 190 | 212 | 162 | 194 | 126 | 126 | 168 | 168 | 189 | 201 | 192 | 194 | 249 | 257 | 216 | 216 | 143 | 147 | 169 | 171 |
| NCAV45 | 230 | 230 | 185 | 185 | 208 | 210 | 158 | 162 | 132 | 138 | 168 | 168 | 193 | 195 | 192 | 196 | 255 | 255 | 216 | 218 | 139 | 139 | 165 | 167 |
| NCAV46 | 230 | 230 | 185 | 187 | 190 | 212 | 170 | 170 | 134 | 138 | 164 | 196 | 193 | 203 | 188 | 192 | 255 | 255 | 216 | 218 | 141 | 147 | 169 | 169 |
| NCAV47 | 230 | 230 | 183 | 189 | 212 | 216 | 176 | 176 | 126 | 128 | 170 | 188 | 193 | 193 | 192 | 192 | 253 | 257 | 218 | 220 | 145 | 145 | 169 | 171 |
| NCAV48 | 230 | 230 | 185 | 203 | 210 | 216 | 154 | 154 | 130 | 132 | 176 | 178 | 191 | 191 | 196 | 198 | 255 | 255 | 216 | 216 | 141 | 147 | 169 | 169 |
| NCAV49 | 228 | 228 | 187 | 203 | 204 | 208 | 142 | 148 | 132 | 132 | 166 | 170 | 201 | 203 | 192 | 192 | 257 | 257 | 220 | 222 | 151 | 155 | 167 | 169 |
| NCAV50 | 228 | 228 | 185 | 185 | 178 | 208 | 142 | 148 | 132 | 132 | 166 | 170 | 201 | 203 | 192 | 192 | 257 | 257 | 220 | 222 | 151 | 155 | 167 | 169 |
